# Supplementary material for: Investigating the OXA Variants of ESKAPE Pathogens
Source: MDPI journal article supplement (doi:10.3390/antibiotics10121539), 2021-12-15
Supplement: s1 [file s1]

Article

# Investigating the OXA variants of ESKAPE pathogens

Deeksha Pandey <sup>1</sup>, Neelja Singhal <sup>1,\*</sup> and Manish Kumar <sup>1,\*</sup>

Department of Biophysics, University of Delhi South Campus, New Delhi, 110021, India; deeksha.pandey.biophysics@south.du.ac.in(D.P.);

\* Correspondence: neelja@south.du.ac.in (N.S.); manish@south.du.ac.in (M.K.)

## Supplementary Materials

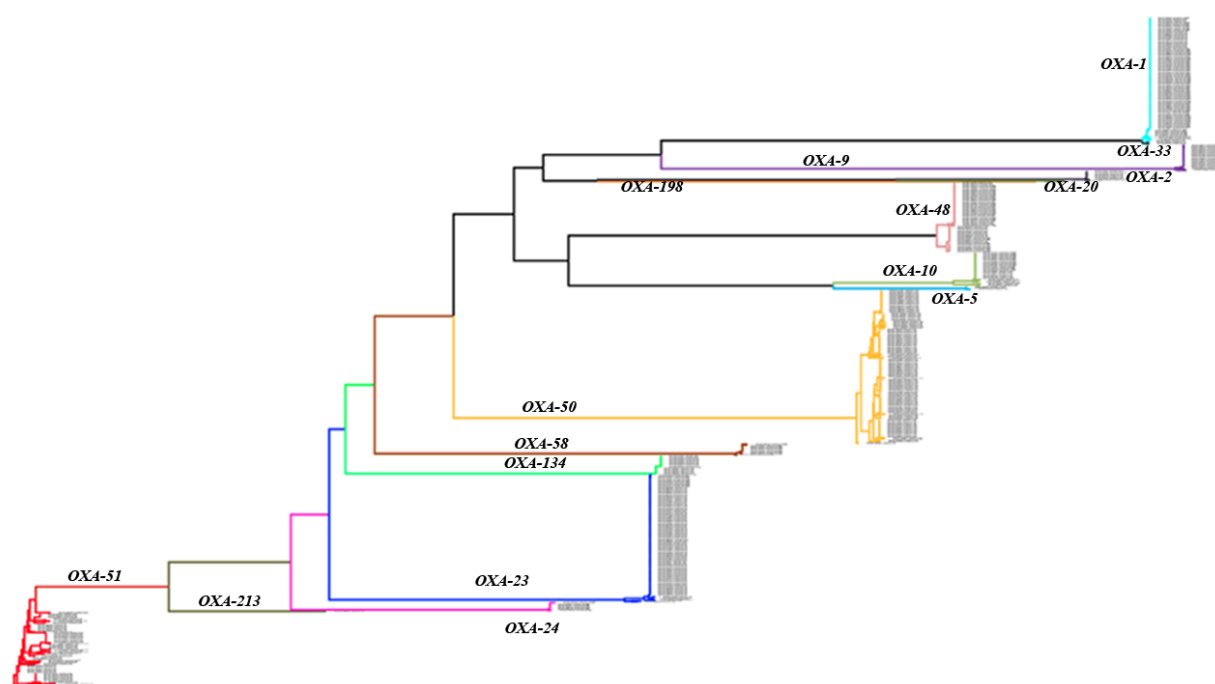

**Figure S1.** The phylogram of 929 OXA sequences of *Klebsiella pneumoniae*, *Acinetobacter baumannii*, *Pseudomonas aeruginosa*, and *Enterobacter* species. Each enzyme group was colored with a different shade. A total of 929 sequences formed 927 leaves and 1856 nodes. The tree session is also shared for a broader view (<https://phylogeny.io/share/97725f9b8259229493b0147bee59aedde7277a6f>). In the shared tree session, the zoom in and out, scrolling (up, down, left & right) option is available which can be used to discern the branches and clades of each enzyme group and their sequences.

**Table S1.** Distribution of OXA variants in ESKAPE pathogens.

| Organism             | Variants/subfamilies of OXA found in chromosome where both chromosome and plasmid are genetic material | Variants/subfamilies of OXA found in plasmid where both chromosome and plasmid are genetic material        | Variants/subfamilies of OXA found in chromosome where only chromosome is genetic material |
|----------------------|--------------------------------------------------------------------------------------------------------|------------------------------------------------------------------------------------------------------------|-------------------------------------------------------------------------------------------|
| <i>E. faecium</i>    | 0                                                                                                      | 0                                                                                                          | 0                                                                                         |
| <i>S. aureus</i>     | BlaR1                                                                                                  | BlaR1                                                                                                      | 0                                                                                         |
| <i>K. pneumoniae</i> | OXA-1/OXA-1-like<br>OXA-48/OXA-48-like<br>OXA-181/OXA-48-like                                          | OXA-1/ OXA-1-like<br>OXA-2/OXA-2-like<br>OXA-204/OXA-48-like<br>OXA-244/OXA-48-like<br>OXA-181/OXA-48-like | OXA-181/ OXA-48-like<br>OXA-1/OXA-1-like<br>OXA-48/ OXA-48-like                           |

|                      |                                                                                                                                                                                                                                                                                                                                                                                                                                                                                                                                                                                                                                                                                                                                                                                                                                                      |                                                                                                                                                                                                                                                                  |                                                                                                                                                                                                                                                                                                                                                                                                                   |
|----------------------|------------------------------------------------------------------------------------------------------------------------------------------------------------------------------------------------------------------------------------------------------------------------------------------------------------------------------------------------------------------------------------------------------------------------------------------------------------------------------------------------------------------------------------------------------------------------------------------------------------------------------------------------------------------------------------------------------------------------------------------------------------------------------------------------------------------------------------------------------|------------------------------------------------------------------------------------------------------------------------------------------------------------------------------------------------------------------------------------------------------------------|-------------------------------------------------------------------------------------------------------------------------------------------------------------------------------------------------------------------------------------------------------------------------------------------------------------------------------------------------------------------------------------------------------------------|
|                      |                                                                                                                                                                                                                                                                                                                                                                                                                                                                                                                                                                                                                                                                                                                                                                                                                                                      | OXA-232/OXA-48-like<br>OXA-10/OXA-10-like<br>OXA-9/OXA-9-like<br>OXA-48/OXA-48-like                                                                                                                                                                              |                                                                                                                                                                                                                                                                                                                                                                                                                   |
| <i>A. baumannii</i>  | OXA-106/ OXA-51-like<br>OXA-109/ OXA-51-like<br>OXA-113/ OXA-51-like<br>OXA-126/ OXA-51-like<br>OXA-132/ OXA-51-like<br>OXA-144/ OXA-51-like<br>OXA-173/ OXA-51-like<br>OXA-180/ OXA-51-like<br>OXA-2/ OXA-2-like<br>OXA-20/ OXA-20-like<br>OXA-239/ OXA-23-like<br>OXA-340/ OXA-51-like<br>OXA-371/ OXA-51-like<br>OXA-402/ OXA-51-like<br>OXA-500/ OXA-213-like<br>OXA-735/ OXA-51-like<br>OXA-834/ OXA-51-like<br>OXA-94/ OXA-51-like<br>OXA-67/ OXA-51-like<br>OXA-70/ OXA-51-like<br>OXA-78/ OXA-51-like<br>OXA-92/ OXA-51-like<br>OXA-104/ OXA-51-like<br>OXA-51/ OXA-51-like<br>OXA-90/ OXA-51-like<br>OXA-82/ OXA-51-like<br>OXA-235/ OXA-134-like<br>OXA-64/ OXA-51-like<br>OXA-98 / OXA-51-like<br>OXA-259/ OXA-51-like<br>OXA-69/ OXA-51-like<br>OXA-65/ OXA-51-like<br>OXA-68/ OXA-51-like<br>OXA-66/ OXA-51-like<br>OXA-23/ OXA-23-like | OXA-164/ OXA-58-like<br>OXA-23/ OXA-23-like<br>OXA-24/ OXA-24-like<br>OXA-235/ OXA-134-like<br>OXA-237/ OXA-134-like<br>OXA-420/ OXA-58-like<br>OXA-437/ OXA-24-like<br>OXA-51/ OXA-51-like<br>OXA-58/ OXA-58-like<br>OXA-72/ OXA-24-like<br>OXA-96/ OXA-58-like | OXA-113/ OXA-51-like<br>OXA-23/ OXA-23-like<br>OXA-235/ OXA-134-like<br>OXA-237/ OXA-134-like OXA-<br>256/ OXA-10-like<br>OXA-259/ OXA-51-like<br>OXA-343/ OXA-51-like<br>OXA-51/ OXA-51-like<br>OXA-66/ OXA-51-like<br>OXA-68/ OXA-51-like<br>OXA-684/ OXA-51-like<br>OXA-69/ OXA-51-like<br>OXA-90/ OXA-51-like                                                                                                 |
| <i>P. aeruginosa</i> | OXA-1/OXA-1-like<br>OXA-10/ OXA-10-like<br>OXA-133/ OXA-23-like<br>OXA-2/ OXA-2-like<br>OXA-395/ OXA-50-like<br>OXA-396/ OXA-10-like<br>OXA-4/ OXA-1-like<br>OXA-486/ OXA-50-like<br>OXA-488/ OXA-50-like<br>OXA-494/ OXA-50-like<br>OXA-50/ OXA-50-like<br>OXA-847/ OXA-50-like<br>OXA-848/ OXA-50-like                                                                                                                                                                                                                                                                                                                                                                                                                                                                                                                                             | OXA-1/OXA-1-like<br>OXA-10/ OXA-10-like<br>OXA-101/ OXA-10-like                                                                                                                                                                                                  | OXA-1/OXA-1-like<br>OXA-101/ OXA-10-like<br>OXA-198/ OXA-198-like<br>OXA-21/ OXA-2-like<br>OXA-677/ OXA-10-like<br>OXA-796/OXA-1-like<br>OXA-9/OXA-9-like<br>OXA-901/OXA-50-like<br>OXA-908/OXA-50-like<br>OXA-914/OXA-50-like<br>OXA-129/OXA-5-like<br>OXA-17/ OXA-10-like<br>OXA-35/ OXA-10-like<br>OXA-4/ OXA-1-like<br>OXA-905/OXA-50-like<br>OXA-902/OXA-50-like<br>OXA-904/OXA-50-like<br>OXA-2/ OXA-2-like |

|                          |                                       |                                                                                                                                                       |   |                                                                                                                                                                                                                                  |
|--------------------------|---------------------------------------|-------------------------------------------------------------------------------------------------------------------------------------------------------|---|----------------------------------------------------------------------------------------------------------------------------------------------------------------------------------------------------------------------------------|
| <i>Enterobacter</i> spp. | OXA-1/OXA-1-like<br>OXA-2/ OXA-2-like | OXA-48/ OXA-48-like<br>OXA-1/OXA-1-like<br>OXA-129/OXA-5-like<br>OXA-9/OXA-9-like<br>OXA-181/ OXA-48-like<br>OXA-10/OXA-10-like<br>OXA-17/OXA-10-like | 0 | OXA-847/OXA-50-like<br>OXA-851/OXA-50-like<br>OXA-10/OXA-10-like<br>OXA-396/OXA-50-like<br>OXA-846/OXA-50-like<br>OXA-486/OXA-50-like<br>OXA-395/OXA-50-like<br>OXA-494/OXA-50-like<br>OXA-50/OXA-50-like<br>OXA-488/OXA-50-like |
|                          |                                       |                                                                                                                                                       |   |                                                                                                                                                                                                                                  |

Table S2. a: Target-Template details of selected modeled structures.

| Variant Name | C-score | Amino Acid | Template Used                              |
|--------------|---------|------------|--------------------------------------------|
| OXA-9-like   | -0.96   | 279 a.a.   | 6nhu:A, 7oda:A, 6huh,<br>7kis, 6nio:A      |
| OXA-198-like | -0.02   | 260 a.a.   | 6nlw:A, 1nrf:A, 3qnb:A,<br>5dtk:A, 3hbr:B, |
| OXA-50-like  | -0.49   | 262 a.a.   | 4JF4:A, 3hbr:B, 3qnb:A,<br>7oda:A, 6nlw:A  |

Table S2. b: Model validation.

| Variant Name | Ramachandran Plot Statistics      |                                       |                                       |                               |                                                | ERRAT Statistics | Verify 3D Statistics |
|--------------|-----------------------------------|---------------------------------------|---------------------------------------|-------------------------------|------------------------------------------------|------------------|----------------------|
|              | Residues in most favorable region | Residues in additional allowed region | Residues in generously allowed region | Residues in disallowed region | Number of non-glycine and non-proline residues | Score            | Score                |
| OXA-9-like   | 158 (65.6%)                       | 64 (26.6%)                            | 12 (5%)                               | 7 (2.9%)                      | 241 (100%)                                     | 79.33            | 84.59%               |
| OXA-198-like | 185 (78.7%)                       | 44 (18.7%)                            | 4 (1.7%)                              | 2 (0.9%)                      | 235 (100%)                                     | 86.50            | 91.54%               |
| OXA-50-like  | 181 (81.9%)                       | 33 (14.9%)                            | 7 (3.2%)                              | 0 (0%)                        | 221 (100%)                                     | 95.27            | 91.60%               |
