# Supplementary material for: Investigating the OXA Variants of ESKAPE Pathogens
Source: MDPI journal article supplement (doi:10.3390/antibiotics10121539), 2021-12-15
Supplement: s1 [file s1]

OXA-1-like subfamily

*OXA-1-like BBE55408.1 K.p.*

|                           |        |                                               |
|---------------------------|--------|-----------------------------------------------|
| OXA-1-like BBE55408.1     | K.p.   | MKNTIHHINFAIFLIIANIYSSASASTDISTVASPLFEGTEGCFL |
| 1M6K beta-lactamase OXA-1 |        | STDISTVASPLFEGTEGCFL                          |
| OXA-1-like AVK27274.1     | P.a.   | MKNTIHHINFAIFLIIANIYSSASASTDISTVASPLFEGTEGCFL |
| OXA-1-like AWE78522.1     | P.a.   | MKNTIHHINFAIFLIIANIYSSASASTDISTVASPLFEGTEGCFL |
| OXA-1-like QLA55054.1     | P.a.   | MKNTIHHINFAIFLIIANIYSSASASTDISTVASPLFEGTEGCFL |
| OXA-1-like QKG33210.1     | P.a.   | MKNTIHHINFAIFLIIANIYSSASASTDISTVASPLFEGTEGCFL |
| OXA-1-like QOC40829.1     | K.p.   | MKNTIHHINFAIFLIIANIYSSASASTDISTVASPLFEGTEGCFL |
| OXA-1-like QLF61683.1     | K.p.   | MKNTIHHINFAIFLIIANIYSSASASTDISTVASPLFEGTEGCFL |
| OXA-1-like ANP63432.1     | P.a.   | MKNTIHHINFAIFLIIANIYSSASASTDISTVASPLFEGTEGCFL |
| OXA-1-like QII98525.1     | P.a.   | MKNTIHHINFAIFLIIANIYSSASASTDISTVASPLFEGTEGCFL |
| OXA-1-like AXL78701.1     | P.a.   | MKNTIHHINFAIFLIIANIYSSASASTDISTVASPLFEGTEGCFL |
| OXA-1-like QEL33624.1     | E.spp. | MKNTIHHINFAIFLIIANIYSSASASTDISTVASPLFEGTEGCFL |
| OXA-1-like QCZ41047.1     | E.spp. | MKNTIHHINFAIFLIIANIYSSASASTDISTVASPLFEGTEGCFL |
| OXA-1-like QP060228.1     | E.spp. | MKNTIHHINFAIFLIIANIYSSASASTDISTVASPLFEGTEGCFL |
| OXA-1-like ATW95033.1     | E.spp. | MKNTIHHINFAIFLIIANIYSSASASTDISTVASPLFEGTEGCFL |
| OXA-1-like QBB08468.1     | E.spp. | MKNTIHHINFAIFLIIANIYSSASASTDISTVASPLFEGTEGCFL |
| OXA-1-like QFH57730.1     | E.spp. | MKNTIHHINFAIFLIIANIYSSASASTDISTVASPLFEGTEGCFL |
| OXA-1-like QFI25362.1     | E.spp. | MKNTIHHINFAIFLIIANIYSSASASTDISTVASPLFEGTEGCFL |
| OXA-1-like QHC80210.1     | E.spp. | MKNTIHHINFAIFLIIANIYSSASASTDISTVASPLFEGTEGCFL |
| OXA-1-like QMT04262.1     | E.spp. | MKNTIHHINFAIFLIIANIYSSASASTDISTVASPLFEGTEGCFL |
| OXA-1-like QPD73921.1     | E.spp. | MKNTIHHINFAIFLIIANIYSSASASTDISTVASPLFEGTEGCFL |
| OXA-1-like QPO69359.1     | E.spp. | MKNTIHHINFAIFLIIANIYSSASASTDISTVASPLFEGTEGCFL |
| OXA-1-like QPO94996.1     | E.spp. | MKNTIHHINFAIFLIIANIYSSASASTDISTVASPLFEGTEGCFL |
| OXA-1-like QQA69926.1     | E.spp. | MKNTIHHINFAIFLIIANIYSSASASTDISTVASPLFEGTEGCFL |
| OXA-1-like ASP02997.1     | E.spp. | MKNTIHHINFAIFLIIANIYSSASASTDISTVASPLFEGTEGCFL |
| OXA-1-like AOF07832.1     | K.p.   | MKNTIHHINFAIFLIIANIYSSASASTDISTVASPLFEGTEGCFL |
| OXA-1-like APD44928.1     | K.p.   | MKNTIHHINFAIFLIIANIYSSASASTDISTVASPLFEGTEGCFL |
| OXA-1-like AWF45003.1     | K.p.   | MKNTIHHINFAIFLIIANIYSSASASTDISTVASPLFEGTEGCFL |
| OXA-1-like AWW26315.1     | K.p.   | MKNTIHHINFAIFLIIANIYSSASASTDISTVASPLFEGTEGCFL |
| OXA-1-like BBE66685.1     | K.p.   | MKNTIHHINFAIFLIIANIYSSASASTDISTVASPLFEGTEGCFL |
| OXA-1-like AR49869.1      | K.p.   | MKNTIHHINFAIFLIIANIYSSASASTDISTVASPLFEGTEGCFL |
| OXA-1-like ART03029.1     | K.p.   | MKNTIHHINFAIFLIIANIYSSASASTDISTVASPLFEGTEGCFL |
| OXA-1-like ART14043.1     | K.p.   | MKNTIHHINFAIFLIIANIYSSASASTDISTVASPLFEGTEGCFL |
| OXA-1-like AT008041.1     | K.p.   | MKNTIHHINFAIFLIIANIYSSASASTDISTVASPLFEGTEGCFL |
| OXA-1-like ATQ97012.1     | K.p.   | MKNTIHHINFAIFLIIANIYSSASASTDISTVASPLFEGTEGCFL |
| OXA-1-like AUD20317.1     | K.p.   | MKNTIHHINFAIFLIIANIYSSASASTDISTVASPLFEGTEGCFL |
| OXA-1-like AUD31186.1     | K.p.   | MKNTIHHINFAIFLIIANIYSSASASTDISTVASPLFEGTEGCFL |
| OXA-1-like AUD36737.1     | K.p.   | MKNTIHHINFAIFLIIANIYSSASASTDISTVASPLFEGTEGCFL |
| OXA-1-like AVF14577.1     | K.p.   | MKNTIHHINFAIFLIIANIYSSASASTDISTVASPLFEGTEGCFL |
| OXA-1-like AWC05483.1     | K.p.   | MKNTIHHINFAIFLIIANIYSSASASTDISTVASPLFEGTEGCFL |
| OXA-1-like QAZ99397.1     | K.p.   | MKNTIHHINFAIFLIIANIYSSASASTDISTVASPLFEGTEGCFL |
| OXA-1-like QIF88052.1     | K.p.   | MKNTIHHINFAIFLIIANIYSSASASTDISTVASPLFEGTEGCFL |
| OXA-1-like QLF61156.1     | K.p.   | MKNTIHHINFAIFLIIANIYSSASASTDISTVASPLFEGTEGCFL |
| OXA-1-like QLF66737.1     | K.p.   | MKNTIHHINFAIFLIIANIYSSASASTDISTVASPLFEGTEGCFL |
| OXA-1-like QLG18431.1     | K.p.   | MKNTIHHINFAIFLIIANIYSSASASTDISTVASPLFEGTEGCFL |
| OXA-1-like AIT04829.1     | K.p.   | MKNTIHHINFAIFLIIANIYSSASASTDISTVASPLFEGTEGCFL |
| OXA-1-like AKE78741.1     | K.p.   | MKNTIHHINFAIFLIIANIYSSASASTDISTVASPLFEGTEGCFL |
| OXA-1-like ANK19483.1     | K.p.   | MKNTIHHINFAIFLIIANIYSSASASTDISTVASPLFEGTEGCFL |
| OXA-1-like AOF02731.1     | K.p.   | MKNTIHHINFAIFLIIANIYSSASASTDISTVASPLFEGTEGCFL |
| OXA-1-like APB53840.1     | K.p.   | MKNTIHHINFAIFLIIANIYSSASASTDISTVASPLFEGTEGCFL |
| OXA-1-like APM47234.1     | K.p.   | MKNTIHHINFAIFLIIANIYSSASASTDISTVASPLFEGTEGCFL |
| OXA-1-like APM56693.1     | K.p.   | MKNTIHHINFAIFLIIANIYSSASASTDISTVASPLFEGTEGCFL |
| OXA-1-like APM62285.1     | K.p.   | MKNTIHHINFAIFLIIANIYSSASASTDISTVASPLFEGTEGCFL |
| OXA-1-like APM67903.1     | K.p.   | MKNTIHHINFAIFLIIANIYSSASASTDISTVASPLFEGTEGCFL |
| OXA-1-like APP44482.1     | K.p.   | MKNTIHHINFAIFLIIANIYSSASASTDISTVASPLFEGTEGCFL |
| OXA-1-like APQ29072.1     | K.p.   | MKNTIHHINFAIFLIIANIYSSASASTDISTVASPLFEGTEGCFL |
| OXA-1-like APR51020.1     | K.p.   | MKNTIHHINFAIFLIIANIYSSASASTDISTVASPLFEGTEGCFL |
| OXA-1-like ARM26101.1     | K.p.   | MKNTIHHINFAIFLIIANIYSSASASTDISTVASPLFEGTEGCFL |
| OXA-1-like ARM26250.1     | K.p.   | MKNTIHHINFAIFLIIANIYSSASASTDISTVASPLFEGTEGCFL |
| OXA-1-like ART14424.1     | K.p.   | MKNTIHHINFAIFLIIANIYSSASASTDISTVASPLFEGTEGCFL |
| OXA-1-like ARX22868.1     | K.p.   | MKNTIHHINFAIFLIIANIYSSASASTDISTVASPLFEGTEGCFL |
| OXA-1-like ARZ96561.1     | K.p.   | MKNTIHHINFAIFLIIANIYSSASASTDISTVASPLFEGTEGCFL |
| OXA-1-like ASC31826.1     | K.p.   | MKNTIHHINFAIFLIIANIYSSASASTDISTVASPLFEGTEGCFL |
| OXA-1-like QIF55803.1     | K.p.   | MKNTIHHINFAIFLIIANIYSSASASTDISTVASPLFEGTEGCFL |
| OXA-1-like QIF55813.1     | K.p.   | MKNTIHHINFAIFLIIANIYSSASASTDISTVASPLFEGTEGCFL |
| OXA-1-like VAX91792.1     | K.p.   | MKNTIHHINFAIFLIIANIYSSASASTDISTVASPLFEGTEGCFL |
| OXA-1-like VAX91482.1     | K.p.   | MKNTIHHINFAIFLIIANIYSSASASTDISTVASPLFEGTEGCFL |
| OXA-1-like QQL36550.1     | K.p.   | MKNTIHHINFAIFLIIANIYSSASASTDISTVASPLFEGTEGCFL |
| OXA-1-like QPP73193.1     | K.p.   | MKNTIHHINFAIFLIIANIYSSASASTDISTVASPLFEGTEGCFL |
| OXA-1-like QPJ20091.1     | K.p.   | MKNTIHHINFAIFLIIANIYSSASASTDISTVASPLFEGTEGCFL |
| OXA-1-like QPB99042.1     | K.p.   | MKNTIHHINFAIFLIIANIYSSASASTDISTVASPLFEGTEGCFL |
| OXA-1-like QPA13355.1     | K.p.   | MKNTIHHINFAIFLIIANIYSSASASTDISTVASPLFEGTEGCFL |

## OXA-1-like subfamily

|                              |                 |                             |                      |
|------------------------------|-----------------|-----------------------------|----------------------|
| OXA-1-like_QDZ35954.1 K.p.   | .....           | MKNTIHHINFAIFLLIIANIIYSSASA | STDISTVASPLFEGTEGCFL |
| OXA-1-like_QCX07927.1 K.p.   | .....           | MKNTIHHINFAIFLLIIANIIYSSASA | STDISTVASPLFEGTEGCFL |
| OXA-1-like_QBH11436.1 K.p.   | .....           | MKNTIHHINFAIFLLIIANIIYSSASA | STDISTVASPLFEGTEGCFL |
| OXA-1-like_QBF99632.1 K.p.   | .....           | MKNTIHHINFAIFLLIIANIIYSSASA | STDISTVASPLFEGTEGCFL |
| OXA-1-like_QBD88840.1 K.p.   | .....           | MKNTIHHINFAIFLLIIANIIYSSASA | STDISTVASPLFEGTEGCFL |
| OXA-1-like_QBA36467.1 K.p.   | .....           | MKNTIHHINFAIFLLIIANIIYSSASA | STDISTVASPLFEGTEGCFL |
| OXA-1-like_QAZ94541.1 K.p.   | .....           | MKNTIHHINFAIFLLIIANIIYSSASA | STDISTVASPLFEGTEGCFL |
| OXA-1-like_BBE58940.1 K.p.   | .....           | MKNTIHHINFAIFLLIIANIIYSSASA | STDISTVASPLFEGTEGCFL |
| OXA-1-like_BBE06733.1 K.p.   | .....           | MKNTIHHINFAIFLLIIANIIYSSASA | STDISTVASPLFEGTEGCFL |
| OXA-1-like_AZI07357.1 K.p.   | .....           | MKNTIHHINFAIFLLIIANIIYSSASA | STDISTVASPLFEGTEGCFL |
| OXA-1-like_AZH52602.1 K.p.   | .....           | MKNTIHHINFAIFLLIIANIIYSSASA | STDISTVASPLFEGTEGCFL |
| OXA-1-like_AZG68296.1 K.p.   | .....           | MKNTIHHINFAIFLLIIANIIYSSASA | STDISTVASPLFEGTEGCFL |
| OXA-1-like_AZG62714.1 K.p.   | .....           | MKNTIHHINFAIFLLIIANIIYSSASA | STDISTVASPLFEGTEGCFL |
| OXA-1-like_AYD37605.1 K.p.   | .....           | MKNTIHHINFAIFLLIIANIIYSSASA | STDISTVASPLFEGTEGCFL |
| OXA-1-like_AXZ62257.1 K.p.   | .....           | MKNTIHHINFAIFLLIIANIIYSSASA | STDISTVASPLFEGTEGCFL |
| OXA-1-like_AXZ56762.1 K.p.   | .....           | MKNTIHHINFAIFLLIIANIIYSSASA | STDISTVASPLFEGTEGCFL |
| OXA-1-like_AXZ10749.1 K.p.   | .....           | MKNTIHHINFAIFLLIIANIIYSSASA | STDISTVASPLFEGTEGCFL |
| OXA-1-like_AWR57732.1 K.p.   | .....           | MKNTIHHINFAIFLLIIANIIYSSASA | STDISTVASPLFEGTEGCFL |
| OXA-1-like_AWQ55663.1 K.p.   | .....           | MKNTIHHINFAIFLLIIANIIYSSASA | STDISTVASPLFEGTEGCFL |
| OXA-1-like_AWQ55646.1 K.p.   | .....           | MKNTIHHINFAIFLLIIANIIYSSASA | STDISTVASPLFEGTEGCFL |
| OXA-1-like_AWQ55645.1 K.p.   | .....           | MKNTIHHINFAIFLLIIANIIYSSASA | STDISTVASPLFEGTEGCFL |
| OXA-1-like_AW049662.1 K.p.   | .....           | MKNTIHHINFAIFLLIIANIIYSSASA | STDISTVASPLFEGTEGCFL |
| OXA-1-like_AW044383.1 K.p.   | .....           | MKNTIHHINFAIFLLIIANIIYSSASA | STDISTVASPLFEGTEGCFL |
| OXA-1-like_AW039120.1 K.p.   | .....           | MKNTIHHINFAIFLLIIANIIYSSASA | STDISTVASPLFEGTEGCFL |
| OXA-1-like_AWC00236.1 K.p.   | .....           | MKNTIHHINFAIFLLIIANIIYSSASA | STDISTVASPLFEGTEGCFL |
| OXA-1-like_AWA71813.1 K.p.   | .....           | MKNTIHHINFAIFLLIIANIIYSSASA | STDISTVASPLFEGTEGCFL |
| OXA-1-like_AVO80920.1 K.p.   | .....           | MKNTIHHINFAIFLLIIANIIYSSASA | STDISTVASPLFEGTEGCFL |
| OXA-1-like_AUX60365.1 K.p.   | .....           | MKNTIHHINFAIFLLIIANIIYSSASA | STDISTVASPLFEGTEGCFL |
| OXA-1-like_ATR77794.1 K.p.   | .....           | MKNTIHHINFAIFLLIIANIIYSSASA | STDISTVASPLFEGTEGCFL |
| OXA-1-like_ATR72263.1 K.p.   | .....           | MKNTIHHINFAIFLLIIANIIYSSASA | STDISTVASPLFEGTEGCFL |
| OXA-1-like_ATR66734.1 K.p.   | .....           | MKNTIHHINFAIFLLIIANIIYSSASA | STDISTVASPLFEGTEGCFL |
| OXA-1-like_ATR61171.1 K.p.   | .....           | MKNTIHHINFAIFLLIIANIIYSSASA | STDISTVASPLFEGTEGCFL |
| OXA-1-like_ATR39902.1 K.p.   | .....           | MKNTIHHINFAIFLLIIANIIYSSASA | STDISTVASPLFEGTEGCFL |
| OXA-1-like_ATR34406.1 K.p.   | .....           | MKNTIHHINFAIFLLIIANIIYSSASA | STDISTVASPLFEGTEGCFL |
| OXA-1-like_ATR28842.1 K.p.   | .....           | MKNTIHHINFAIFLLIIANIIYSSASA | STDISTVASPLFEGTEGCFL |
| OXA-1-like_ATR07462.1 K.p.   | .....           | MKNTIHHINFAIFLLIIANIIYSSASA | STDISTVASPLFEGTEGCFL |
| OXA-1-like_ATQ91613.1 K.p.   | .....           | MKNTIHHINFAIFLLIIANIIYSSASA | STDISTVASPLFEGTEGCFL |
| OXA-1-like_ATQ27236.1 K.p.   | .....           | MKNTIHHINFAIFLLIIANIIYSSASA | STDISTVASPLFEGTEGCFL |
| OXA-1-like_ASC42867.1 K.p.   | .....           | MKNTIHHINFAIFLLIIANIIYSSASA | STDISTVASPLFEGTEGCFL |
| OXA-1-like_QKK74875.1 K.p.   | MLAVKIKPFTKPILI | MKNTIHHINFAIFLLIIANIIYSSASA | STDISTVASPLFEGTEGCFL |
| OXA-1-like_ATM40508.1 K.p.   | .....           | MKNTIHHINFAIFLLIIANIIYSSASA | STDISTVASPLFEGTEGCFL |
| OXA-1-like_ATM68467.1 K.p.   | .....           | MKNTIHHINFAIFLLIIANIIYSSASA | STDISTVASPLFEGTEGCFL |
| OXA-1-like_ASC37513.1 K.p.   | .....           | MKNTIHHINFAIFLLIIANIIYSSASA | STDISTVASPLFEGTEGCFL |
| OXA-1-like_AQU64164.1 K.p.   | MLAVKIKPFTKPILI | MKNTIHHINFAIFLLIIANIIYSSASA | STDISTVASPLFEGTEGCFL |
| OXA-1-like_AQU64317.1 K.p.   | MLAVKIKPFTKPILI | MKNTIHHINFAIFLLIIANIIYSSASA | STDISTVASPLFEGTEGCFL |
| OXA-1-like_APV28290.1 K.p.   | MLAVKIKPFTKPILI | MKNTIHHINFAIFLLIIANIIYSSASA | STDISTVASPLFEGTEGCFL |
| OXA-1-like_APV22515.1 K.p.   | MLAVKIKPFTKPILI | MKNTIHHINFAIFLLIIANIIYSSASA | STDISTVASPLFEGTEGCFL |
| OXA-1-like_ANF44129.1 K.p.   | MLAVKIKPFTKPILI | MKNTIHHINFAIFLLIIANIIYSSASA | STDISTVASPLFEGTEGCFL |
| OXA-1-like_AIG86468.1 K.p.   | MLAVKIKPFTKPILI | MKNTIHHINFAIFLLIIANIIYSSASA | STDISTVASPLFEGTEGCFL |
| OXA-1-like_AHI38983.1 K.p.   | MLAVKIKPFTKPILI | MKNTIHHINFAIFLLIIANIIYSSASA | STDISTVASPLFEGTEGCFL |
| OXA-1-like_QCP74266.1 P.a.   | .....           | MKNTIHHINFAIFLLIIANIIYSSASA | STDISTVASPLFEGTEGCFL |
| OXA-1-like_QDE47052.1 E.spp. | .....           | MKNTIHHINFAIFLLIIANIIYSSASA | STDISTVASPLFEGTEGCFL |

acc



OXA-1-like subfamily

*OXA-1-like\_BBE55408.1\_K.p.*

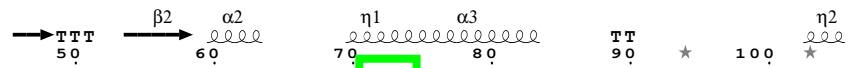

OXA-1-like\_BBE55408.1\_K.p.  
 1M6K\_beta-lactamase\_OXA-1-like\_AKV27274.1\_P.a.  
 OXA-1-like\_AWE78522.1\_P.a.  
 OXA-1-like\_QLA55054.1\_P.a.  
 OXA-1-like\_QKG33210.1\_P.a.  
 OXA-1-like\_QC40829.1\_K.p.  
 OXA-1-like\_QLF61683.1\_K.p.  
 OXA-1-like\_ANP63432.1\_P.a.  
 OXA-1-like\_QLI198525.1\_P.a.  
 OXA-1-like\_AXL178701.1\_P.a.  
 OXA-1-like\_QEL133624.1\_E.spp.  
 OXA-1-like\_QC241047.1\_E.spp.  
 OXA-1-like\_QPO60228.1\_E.spp.  
 OXA-1-like\_ATW95033.1\_E.spp.  
 OXA-1-like\_QBH84468.1\_E.spp.  
 OXA-1-like\_QFB57730.1\_E.spp.  
 OXA-1-like\_QFT25362.1\_E.spp.  
 OXA-1-like\_QHC02010.1\_E.spp.  
 OXA-1-like\_QMT04262.1\_E.spp.  
 OXA-1-like\_QPD73921.1\_E.spp.  
 OXA-1-like\_QPO69359.1\_E.spp.  
 OXA-1-like\_QPO49496.1\_E.spp.  
 OXA-1-like\_QQA69926.1\_E.spp.  
 OXA-1-like\_ASP07937.1\_E.spp.  
 OXA-1-like\_ASF07892.1\_K.p.  
 OXA-1-like\_APD44928.1\_K.p.  
 OXA-1-like\_AWF45003.1\_K.p.  
 OXA-1-like\_AWX26315.1\_K.p.  
 OXA-1-like\_BBE66685.1\_K.p.  
 OXA-1-like\_ARA49869.1\_K.p.  
 OXA-1-like\_ART03029.1\_K.p.  
 OXA-1-like\_ART14043.1\_K.p.  
 OXA-1-like\_ATO08041.1\_K.p.  
 OXA-1-like\_AU297012.1\_K.p.  
 OXA-1-like\_AUD20317.1\_K.p.  
 OXA-1-like\_AUD31186.1\_K.p.  
 OXA-1-like\_AUD36737.1\_K.p.  
 OXA-1-like\_AVF14577.1\_K.p.  
 OXA-1-like\_AWC05483.1\_K.p.  
 OXA-1-like\_QAO299397.1\_K.p.  
 OXA-1-like\_QLF88052.1\_K.p.  
 OXA-1-like\_QLF61156.1\_K.p.  
 OXA-1-like\_QLF66737.1\_K.p.  
 OXA-1-like\_QLG18431.1\_K.p.  
 OXA-1-like\_AI704829.1\_K.p.  
 OXA-1-like\_AKE87741.1\_K.p.  
 OXA-1-like\_ANK19483.1\_K.p.  
 OXA-1-like\_APO2731.1\_K.p.  
 OXA-1-like\_APB85840.1\_K.p.  
 OXA-1-like\_APM47234.1\_K.p.  
 OXA-1-like\_APM56693.1\_K.p.  
 OXA-1-like\_APM662285.1\_K.p.  
 OXA-1-like\_APM67903.1\_K.p.  
 OXA-1-like\_APF44482.1\_K.p.  
 OXA-1-like\_APO29072.1\_K.p.  
 OXA-1-like\_APR51020.1\_K.p.  
 OXA-1-like\_ARM26101.1\_K.p.  
 OXA-1-like\_ARM26250.1\_K.p.  
 OXA-1-like\_ART14424.1\_K.p.  
 OXA-1-like\_ARX22868.1\_K.p.  
 OXA-1-like\_ARZ96561.1\_K.p.  
 OXA-1-like\_ASC31826.1\_K.p.  
 OXA-1-like\_QIF55803.1\_K.p.  
 OXA-1-like\_QIF55813.1\_K.p.  
 OXA-1-like\_VAX91792.1\_K.p.  
 OXA-1-like\_VAX91482.1\_K.p.  
 OXA-1-like\_QQT36550.1\_K.p.  
 OXA-1-like\_QPP73193.1\_K.p.  
 OXA-1-like\_QP20091.1\_K.p.  
 OXA-1-like\_QPB99042.1\_K.p.  
 OXA-1-like\_QPA13355.1\_K.p.  
 OXA-1-like\_QOU70610.1\_K.p.  
 OXA-1-like\_QOU05181.1\_K.p.  
 OXA-1-like\_QOU39182.1\_K.p.  
 OXA-1-like\_QOT97178.1\_K.p.  
 OXA-1-like\_QOD80635.1\_K.p.  
 OXA-1-like\_QOD80603.1\_K.p.  
 OXA-1-like\_QNB32204.1\_K.p.  
 OXA-1-like\_QMS74616.1\_K.p.  
 OXA-1-like\_QLT67472.1\_K.p.  
 OXA-1-like\_QLT33436.1\_K.p.  
 OXA-1-like\_QLT28063.1\_K.p.  
 OXA-1-like\_QLT22583.1\_K.p.  
 OXA-1-like\_QLI17177.1\_K.p.  
 OXA-1-like\_QLI11731.1\_K.p.  
 OXA-1-like\_QLC16052.1\_K.p.  
 OXA-1-like\_QLC05373.1\_K.p.  
 OXA-1-like\_QLC00088.1\_K.p.  
 OXA-1-like\_QLB94808.1\_K.p.  
 OXA-1-like\_QLB89468.1\_K.p.  
 OXA-1-like\_QLB84130.1\_K.p.  
 OXA-1-like\_QLB78789.1\_K.p.  
 OXA-1-like\_QLB73465.1\_K.p.  
 OXA-1-like\_QLR58461.1\_K.p.  
 OXA-1-like\_QHG08101.1\_K.p.  
 OXA-1-like\_QG285920.1\_K.p.  
 OXA-1-like\_QG280560.1\_K.p.  
 OXA-1-like\_QG767290.1\_K.p.  
 OXA-1-like\_QFY31451.1\_K.p.  
 OXA-1-like\_QFH43884.1\_K.p.  
 OXA-1-like\_QER51630.1\_K.p.  
 OXA-1-like\_QEG84620.1\_K.p.

[illegible]



OXA-1-like subfamily

OXA-1-like\_QD235954.1\_K.p.  
OXA-1-like\_QC807927.1\_K.p.  
OXA-1-like\_QBH11436.1\_K.p.  
OXA-1-like\_QBF99632.1\_K.p.  
OXA-1-like\_QBD88840.1\_K.p.  
OXA-1-like\_QBA36467.1\_K.p.  
OXA-1-like\_QAZ94541.1\_K.p.  
OXA-1-like\_BBE58940.1\_K.p.  
OXA-1-like\_BBE07633.1\_K.p.  
OXA-1-like\_AZT07357.1\_K.p.  
OXA-1-like\_AZH52602.1\_K.p.  
OXA-1-like\_AZG68296.1\_K.p.  
OXA-1-like\_AZG62714.1\_K.p.  
OXA-1-like\_AYD37605.1\_K.p.  
OXA-1-like\_AZ622257.1\_K.p.  
OXA-1-like\_AZ256762.1\_K.p.  
OXA-1-like\_AX210749.1\_K.p.  
OXA-1-like\_AWR57732.1\_K.p.  
OXA-1-like\_AWQ55663.1\_K.p.  
OXA-1-like\_AWQ55646.1\_K.p.  
OXA-1-like\_AWQ55645.1\_K.p.  
OXA-1-like\_AW049662.1\_K.p.  
OXA-1-like\_AW044383.1\_K.p.  
OXA-1-like\_AW039120.1\_K.p.  
OXA-1-like\_AWC00236.1\_K.p.  
OXA-1-like\_AWA71813.1\_K.p.  
OXA-1-like\_AV080920.1\_K.p.  
OXA-1-like\_AUX60365.1\_K.p.  
OXA-1-like\_ATR77794.1\_K.p.  
OXA-1-like\_ATR77263.1\_K.p.  
OXA-1-like\_ATR66734.1\_K.p.  
OXA-1-like\_ATR61171.1\_K.p.  
OXA-1-like\_ATR39902.1\_K.p.  
OXA-1-like\_ATR34406.1\_K.p.  
OXA-1-like\_ATR28842.1\_K.p.  
OXA-1-like\_ATR07462.1\_K.p.  
OXA-1-like\_ATQ91613.1\_K.p.  
OXA-1-like\_ATQ27236.1\_K.p.  
OXA-1-like\_ASC42867.1\_K.p.  
OXA-1-like\_QRK74875.1\_K.p.  
OXA-1-like\_ATM40508.1\_K.p.  
OXA-1-like\_ATM68467.1\_K.p.  
OXA-1-like\_ASC37513.1\_K.p.  
OXA-1-like\_AQU64164.1\_K.p.  
OXA-1-like\_AQU64317.1\_K.p.  
OXA-1-like\_APV28290.1\_K.p.  
OXA-1-like\_APIV22515.1\_K.p.  
OXA-1-like\_ANF44129.1\_K.p.  
OXA-1-like\_AHG86468.1\_K.p.  
OXA-1-like\_AH138983.1\_K.p.  
OXA-1-like\_QCP74266.1\_P.a.  
OXA-1-like\_QDE47052.1\_E.spp.

[illegible]

OXA-1-like subfamily

| OXA-1-like BBE55408.1_K.p.   | α4                    |                   |     |                     | α5  |     |     |     | α6  |     |     |     | α7  |     |     |     |
|------------------------------|-----------------------|-------------------|-----|---------------------|-----|-----|-----|-----|-----|-----|-----|-----|-----|-----|-----|-----|
|                              | 110                   | 120               | 130 | 140                 | 150 | 160 | 170 | 180 | 190 | 200 | 210 | 220 | 230 | 240 | 250 | 260 |
| OXA-1-like BBE55408.1_K.p.   | NSNHTPKTWMQFSVVVWSQEI | ITQKIGLNKIKNYLKDF | YGN | QDFSGDKERNNGLTEAWLE |     |     |     |     |     |     |     |     |     |     |     |     |
| 1M6K_beta-lactamase_OXA-1    | NSNHTPKTWMQFSVVVWSQEI | ITQKIGLNKIKNYLKDF | YGN | QDFSGDKERNNGLTEAWLE |     |     |     |     |     |     |     |     |     |     |     |     |
| OXA-1-like AVK27274.1_P.a.   | NSNHTPKTWMQFSVVVWSQEI | ITQKIGLNKIKNYLKDF | YGN | QDFSGDKERNNGLTEAWLE |     |     |     |     |     |     |     |     |     |     |     |     |
| OXA-1-like AWE78522.1_P.a.   | NSNHTPKTWMQFSVVVWSQEI | ITQKIGLNKIKNYLKDF | YGN | QDFSGDKERNNGLTEAWLE |     |     |     |     |     |     |     |     |     |     |     |     |
| OXA-1-like QLA55054.1_P.a.   | NSNHTPKTWMQFSVVVWSQEI | ITQKIGLNKIKNYLKDF | YGN | QDFSGDKERNNGLTEAWLE |     |     |     |     |     |     |     |     |     |     |     |     |
| OXA-1-like QKG33210.1_P.a.   | NSNHTPKTWMQFSVVVWSQEI | ITQKIGLNKIKNYLKDF | YGN | QDFSGDKERNNGLTEAWLE |     |     |     |     |     |     |     |     |     |     |     |     |
| OXA-1-like QOC40829.1_K.p.   | NSNHTPKTWMQFSVVVWSQEI | ITQKIGLNKIKNYLKDF | YGN | QDFSGDKERNNGLTEAWLE |     |     |     |     |     |     |     |     |     |     |     |     |
| OXA-1-like QLF61683.1_K.p.   | NSNHTPKTWMQFSVVVWSQEI | ITQKIGLNKIKNYLKDF | YGN | QDFSGDKERNNGLTEAWLE |     |     |     |     |     |     |     |     |     |     |     |     |
| OXA-1-like ANP63432.1_P.a.   | NSNHTPKTWMQFSVVVWSQEI | ITQKIGLNKIKNYLKDF | YGN | QDFSGDKERNNGLTEAWLE |     |     |     |     |     |     |     |     |     |     |     |     |
| OXA-1-like QI198525.1_P.a.   | NSNHTPKTWMQFSVVVWSQEI | ITQKIGLNKIKNYLKDF | YGN | QDFSGDKERNNGLTEAWLE |     |     |     |     |     |     |     |     |     |     |     |     |
| OXA-1-like AXL178701.1_P.a.  | NSNHTPKTWMQFSVVVWSQEI | ITQKIGLNKIKNYLKDF | YGN | QDFSGDKERNNGLTEAWLE |     |     |     |     |     |     |     |     |     |     |     |     |
| OXA-1-like QEI33624.1_E.spp. | NSNHTPKTWMQFSVVVWSQEI | ITQKIGLNKIKNYLKDF | YGN | QDFSGDKERNNGLTEAWLE |     |     |     |     |     |     |     |     |     |     |     |     |
| OXA-1-like QCZ41047.1_E.spp. | NSNHTPKTWMQFSVVVWSQEI | ITQKIGLNKIKNYLKDF | YGN | QDFSGDKERNNGLTEAWLE |     |     |     |     |     |     |     |     |     |     |     |     |
| OXA-1-like QPO60228.1_E.spp. | NSNHTPKTWMQFSVVVWSQEI | ITQKIGLNKIKNYLKDF | YGN | QDFSGDKERNNGLTEAWLE |     |     |     |     |     |     |     |     |     |     |     |     |
| OXA-1-like ATW95033.1_E.spp. | NSNHTPKTWMQFSVVVWSQEI | ITQKIGLNKIKNYLKDF | YGN | QDFSGDKERNNGLTEAWLE |     |     |     |     |     |     |     |     |     |     |     |     |
| OXA-1-like QBB08468.1_E.spp. | NSNHTPKTWMQFSVVVWSQEI | ITQKIGLNKIKNYLKDF | YGN | QDFSGDKERNNGLTEAWLE |     |     |     |     |     |     |     |     |     |     |     |     |
| OXA-1-like QFH57730.1_E.spp. | NSNHTPKTWMQFSVVVWSQEI | ITQKIGLNKIKNYLKDF | YGN | QDFSGDKERNNGLTEAWLE |     |     |     |     |     |     |     |     |     |     |     |     |
| OXA-1-like QFT25362.1_E.spp. | NSNHTPKTWMQFSVVVWSQEI | ITQKIGLNKIKNYLKDF | YGN | QDFSGDKERNNGLTEAWLE |     |     |     |     |     |     |     |     |     |     |     |     |
| OXA-1-like QHC80210.1_E.spp. | NSNHTPKTWMQFSVVVWSQEI | ITQKIGLNKIKNYLKDF | YGN | QDFSGDKERNNGLTEAWLE |     |     |     |     |     |     |     |     |     |     |     |     |
| OXA-1-like QMC04262.1_E.spp. | NSNHTPKTWMQFSVVVWSQEI | ITQKIGLNKIKNYLKDF | YGN | QDFSGDKERNNGLTEAWLE |     |     |     |     |     |     |     |     |     |     |     |     |
| OXA-1-like QPD73921.1_E.spp. | NSNHTPKTWMQFSVVVWSQEI | ITQKIGLNKIKNYLKDF | YGN | QDFSGDKERNNGLTEAWLE |     |     |     |     |     |     |     |     |     |     |     |     |
| OXA-1-like QPO69359.1_E.spp. | NSNHTPKTWMQFSVVVWSQEI | ITQKIGLNKIKNYLKDF | YGN | QDFSGDKERNNGLTEAWLE |     |     |     |     |     |     |     |     |     |     |     |     |
| OXA-1-like QQA94996.1_E.spp. | NSNHTPKTWMQFSVVVWSQEI | ITQKIGLNKIKNYLKDF | YGN | QDFSGDKERNNGLTEAWLE |     |     |     |     |     |     |     |     |     |     |     |     |
| OXA-1-like QQA69926.1_E.spp. | NSNHTPKTWMQFSVVVWSQEI | ITQKIGLNKIKNYLKDF | YGN | QDFSGDKERNNGLTEAWLE |     |     |     |     |     |     |     |     |     |     |     |     |
| OXA-1-like ASP02997.1_E.spp. | NSNHTPKTWMQFSVVVWSQEI | ITQKIGLNKIKNYLKDF | YGN | QDFSGDKERNNGLTEAWLE |     |     |     |     |     |     |     |     |     |     |     |     |
| OXA-1-like AOF07832.1_K.p.   | NSNHTPKTWMQFSVVVWSQEI | ITQKIGLNKIKNYLKDF | YGN | QDFSGDKERNNGLTEAWLE |     |     |     |     |     |     |     |     |     |     |     |     |
| OXA-1-like APD44928.1_K.p.   | NSNHTPKTWMQFSVVVWSQEI | ITQKIGLNKIKNYLKDF | YGN | QDFSGDKERNNGLTEAWLE |     |     |     |     |     |     |     |     |     |     |     |     |
| OXA-1-like AWF45003.1_K.p.   | NSNHTPKTWMQFSVVVWSQEI | ITQKIGLNKIKNYLKDF | YGN | QDFSGDKERNNGLTEAWLE |     |     |     |     |     |     |     |     |     |     |     |     |
| OXA-1-like AWF42631.1_K.p.   | NSNHTPKTWMQFSVVVWSQEI | ITQKIGLNKIKNYLKDF | YGN | QDFSGDKERNNGLTEAWLE |     |     |     |     |     |     |     |     |     |     |     |     |
| OXA-1-like BBE66685.1_K.p.   | NSN                   |                   |     |                     |     |     |     |     |     |     |     |     |     |     |     |     |

[illegible]

acc



OXA-1-like subfamily

*OXA-1-like\_BBE55408.1\_K.p.*

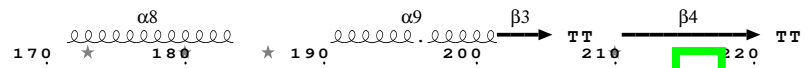[illegible]

# OXA-1-like subfamily

|                              |                                   |                              |
|------------------------------|-----------------------------------|------------------------------|
| OXA-1-like_QDZ35954.1 K.p.   | SSLKISPEEQIQFLRKIIINHNLVPVKNSAIEN | TIENMYLQDLDNSTKLYGKTGAGFTANR |
| OXA-1-like_QCX07927.1 K.p.   | SSLKISPEEQIQFLRKIIINHNLVPVKNSAIEN | TIENMYLQDLDNSTKLYGKTGAGFTANR |
| OXA-1-like_QBH11436.1 K.p.   | SSLKISPEEQIQFLRKIIINHNLVPVKNSAIEN | TIENMYLQDLDNSTKLYGKTGAGFTANR |
| OXA-1-like_QBF99632.1 K.p.   | SSLKISPEEQIQFLRKIIINHNLVPVKNSAIEN | TIENMYLQDLDNSTKLYGKTGAGFTANR |
| OXA-1-like_QBD88840.1 K.p.   | SSLKISPEEQIQFLRKIIINHNLVPVKNSAIEN | TIENMYLQDLDNSTKLYGKTGAGFTANR |
| OXA-1-like_QBA36467.1 K.p.   | SSLKISPEEQIQFLRKIIINHNLVPVKNSAIEN | TIENMYLQDLDNSTKLYGKTGAGFTANR |
| OXA-1-like_QAZ94541.1 K.p.   | SSLKISPEEQIQFLRKIIINHNLVPVKNSAIEN | TIENMYLQDLDNSTKLYGKTGAGFTANR |
| OXA-1-like_BBE58940.1 K.p.   | SSLKISPEEQIQFLRKIIINHNLVPVKNSAIEN | TIENMYLQDLDNSTKLYGKTGAGFTANR |
| OXA-1-like_BBE06733.1 K.p.   | SSLKISPEEQIQFLRKIIINHNLVPVKNSAIEN | TIENMYLQDLDNSTKLYGKTGAGFTANR |
| OXA-1-like_AZI07357.1 K.p.   | SSLKISPEEQIQFLRKIIINHNLVPVKNSAIEN | TIENMYLQDLDNSTKLYGKTGAGFTANR |
| OXA-1-like_AZH52602.1 K.p.   | SSLKISPEEQIQFLRKIIINHNLVPVKNSAIEN | TIENMYLQDLDNSTKLYGKTGAGFTANR |
| OXA-1-like_AZG68296.1 K.p.   | SSLKISPEEQIQFLRKIIINHNLVPVKNSAIEN | TIENMYLQDLDNSTKLYGKTGAGFTANR |
| OXA-1-like_AZG62714.1 K.p.   | SSLKISPEEQIQFLRKIIINHNLVPVKNSAIEN | TIENMYLQDLDNSTKLYGKTGAGFTANR |
| OXA-1-like_AYD37605.1 K.p.   | SSLKISPEEQIQFLRKIIINHNLVPVKNSAIEN | TIENMYLQDLDNSTKLYGKTGAGFTANR |
| OXA-1-like_AXZ62257.1 K.p.   | SSLKISPEEQIQFLRKIIINHNLVPVKNSAIEN | TIENMYLQDLDNSTKLYGKTGAGFTANR |
| OXA-1-like_AXZ56762.1 K.p.   | SSLKISPEEQIQFLRKIIINHNLVPVKNSAIEN | TIENMYLQDLDNSTKLYGKTGAGFTANR |
| OXA-1-like_AXZ10749.1 K.p.   | SSLKISPEEQIQFLRKIIINHNLVPVKNSAIEN | TIENMYLQDLDNSTKLYGKTGAGFTANR |
| OXA-1-like_AWR57732.1 K.p.   | SSLKISPEEQIQFLRKIIINHNLVPVKNSAIEN | TIENMYLQDLDNSTKLYGKTGAGFTANR |
| OXA-1-like_AWQ55663.1 K.p.   | SSLKISPEEQIQFLRKIIINHNLVPVKNSAIEN | TIENMYLQDLDNSTKLYGKTGAGFTANR |
| OXA-1-like_AWQ55646.1 K.p.   | SSLKISPEEQIQFLRKIIINHNLVPVKNSAIEN | TIENMYLQDLDNSTKLYGKTGAGFTANR |
| OXA-1-like_AWQ55645.1 K.p.   | SSLKISPEEQIQFLRKIIINHNLVPVKNSAIEN | TIENMYLQDLDNSTKLYGKTGAGFTANR |
| OXA-1-like_AWQ49662.1 K.p.   | SSLKISPEEQIQFLRKIIINHNLVPVKNSAIEN | TIENMYLQDLDNSTKLYGKTGAGFTANR |
| OXA-1-like_AWQ44383.1 K.p.   | SSLKISPEEQIQFLRKIIINHNLVPVKNSAIEN | TIENMYLQDLDNSTKLYGKTGAGFTANR |
| OXA-1-like_AWQ39120.1 K.p.   | SSLKISPEEQIQFLRKIIINHNLVPVKNSAIEN | TIENMYLQDLDNSTKLYGKTGAGFTANR |
| OXA-1-like_AWC00236.1 K.p.   | SSLKISPEEQIQFLRKIIINHNLVPVKNSAIEN | TIENMYLQDLDNSTKLYGKTGAGFTANR |
| OXA-1-like_AWA71813.1 K.p.   | SSLKISPEEQIQFLRKIIINHNLVPVKNSAIEN | TIENMYLQDLDNSTKLYGKTGAGFTANR |
| OXA-1-like_AVO80920.1 K.p.   | SSLKISPEEQIQFLRKIIINHNLVPVKNSAIEN | TIENMYLQDLDNSTKLYGKTGAGFTANR |
| OXA-1-like_AUX60365.1 K.p.   | SSLKISPEEQIQFLRKIIINHNLVPVKNSAIEN | TIENMYLQDLDNSTKLYGKTGAGFTANR |
| OXA-1-like_ATR77794.1 K.p.   | SSLKISPEEQIQFLRKIIINHNLVPVKNSAIEN | TIENMYLQDLDNSTKLYGKTGAGFTANR |
| OXA-1-like_ATR72263.1 K.p.   | SSLKISPEEQIQFLRKIIINHNLVPVKNSAIEN | TIENMYLQDLDNSTKLYGKTGAGFTANR |
| OXA-1-like_ATR66734.1 K.p.   | SSLKISPEEQIQFLRKIIINHNLVPVKNSAIEN | TIENMYLQDLDNSTKLYGKTGAGFTANR |
| OXA-1-like_ATR61171.1 K.p.   | SSLKISPEEQIQFLRKIIINHNLVPVKNSAIEN | TIENMYLQDLDNSTKLYGKTGAGFTANR |
| OXA-1-like_ATR39902.1 K.p.   | SSLKISPEEQIQFLRKIIINHNLVPVKNSAIEN | TIENMYLQDLDNSTKLYGKTGAGFTANR |
| OXA-1-like_ATR34406.1 K.p.   | SSLKISPEEQIQFLRKIIINHNLVPVKNSAIEN | TIENMYLQDLDNSTKLYGKTGAGFTANR |
| OXA-1-like_ATR28842.1 K.p.   | SSLKISPEEQIQFLRKIIINHNLVPVKNSAIEN | TIENMYLQDLDNSTKLYGKTGAGFTANR |
| OXA-1-like_ATR07462.1 K.p.   | SSLKISPEEQIQFLRKIIINHNLVPVKNSAIEN | TIENMYLQDLDNSTKLYGKTGAGFTANR |
| OXA-1-like_ATQ91613.1 K.p.   | SSLKISPEEQIQFLRKIIINHNLVPVKNSAIEN | TIENMYLQDLDNSTKLYGKTGAGFTANR |
| OXA-1-like_ATQ27236.1 K.p.   | SSLKISPEEQIQFLRKIIINHNLVPVKNSAIEN | TIENMYLQDLDNSTKLYGKTGAGFTANR |
| OXA-1-like_ASC42867.1 K.p.   | SSLKISPEEQIQFLRKIIINHNLVPVKNSAIEN | TIENMYLQDLDNSTKLYGKTGAGFTANR |
| OXA-1-like_QKK74875.1 K.p.   | SSLKISPEEQIQFLRKIIINHNLVPVKNSAIEN | TIENMYLQDLDNSTKLYGKTGAGFTANR |
| OXA-1-like_ATM40508.1 K.p.   | SSLKISPEEQIQFLRKIIINHNLVPVKNSAIEN | TIENMYLQDLDNSTKLYGKTGAGFTANR |
| OXA-1-like_ATM68467.1 K.p.   | SSLKISPEEQIQFLRKIIINHNLVPVKNSAIEN | TIENMYLQDLDNSTKLYGKTGAGFTANR |
| OXA-1-like_ASC37513.1 K.p.   | SSLKISPEEQIQFLRKIIINHNLVPVKNSAIEN | TIENMYLQDLDNSTKLYGKTGAGFTANR |
| OXA-1-like_AQU64164.1 K.p.   | SSLKISPEEQIQFLRKIIINHNLVPVKNSAIEN | TIENMYLQDLDNSTKLYGKTGAGFTANR |
| OXA-1-like_AQU64317.1 K.p.   | SSLKISPEEQIQFLRKIIINHNLVPVKNSAIEN | TIENMYLQDLDNSTKLYGKTGAGFTANR |
| OXA-1-like_APV28290.1 K.p.   | SSLKISPEEQIQFLRKIIINHNLVPVKNSAIEN | TIENMYLQDLDNSTKLYGKTGAGFTANR |
| OXA-1-like_APV22515.1 K.p.   | SSLKISPEEQIQFLRKIIINHNLVPVKNSAIEN | TIENMYLQDLDNSTKLYGKTGAGFTANR |
| OXA-1-like_ANF44129.1 K.p.   | SSLKISPEEQIQFLRKIIINHNLVPVKNSAIEN | TIENMYLQDLDNSTKLYGKTGAGFTANR |
| OXA-1-like_AIG86468.1 K.p.   | SSLKISPEEQIQFLRKIIINHNLVPVKNSAIEN | TIENMYLQDLDNSTKLYGKTGAGFTANR |
| OXA-1-like_AHI38983.1 K.p.   | SSLKISPEEQIQFLRKIIINHNLVPVKNSAIEN | TIENMYLQDLDNSTKLYGKTGAGFTANR |
| OXA-1-like_QCP74266.1 P.a.   | SSLKISPEEQIQFLRKIIINHNLVPVKNSAIEN | TIENMYLQDLDNSTKLYGKTGAGFTANR |
| OXA-1-like_QDE47052.1 E.spp. | SSLKISPEEQIQFLRKIIINHNLVPVKNSAIEN | TIENMYLQDLDNSTKLYGKTGAGFTANR |
| acc                          |                                   |                              |



OXA-1-like subfamily

*OXA-1-like\_BBE55408.1\_K.p.*

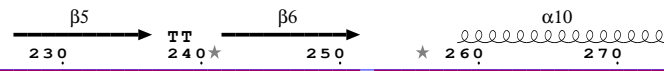

OXA-1-like BBE55408.1\_K.p.  
1M6K\_beta-lactamase OXA-1-like AAV27274.1\_P.a.  
OXA-1-like AEW78522.1\_P.a.  
OXA-1-like QLA55054.1\_P.a.  
OXA-1-like QKG33210.1\_P.a.  
OXA-1-like QCA40829.1\_K.p.  
OXA-1-like QLF61683.1\_K.p.  
OXA-1-like ANP63432.1\_P.a.  
OXA-1-like QIL198525.1\_P.a.  
OXA-1-like AXL178701.1\_P.a.  
OXA-1-like QEL133624.1\_E.spp.  
OXA-1-like QCA24047.1\_E.spp.  
OXA-1-like QC061028.1\_E.spp.  
OXA-1-like ATW95033.1\_E.spp.  
OXA-1-like QBB08468.1\_E.spp.  
OXA-1-like QFH57730.1\_E.spp.  
OXA-1-like QFT25362.1\_E.spp.  
OXA-1-like QHC80210.1\_E.spp.  
OXA-1-like QMT04262.1\_E.spp.  
OXA-1-like QPD73921.1\_E.spp.  
OXA-1-like QP069359.1\_E.spp.  
OXA-1-like QQA69496.1\_E.spp.  
OXA-1-like QO49926.1\_E.spp.  
OXA-1-like APO27937.1\_E.spp.  
OXA-1-like ASOF07832.1\_K.p.  
OXA-1-like APD44928.1\_K.p.  
OXA-1-like AWF45003.1\_K.p.  
OXA-1-like AWW26315.1\_K.p.  
OXA-1-like BB66685.1\_K.p.  
OXA-1-like AR49869.1\_K.p.  
OXA-1-like ART03029.1\_K.p.  
OXA-1-like ART14043.1\_K.p.  
OXA-1-like AT008041.1\_K.p.  
OXA-1-like AQT97012.1\_K.p.  
OXA-1-like AUD20317.1\_K.p.  
OXA-1-like AUD31186.1\_K.p.  
OXA-1-like AUD36737.1\_K.p.  
OXA-1-like AVF14577.1\_K.p.  
OXA-1-like AWC05483.1\_K.p.  
OXA-1-like QAZ99397.1\_K.p.  
OXA-1-like QIF88052.1\_K.p.  
OXA-1-like QLF61156.1\_K.p.  
OXA-1-like QLF66737.1\_K.p.  
OXA-1-like QLG18431.1\_K.p.  
OXA-1-like AIT04829.1\_K.p.  
OXA-1-like AKE87741.1\_K.p.  
OXA-1-like ANK19483.1\_K.p.  
OXA-1-like APO2731.1\_K.p.  
OXA-1-like APB53840.1\_K.p.  
OXA-1-like APM47234.1\_K.p.  
OXA-1-like APM56693.1\_K.p.  
OXA-1-like APM62285.1\_K.p.  
OXA-1-like APM67903.1\_K.p.  
OXA-1-like AP44482.1\_K.p.  
OXA-1-like APQ29072.1\_K.p.  
OXA-1-like APR51020.1\_K.p.  
OXA-1-like ARM26101.1\_K.p.  
OXA-1-like ARM26250.1\_K.p.  
OXA-1-like ART14424.1\_K.p.  
OXA-1-like ARX22868.1\_K.p.  
OXA-1-like ARZ96561.1\_K.p.  
OXA-1-like ASC31826.1\_K.p.  
OXA-1-like QIF55803.1\_K.p.  
OXA-1-like QIF55813.1\_K.p.  
OXA-1-like VAX91792.1\_K.p.  
OXA-1-like VAX91482.1\_K.p.  
OXA-1-like QQL36550.1\_K.p.  
OXA-1-like QPF73193.1\_K.p.  
OXA-1-like QPJ20091.1\_K.p.  
OXA-1-like QPB99042.1\_K.p.  
OXA-1-like QPA13355.1\_K.p.  
OXA-1-like QOU70610.1\_K.p.  
OXA-1-like QOU55181.1\_K.p.  
OXA-1-like QOU39182.1\_K.p.  
OXA-1-like QOT97178.1\_K.p.  
OXA-1-like QOD80635.1\_K.p.  
OXA-1-like QOD80603.1\_K.p.  
OXA-1-like QNB32204.1\_K.p.  
OXA-1-like QMS74616.1\_K.p.  
OXA-1-like QLG67472.1\_K.p.  
OXA-1-like QLT33436.1\_K.p.  
OXA-1-like QLT28063.1\_K.p.  
OXA-1-like QLT22583.1\_K.p.  
OXA-1-like QLT11717.1\_K.p.  
OXA-1-like QLT11731.1\_K.p.  
OXA-1-like QLC16052.1\_K.p.  
OXA-1-like QLC05373.1\_K.p.  
OXA-1-like QLC00088.1\_K.p.  
OXA-1-like QLB94808.1\_K.p.  
OXA-1-like QLB89468.1\_K.p.  
OXA-1-like QLB84130.1\_K.p.  
OXA-1-like QLB78789.1\_K.p.  
OXA-1-like QLB73465.1\_K.p.  
OXA-1-like QIR58461.1\_K.p.  
OXA-1-like QHG08101.1\_K.p.  
OXA-1-like QGZ85920.1\_K.p.  
OXA-1-like QGZ80560.1\_K.p.  
OXA-1-like QGT67290.1\_K.p.  
OXA-1-like QFY31451.1\_K.p.  
OXA-1-like QFH43884.1\_K.p.  
OXA-1-like QER851630.1\_K.p.  
OXA-1-like QEG84620.1\_K.p.

[illegible]

OXA-1-like subfamily

OXA-1-like\_QD235954.1\_K.p.  
 OXA-1-like\_QCX07927.1\_K.p.  
 OXA-1-like\_QBH11436.1\_K.p.  
 OXA-1-like\_QBF99632.1\_K.p.  
 OXA-1-like\_QB88840.1\_K.p.  
 OXA-1-like\_QBA36467.1\_K.p.  
 OXA-1-like\_QZ94541.1\_K.p.  
 OXA-1-like\_BBE58940.1\_K.p.  
 OXA-1-like\_BBE06733.1\_K.p.  
 OXA-1-like\_AZT07357.1\_K.p.  
 OXA-1-like\_AZH52602.1\_K.p.  
 OXA-1-like\_AZG68296.1\_K.p.  
 OXA-1-like\_AZG62714.1\_K.p.  
 OXA-1-like\_AYD37605.1\_K.p.  
 OXA-1-like\_AZ622257.1\_K.p.  
 OXA-1-like\_AZ526762.1\_K.p.  
 OXA-1-like\_AXZ10749.1\_K.p.  
 OXA-1-like\_AWR57732.1\_K.p.  
 OXA-1-like\_AWQ55663.1\_K.p.  
 OXA-1-like\_AWQ55646.1\_K.p.  
 OXA-1-like\_AWQ55645.1\_K.p.  
 OXA-1-like\_AW049662.1\_K.p.  
 OXA-1-like\_AW044383.1\_K.p.  
 OXA-1-like\_AW039120.1\_K.p.  
 OXA-1-like\_AWC00236.1\_K.p.  
 OXA-1-like\_AW71813.1\_K.p.  
 OXA-1-like\_AV080920.1\_K.p.  
 OXA-1-like\_AUX60365.1\_K.p.  
 OXA-1-like\_AU77794.1\_K.p.  
 OXA-1-like\_ATR72263.1\_K.p.  
 OXA-1-like\_ATR66734.1\_K.p.  
 OXA-1-like\_ATR61171.1\_K.p.  
 OXA-1-like\_ATR39902.1\_K.p.  
 OXA-1-like\_ATR34406.1\_K.p.  
 OXA-1-like\_ATR28842.1\_K.p.  
 OXA-1-like\_ATR07462.1\_K.p.  
 OXA-1-like\_AT091613.1\_K.p.  
 OXA-1-like\_AT027236.1\_K.p.  
 OXA-1-like\_ASC42867.1\_K.p.  
 OXA-1-like\_QMK74875.1\_K.p.  
 OXA-1-like\_ATM40508.1\_K.p.  
 OXA-1-like\_ATM68467.1\_K.p.  
 OXA-1-like\_ASC37513.1\_K.p.  
 OXA-1-like\_AQU64141.1\_K.p.  
 OXA-1-like\_AQU64317.1\_K.p.  
 OXA-1-like\_APV28290.1\_K.p.  
 OXA-1-like\_APV22515.1\_K.p.  
 OXA-1-like\_ANF44129.1\_K.p.  
 OXA-1-like\_AIG86468.1\_K.p.  
 OXA-1-like\_AIH38983.1\_K.p.  
 OXA-1-like\_QCP74266.1\_P.a.  
 OXA-1-like\_QDE847052.1\_E.spp.

[illegible]

acc

OXA-2-like subfamily

IK38 1 Beta-lactamase

1K38 1 Beta-lactamase

OXA-2-like VAV79013.1\_E.spp.  
OXA-2-like AXK42030.1\_A.b.  
OXA-2-like APV34059.1\_K.p.  
OXA-2-like ARG68543.1\_P.a.  
OXA-2-like ARK22308.1\_P.a.  
OXA-2-like SZD41030.1\_P.a.  
OXA-2-like ASA15328.1\_P.a.  
OXA-2-like ASA17138.1\_P.a.  
OXA-2-like ASD12027.1\_P.a.  
OXA-2-like AY257805.1\_P.a.  
OXA-2-like QPV55945.1\_P.a.  
OXA-2-like AX874056.1\_P.a.

MSRAPVVRDRRIISVRKSRPACCCPHCCSTRRRSTRVCRAFDPPVCGGVLLRORCVLGLV

acc

## IK38 i Beta-lactamase

1K38 1 Beta-lactamase

OXA-2-like VAV79013.1\_E.spp.  
OXA-2-like AXX42030.1\_A.b.  
OXA-2-like APV34059.1\_K.p.  
OXA-2-like ARG65543.1\_P.a.  
OXA-2-like AVK22308.1\_P.a.  
OXA-2-like SZD41030.1\_P.a.  
OXA-2-like ASA15328.1\_P.a.  
OXA-2-like ASA17138.1\_P.a.  
OXA-2-like ASD12027.1\_P.a.  
OXA-2-like AY257805.1\_P.a.  
OXA-2-like QPV55945.1\_P.a.  
OXA-2-like ASX874056.1\_P.a.

CAKCAASGRRCSSGKSRRALGSWSRMHRIRLRHSTYOORKHLGAPGGWIHGGCSSTLLP

acc

## IK38 i Beta-lactamase

1K38 1 Beta-lactamase

OXA-2-like VAV79013.1\_E.spp.  
OXA-2-like AXK4030.1\_A.b.  
OXA-2-like APV34059.1\_K.p.  
OXA-2-like ARG65543.1\_P.a.  
OXA-2-like AVK22308.1\_P.a.  
OXA-2-like SZD41030.1\_P.a.  
OXA-2-like ASA15328.1\_P.a.  
OXA-2-like ASA17138.1\_P.a.  
OXA-2-like ASD12027.1\_P.a.  
OXA-2-like AY257805.1\_P.a.  
OXA-2-like QPV55945.1\_P.a.  
OXA-2-like ASX74056.1\_P.a.

[illegible]

acc

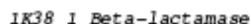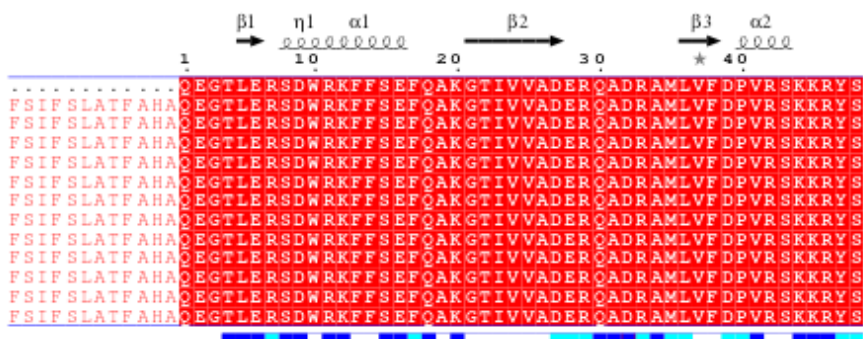

acc

## 1K38 1 Beta-lactamase

1K38 1 Beta-lactamase

OXA-2-like VAV79013.1\_E.spp.  
 OXA-2-like ASX42030.1\_A.b.  
 OXA-2-like APV34059.1\_K.p.  
 OXA-2-like ARG86543.1\_P.a.  
 OXA-2-like ARV22308.1\_P.a.  
 OXA-2-like SZD41030.1\_P.a.  
 OXA-2-like ASA15328.1\_P.a.  
 OXA-2-like ASAI7138.1\_P.a.  
 OXA-2-like ASD12027.1\_P.a.  
 OXA-2-like AY257805.1\_P.a.  
 OXA-2-like QPV55945.1\_P.a.  
 OXA-2-like ASX74056.1\_P.a.

[illegible]

ACC



# OXA-2-like subfamily

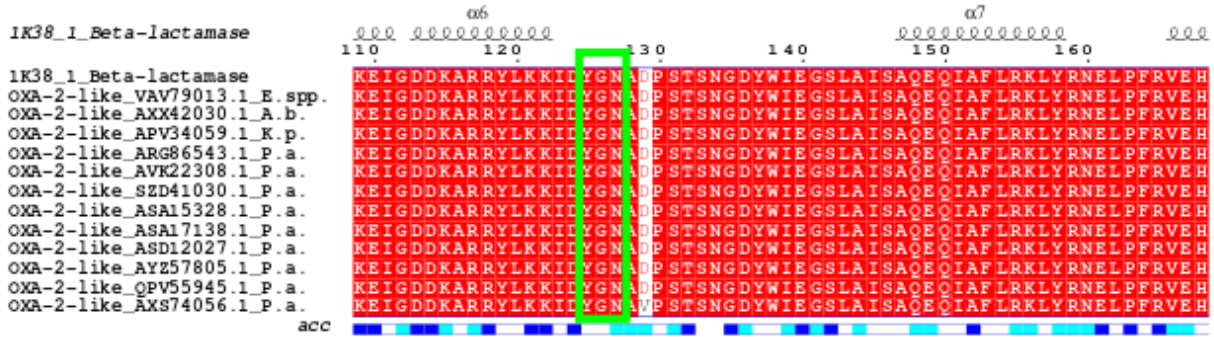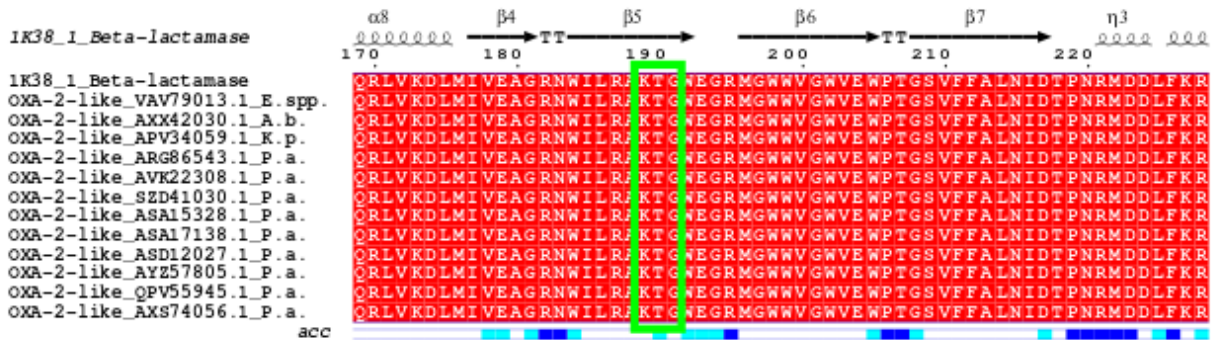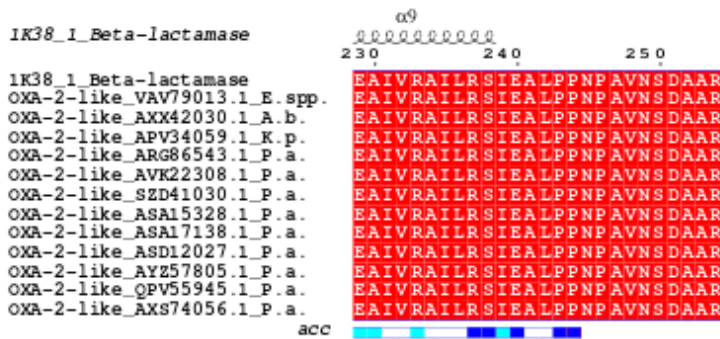

# OXA-5-like subfamily

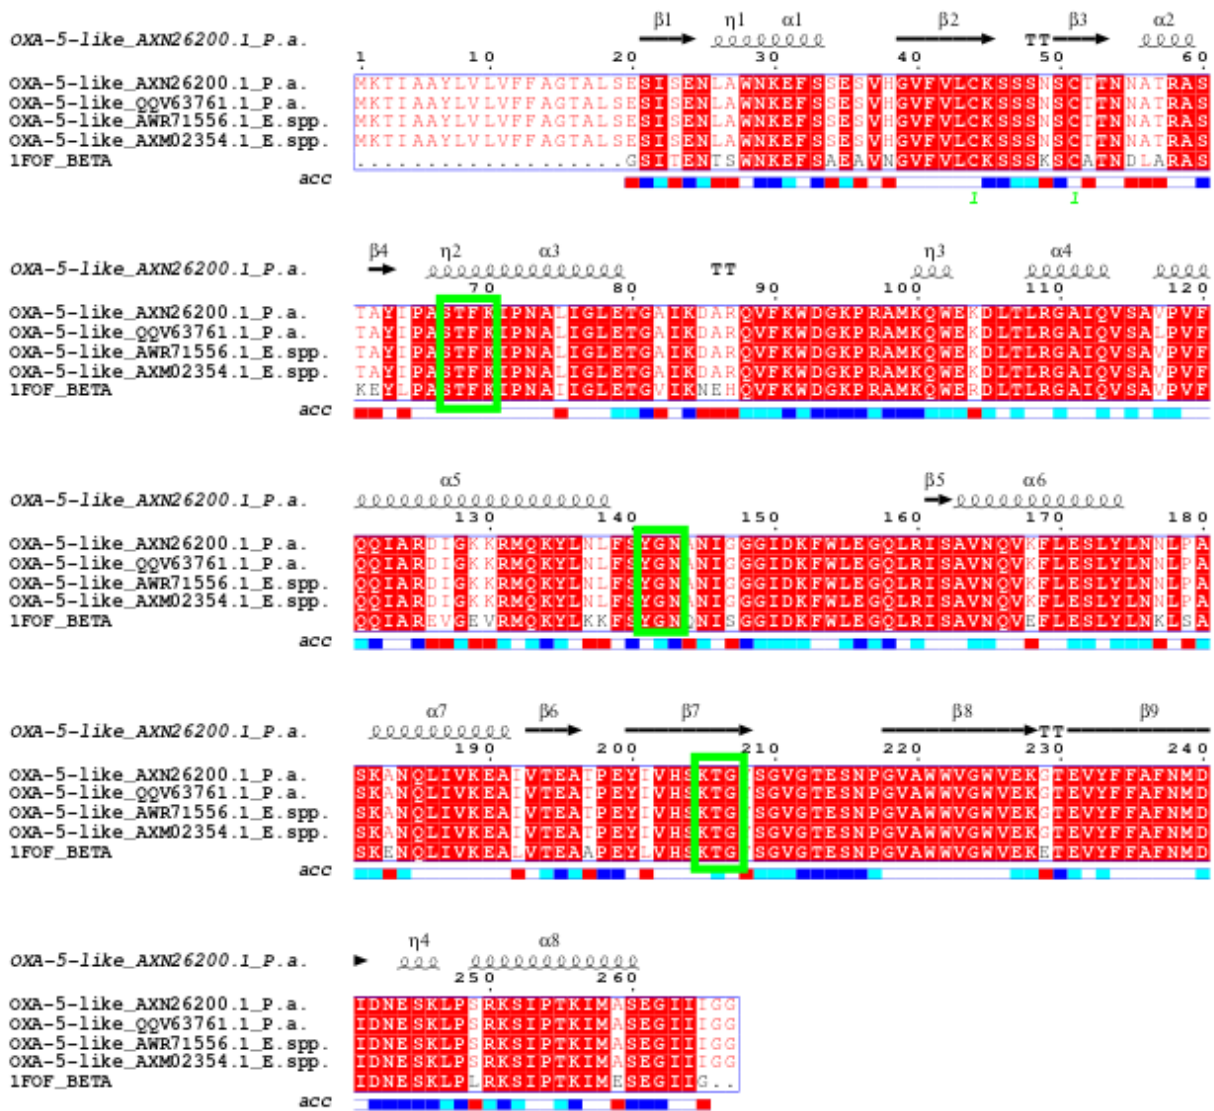

# OXA-9-like subfamily

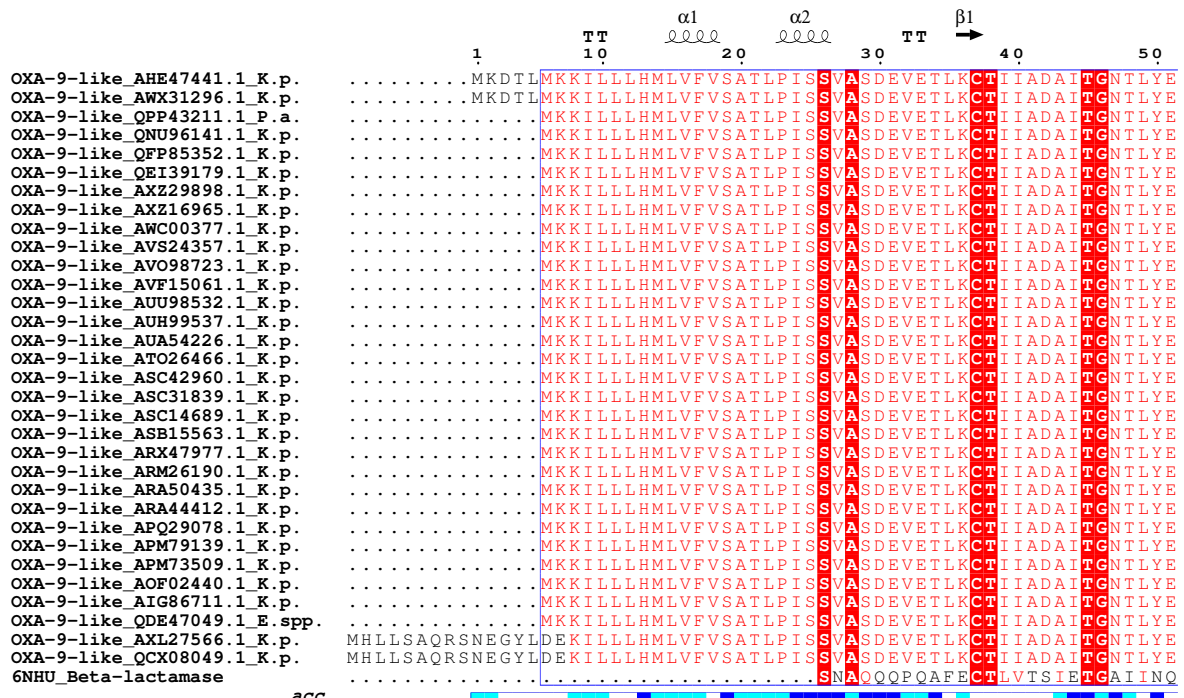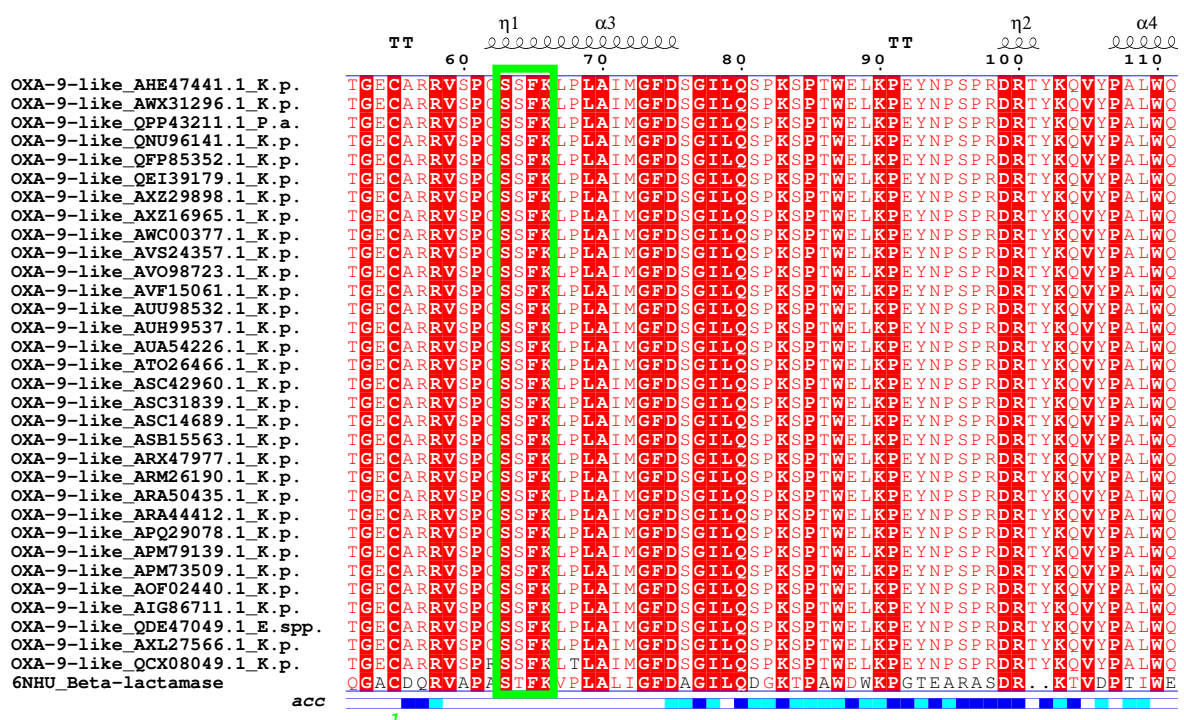



# OXA-9-like subfamily

|                              | α5       | α6                     | α7  |             |
|------------------------------|----------|------------------------|-----|-------------|
|                              | 120      | 130                    | 140 | 150 160 170 |
| OXA-9-like_AHE47441.1 K.p.   | SDSVVWF  | SQQLTSRLGVDRFTBYVKKFF  | YGN | DVSGDS      |
| OXA-9-like_AWX31296.1 K.p.   | SDSVVWF  | SQQLTSRLGVDRFTBYVKKFF  | YGN | DVSGDS      |
| OXA-9-like_QPP43211.1 P.a.   | SDSVVWF  | SQQLTSRLGVDRFTBYVKKFF  | YGN | DVSGDS      |
| OXA-9-like_QNU96141.1 K.p.   | SDSVVWF  | SQQLTSRLGVDRFTBYVKKFF  | YGN | DVSGDS      |
| OXA-9-like_QFP85352.1 K.p.   | SDSVVWF  | SQQLTSRLGVDRFTBYVKKFF  | YGN | DVSGDS      |
| OXA-9-like_QBI39179.1 K.p.   | SDSVVWF  | SQQLTSRLGVDRFTBYVKKFF  | YGN | DVSGDS      |
| OXA-9-like_AXZ29898.1 K.p.   | SDSVVWF  | SQQLTSRLGVDRFTBYVKKFF  | YGN | DVSGDS      |
| OXA-9-like_AXZ16965.1 K.p.   | SDSVVWF  | SQQLTSRLGVDRFTBYVKKFF  | YGN | DVSGDS      |
| OXA-9-like_AWC00377.1 K.p.   | SDSVVWF  | SQQLTSRLGVDRFTBYVKKFF  | YGN | DVSGDS      |
| OXA-9-like_AVS24357.1 K.p.   | SDSVVWF  | SQQLTSRLGVDRFTBYVKKFF  | YGN | DVSGDS      |
| OXA-9-like_AVO98723.1 K.p.   | SDSVVWF  | SQQLTSRLGVDRFTBYVKKFF  | YGN | DVSGDS      |
| OXA-9-like_AVF15061.1 K.p.   | SDSVVWF  | SQQLTSRLGVDRFTBYVKKFF  | YGN | DVSGDS      |
| OXA-9-like_AUU98532.1 K.p.   | SDSVVWF  | SQQLTSRLGVDRFTBYVKKFF  | YGN | DVSGDS      |
| OXA-9-like_AUH99537.1 K.p.   | SDSVVWF  | SQQLTSRLGVDRFTBYVKKFF  | YGN | DVSGDS      |
| OXA-9-like_AUA54226.1 K.p.   | SDSVVWF  | SQQLTSRLGVDRFTBYVKKFF  | YGN | DVSGDS      |
| OXA-9-like_ATO26466.1 K.p.   | SDSVVWF  | SQQLTSRLGVDRFTBYVKKFF  | YGN | DVSGDS      |
| OXA-9-like_ASC42960.1 K.p.   | SDSVVWF  | SQQLTSRLGVDRFTBYVKKFF  | YGN | DVSGDS      |
| OXA-9-like_ASC31839.1 K.p.   | SDSVVWF  | SQQLTSRLGVDRFTBYVKKFF  | YGN | DVSGDS      |
| OXA-9-like_ASC14689.1 K.p.   | SDSVVWF  | SQQLTSRLGVDRFTBYVKKFF  | YGN | DVSGDS      |
| OXA-9-like_ASB15563.1 K.p.   | SDSVVWF  | SQQLTSRLGVDRFTBYVKKFF  | YGN | DVSGDS      |
| OXA-9-like_ARX47977.1 K.p.   | SDSVVWF  | SQQLTSRLGVDRFTBYVKKFF  | YGN | DVSGDS      |
| OXA-9-like_ARM26190.1 K.p.   | SDSVVWF  | SQQLTSRLGVDRFTBYVKKFF  | YGN | DVSGDS      |
| OXA-9-like_ARA50435.1 K.p.   | SDSVVWF  | SQQLTSRLGVDRFTBYVKKFF  | YGN | DVSGDS      |
| OXA-9-like_ARA44412.1 K.p.   | SDSVVWF  | SQQLTSRLGVDRFTBYVKKFF  | YGN | DVSGDS      |
| OXA-9-like_QDE47049.1 E.spp. | SDSVVWF  | SQQLTSRLGVDRFTBYVKKFF  | YGN | DVSGDS      |
| OXA-9-like_AXL27566.1 K.p.   | SDSVVWF  | SQQLTSRLGVDRFTBYVKKFF  | YGN | DVSGDS      |
| OXA-9-like_QCX08049.1 K.p.   | SDSVVWF  | SQQLTSRLGVDRFTBYVKKFF  | YGN | DVSGDS      |
| 6NHU_Beta-lactamase          | QDSVLEWY | SREITRLRGPEKFAAYVKKRLC | YGN | DVSGEP      |
| acc                          |          |                        |     |             |

|                              | α8      | α9    | β2      | β3     | TT                          | β4      |
|------------------------------|---------|-------|---------|--------|-----------------------------|---------|
|                              | 180     | 190   | 200     | 210    | 220                         | 230     |
| OXA-9-like_AHE47441.1 K.p.   | IQFLRFV | VAHKL | LPVSEAA | YDMAY  | ATIPQYQAAEGWAVHGXSGSGWLRDNN | GKINESR |
| OXA-9-like_AWX31296.1 K.p.   | IQFLRFV | VAHKL | LPVSEAA | YDMAY  | ATIPQYQAAEGWAVHGXSGSGWLRDNN | GKINESR |
| OXA-9-like_QPP43211.1 P.a.   | IQFLRFV | VAHKL | LPVSEAA | YDMAY  | ATIPQYQAAEGWAVHGXSGSGWLRDNN | GKINESR |
| OXA-9-like_QNU96141.1 K.p.   | IQFLRFV | VAHKL | LPVSEAA | YDMAY  | ATIPQYQAAEGWAVHGXSGSGWLRDNN | GKINESR |
| OXA-9-like_QFP85352.1 K.p.   | IQFLRFV | VAHKL | LPVSEAA | YDMAY  | ATIPQYQAAEGWAVHGXSGSGWLRDNN | GKINESR |
| OXA-9-like_QBI39179.1 K.p.   | IQFLRFV | VAHKL | LPVSEAA | YDMAY  | ATIPQYQAAEGWAVHGXSGSGWLRDNN | GKINESR |
| OXA-9-like_AXZ29898.1 K.p.   | IQFLRFV | VAHKL | LPVSEAA | YDMAY  | ATIPQYQAAEGWAVHGXSGSGWLRDNN | GKINESR |
| OXA-9-like_AXZ16965.1 K.p.   | IQFLRFV | VAHKL | LPVSEAA | YDMAY  | ATIPQYQAAEGWAVHGXSGSGWLRDNN | GKINESR |
| OXA-9-like_AWC00377.1 K.p.   | IQFLRFV | VAHKL | LPVSEAA | YDMAY  | ATIPQYQAAEGWAVHGXSGSGWLRDNN | GKINESR |
| OXA-9-like_AVS24357.1 K.p.   | IQFLRFV | VAHKL | LPVSEAA | YDMAY  | ATIPQYQAAEGWAVHGXSGSGWLRDNN | GKINESR |
| OXA-9-like_AVO98723.1 K.p.   | IQFLRFV | VAHKL | LPVSEAA | YDMAY  | ATIPQYQAAEGWAVHGXSGSGWLRDNN | GKINESR |
| OXA-9-like_AVF15061.1 K.p.   | IQFLRFV | VAHKL | LPVSEAA | YDMAY  | ATIPQYQAAEGWAVHGXSGSGWLRDNN | GKINESR |
| OXA-9-like_AUU98532.1 K.p.   | IQFLRFV | VAHKL | LPVSEAA | YDMAY  | ATIPQYQAAEGWAVHGXSGSGWLRDNN | GKINESR |
| OXA-9-like_AUH99537.1 K.p.   | IQFLRFV | VAHKL | LPVSEAA | YDMAY  | ATIPQYQAAEGWAVHGXSGSGWLRDNN | GKINESR |
| OXA-9-like_AUA54226.1 K.p.   | IQFLRFV | VAHKL | LPVSEAA | YDMAY  | ATIPQYQAAEGWAVHGXSGSGWLRDNN | GKINESR |
| OXA-9-like_ATO26466.1 K.p.   | IQFLRFV | VAHKL | LPVSEAA | YDMAY  | ATIPQYQAAEGWAVHGXSGSGWLRDNN | GKINESR |
| OXA-9-like_ASC42960.1 K.p.   | IQFLRFV | VAHKL | LPVSEAA | YDMAY  | ATIPQYQAAEGWAVHGXSGSGWLRDNN | GKINESR |
| OXA-9-like_ASC31839.1 K.p.   | IQFLRFV | VAHKL | LPVSEAA | YDMAY  | ATIPQYQAAEGWAVHGXSGSGWLRDNN | GKINESR |
| OXA-9-like_ASC14689.1 K.p.   | IQFLRFV | VAHKL | LPVSEAA | YDMAY  | ATIPQYQAAEGWAVHGXSGSGWLRDNN | GKINESR |
| OXA-9-like_ASB15563.1 K.p.   | IQFLRFV | VAHKL | LPVSEAA | YDMAY  | ATIPQYQAAEGWAVHGXSGSGWLRDNN | GKINESR |
| OXA-9-like_ARX47977.1 K.p.   | IQFLRFV | VAHKL | LPVSEAA | YDMAY  | ATIPQYQAAEGWAVHGXSGSGWLRDNN | GKINESR |
| OXA-9-like_ARM26190.1 K.p.   | IQFLRFV | VAHKL | LPVSEAA | YDMAY  | ATIPQYQAAEGWAVHGXSGSGWLRDNN | GKINESR |
| OXA-9-like_ARA50435.1 K.p.   | IQFLRFV | VAHKL | LPVSEAA | YDMAY  | ATIPQYQAAEGWAVHGXSGSGWLRDNN | GKINESR |
| OXA-9-like_ARA44412.1 K.p.   | IQFLRFV | VAHKL | LPVSEAA | YDMAY  | ATIPQYQAAEGWAVHGXSGSGWLRDNN | GKINESR |
| OXA-9-like_APQ29078.1 K.p.   | IQFLRFV | VAHKL | LPVSEAA | YDMAY  | ATIPQYQAAEGWAVHGXSGSGWLRDNN | GKINESR |
| OXA-9-like_APM79139.1 K.p.   | IQFLRFV | VAHKL | LPVSEAA | YDMAY  | ATIPQYQAAEGWAVHGXSGSGWLRDNN | GKINESR |
| OXA-9-like_APM73509.1 K.p.   | IQFLRFV | VAHKL | LPVSEAA | YDMAY  | ATIPQYQAAEGWAVHGXSGSGWLRDNN | GKINESR |
| OXA-9-like_AOF02440.1 K.p.   | IQFLRFV | VAHKL | LPVSEAA | YDMAY  | ATIPQYQAAEGWAVHGXSGSGWLRDNN | GKINESR |
| OXA-9-like_AIG86711.1 K.p.   | IQFLRFV | VAHKL | LPVSEAA | YDMAY  | ATIPQYQAAEGWAVHGXSGSGWLRDNN | GKINESR |
| OXA-9-like_QDE47049.1 E.spp. | IQFLRFV | VAHKL | LPVSEAA | YDMAY  | ATIPQYQAAEGWAVHGXSGSGWLRDNN | GKINESR |
| OXA-9-like_AXL27566.1 K.p.   | IQFLRFV | VAHKL | LPVSEAA | YDMAY  | ATIPQYQAAEGWAVHGXSGSGWLRDNN | GKINESR |
| OXA-9-like_QCX08049.1 K.p.   | IQFLRFV | VAHKL | LPVSEAA | YDMAY  | ATIPQYQAAEGWAVHGXSGSGWLRDNN | GKINESR |
| 6NHU_Beta-lactamase          | VGFLRL  | LLGGN | LPESRD  | AQAKTR | AIMPVFDAPESWAVHGXSGSGWLRDNN | GKINESR |
| acc                          |         |       |         |        |                             |         |

# OXA-9-like subfamily

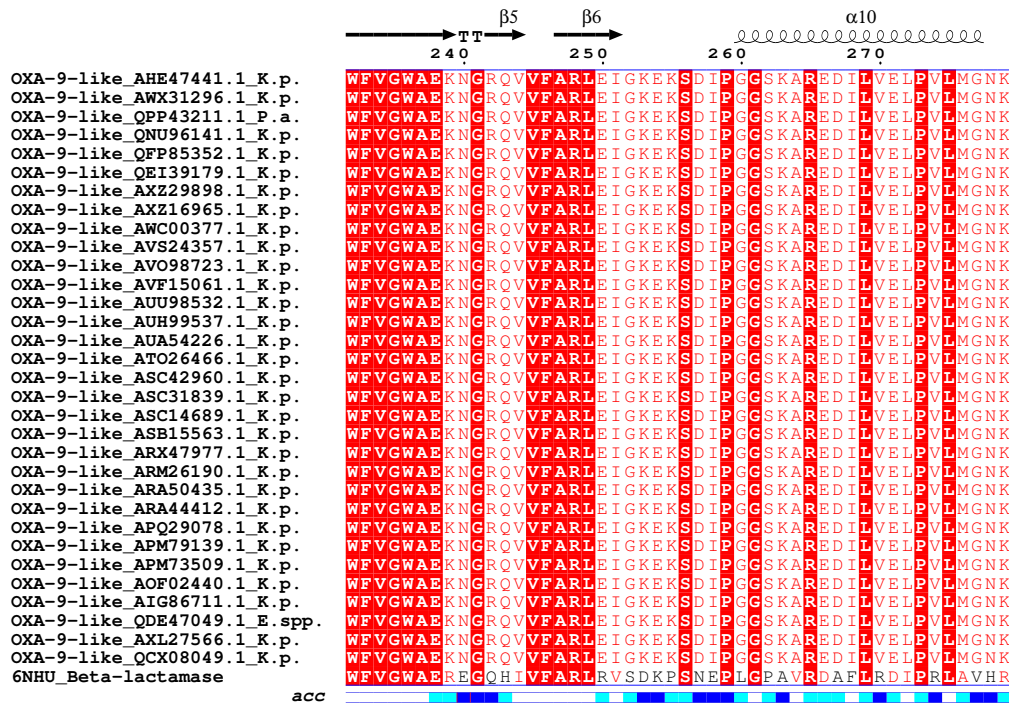

# OXA-10-like subfamily

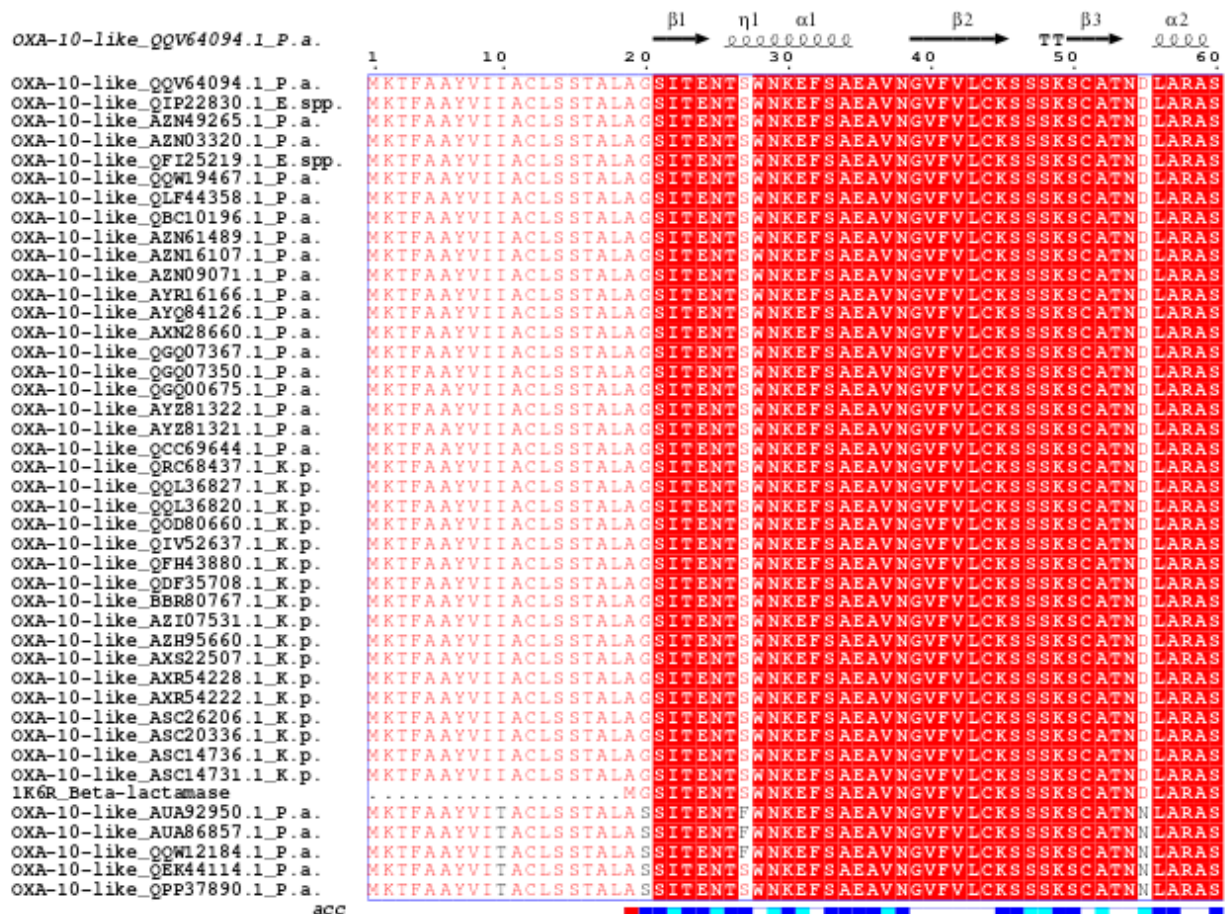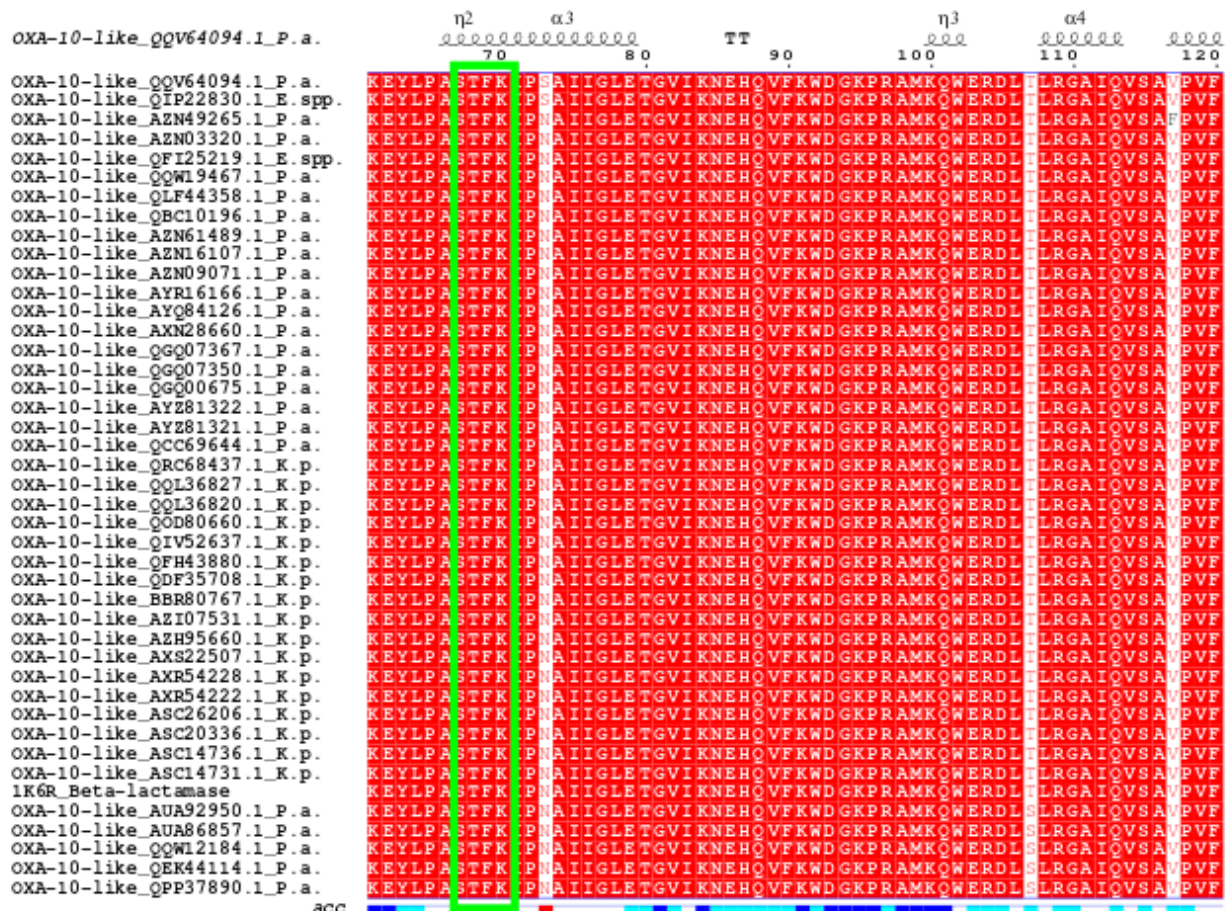



# OXA-10-like subfamily

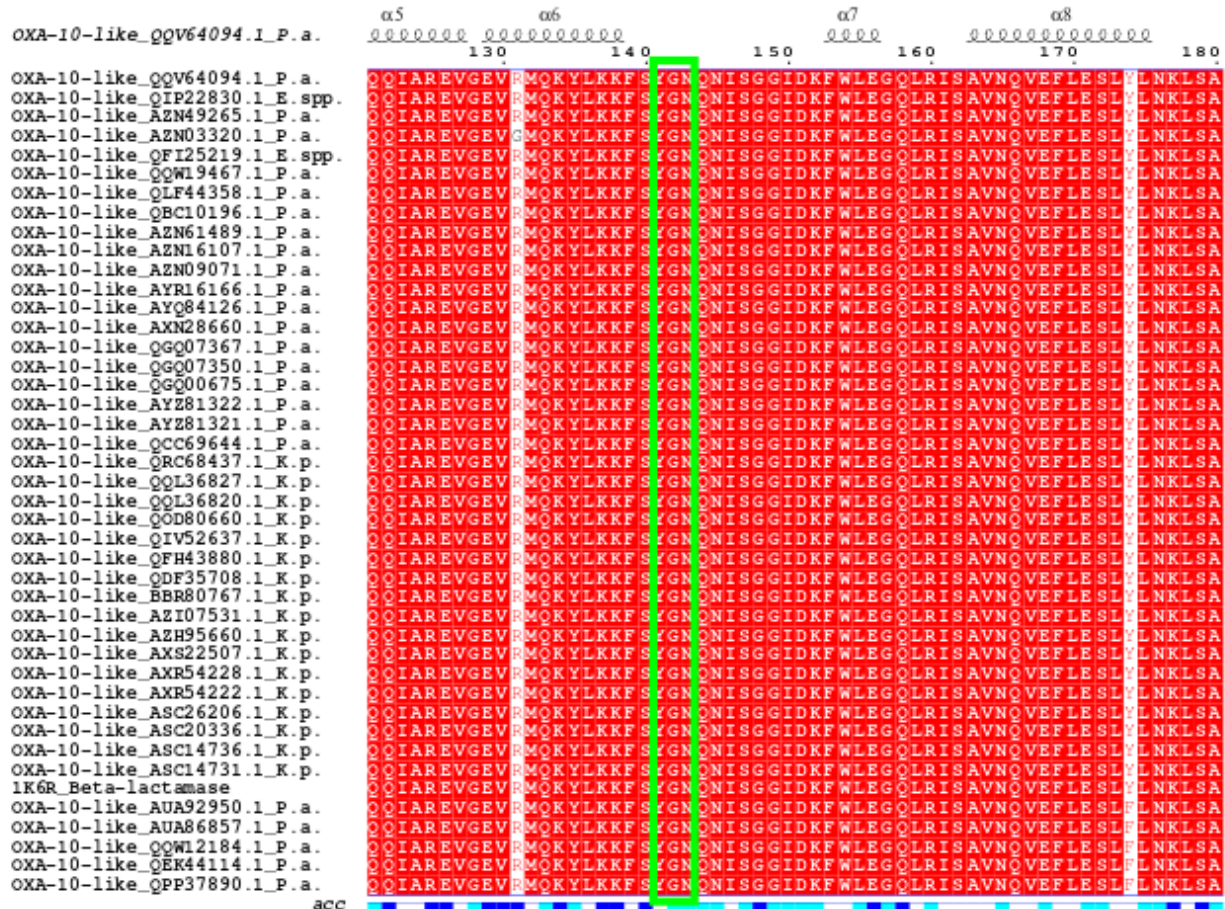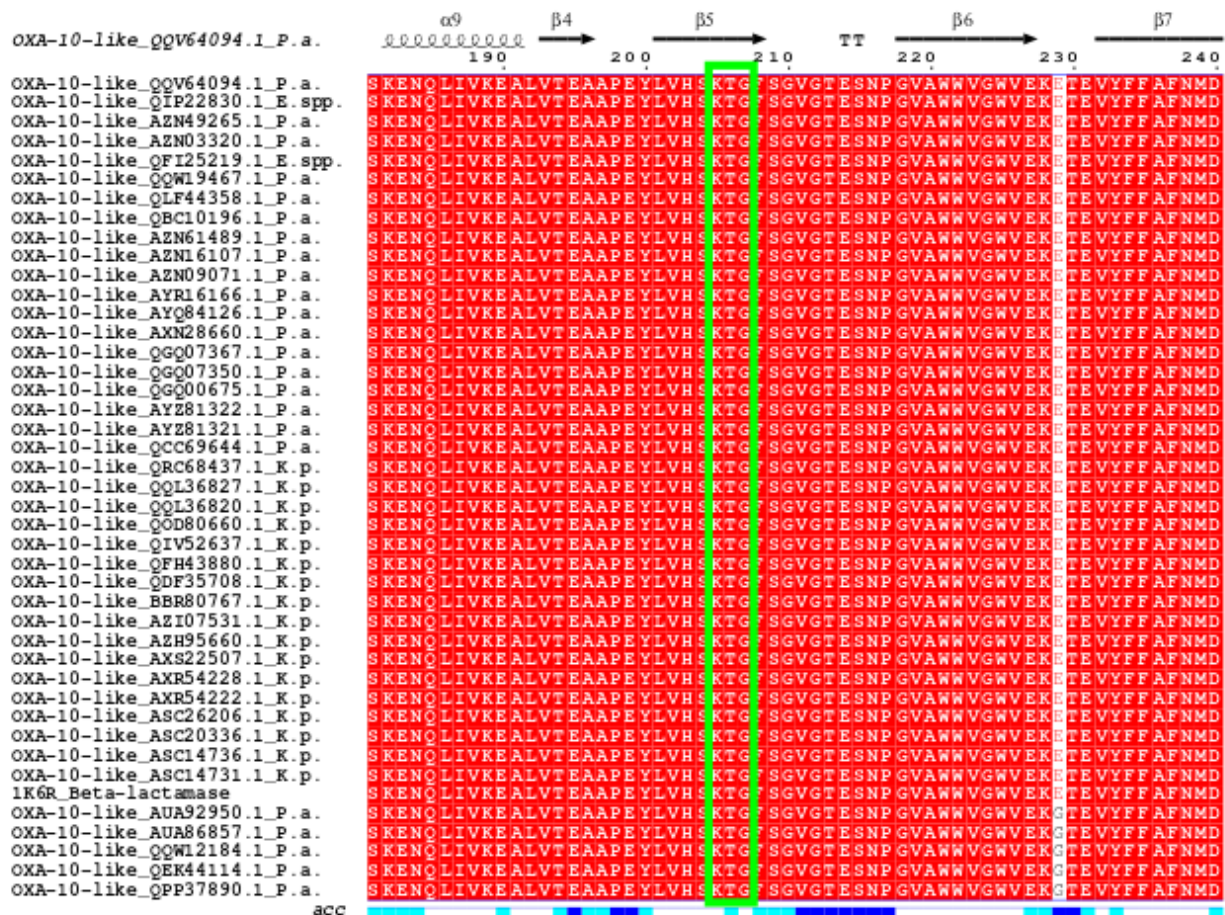

OXA-10-like subfamily

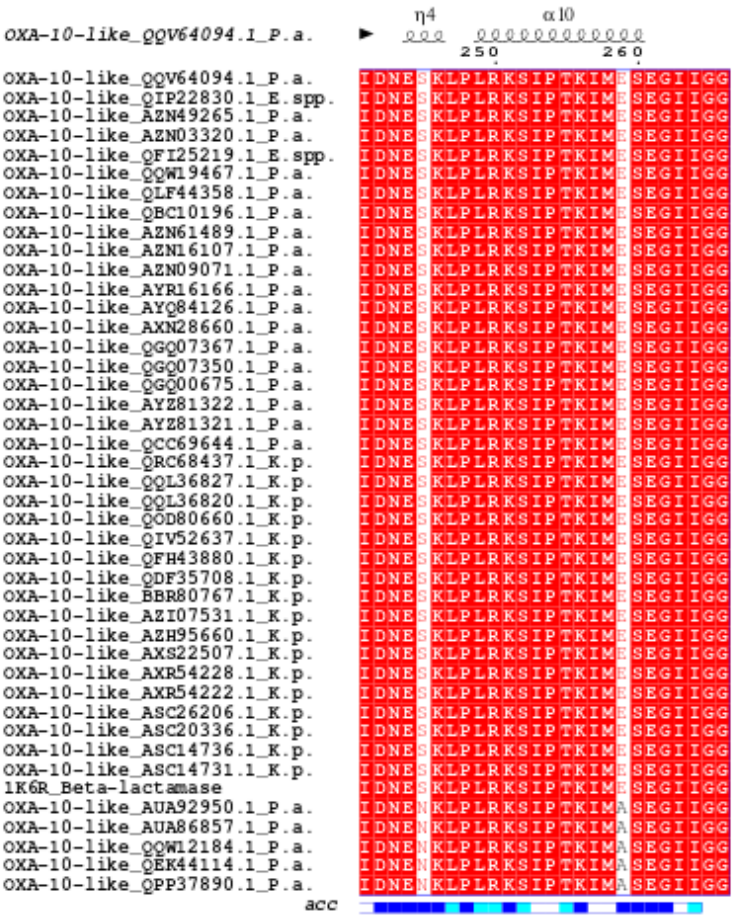

# OXA-20-like subfamily

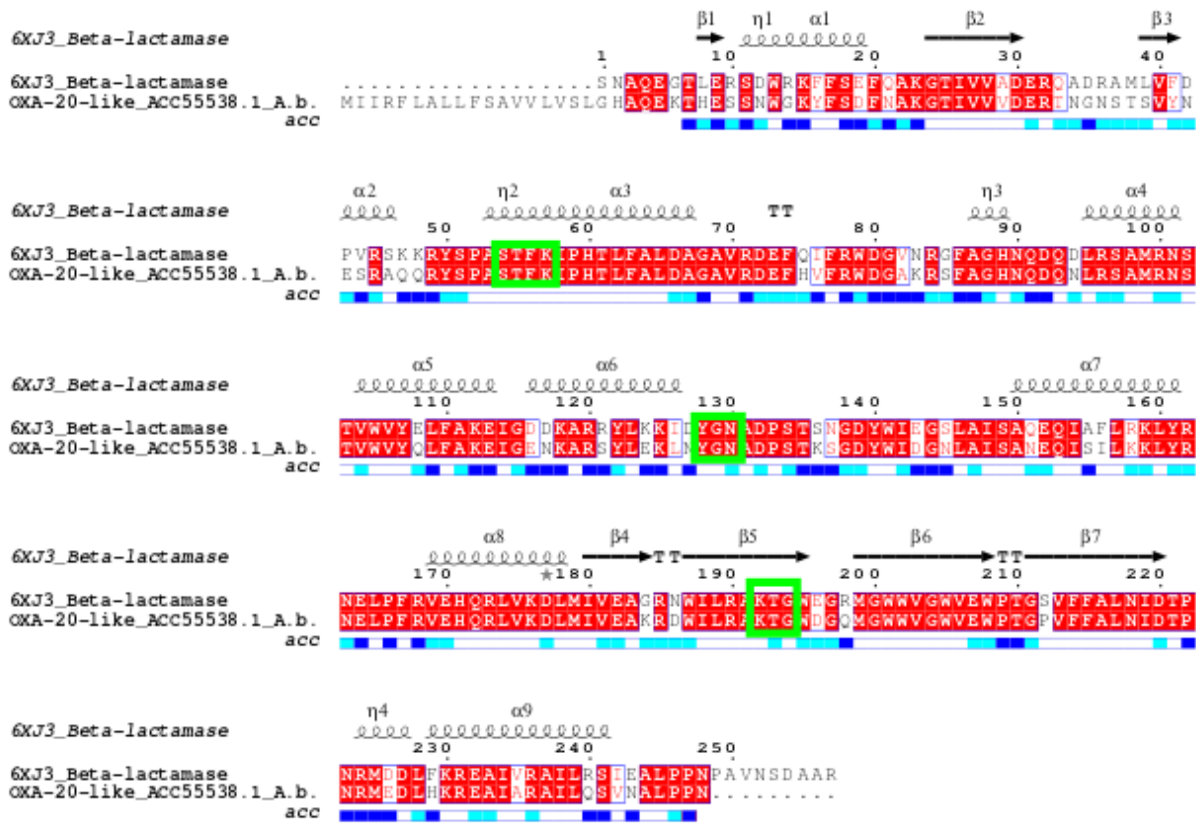



OXA-23-like subfamily

*OXA-23-like\_QQE03160.1\_A.b.*

OXA-23-like\_QQE03160.1 A. b.  
 OXA-23-like\_QQE03411.1 A. b.  
 OXA-23-like\_QQD99609.1 A. b.  
 OXA-23-like\_QQD99362.1 A. b.  
 OXA-23-like\_QQD95815.1 A. b.  
 OXA-23-like\_QQD95566.1 A. b.  
 OXA-23-like\_QQD93073.1 A. b.  
 OXA-23-like\_QQD92824.1 A. b.  
 OXA-23-like\_QQB67579.1 A. b.  
 OXA-23-like\_QQB65684.1 A. b.  
 OXA-23-like\_QP003745.1 A. b.  
 OXA-23-like\_QP000239.1 A. b.  
 OXA-23-like\_QLG80230.1 A. b.  
 OXA-23-like\_QLA71954.1 A. b.  
 OXA-23-like\_QJP32450.1 A. b.  
 OXA-23-like\_QJH23301.1 A. b.  
 OXA-23-like\_QJH19267.1 A. b.  
 OXA-23-like\_QJH16482.1 A. b.  
 OXA-23-like\_QJH15745.1 A. b.  
 OXA-23-like\_QJH15717.1 A. b.  
 OXA-23-like\_QJH08361.1 A. b.  
 OXA-23-like\_QJH12331.1 A. b.  
 OXA-23-like\_QJH05456.1 A. b.  
 OXA-23-like\_QJH00715.1 A. b.  
 OXA-23-like\_QJG95773.1 A. b.  
 OXA-23-like\_QJG96932.1 A. b.  
 OXA-23-like\_QJG96957.1 A. b.  
 OXA-23-like\_QJH00689.1 A. b.  
 OXA-23-like\_AOX88011.1 A. b.  
 OXA-23-like\_AOX91849.1 A. b.  
 OXA-23-like\_AOX95708.1 A. b.  
 OXA-23-like\_APM50633.1 A. b.  
 OXA-23-like\_APM50651.1 A. b.  
 OXA-23-like\_AQU56756.1 A. b.  
 OXA-23-like\_AQU56788.1 A. b.  
 OXA-23-like\_ARF92486.1 A. b.  
 OXA-23-like\_ARF92497.1 A. b.  
 OXA-23-like\_ARF95290.1 A. b.  
 OXA-23-like\_ARF96125.1 A. b.  
 OXA-23-like\_ARG05487.1 A. b.  
 OXA-23-like\_ARG10150.1 A. b.  
 OXA-23-like\_ARG12999.1 A. b.  
 OXA-23-like\_ARG19192.1 A. b.  
 OXA-23-like\_ARG19219.1 A. b.  
 OXA-23-like\_ARG28873.1 A. b.  
 OXA-23-like\_ARG28898.1 A. b.  
 OXA-23-like\_ARG30155.1 A. b.  
 OXA-23-like\_ARG35250.1 A. b.  
 OXA-23-like\_ASF49900.1 A. b.  
 OXA-23-like\_AUG13479.1 A. b.  
 OXA-23-like\_AVN25815.1 A. b.  
 OXA-23-like\_AVN25876.1 A. b.  
 OXA-23-like\_AVN25910.1 A. b.  
 OXA-23-like\_AWW79127.1 A. b.  
 OXA-23-like\_AWW83877.1 A. b.  
 OXA-23-like\_AWW86703.1 A. b.  
 OXA-23-like\_AYY88859.1 A. b.  
 OXA-23-like\_BAP68327.1 A. b.  
 OXA-23-like\_QAS95332.1 A. b.  
 OXA-23-like\_QAT02983.1 A. b.  
 OXA-23-like\_QBY15339.1 A. b.  
 OXA-23-like\_QCH32733.1 A. b.  
 OXA-23-like\_QCP17255.1 A. b.  
 OXA-23-like\_QCP24705.1 A. b.  
 OXA-23-like\_QCP27215.1 A. b.  
 OXA-23-like\_QCP29558.1 A. b.  
 OXA-23-like\_QCP40778.1 A. b.  
 OXA-23-like\_QCP43779.1 A. b.  
 OXA-23-like\_QCP44095.1 A. b.  
 OXA-23-like\_QCP47140.1 A. b.  
 OXA-23-like\_QCR88532.1 A. b.  
 OXA-23-like\_QDR92294.1 A. b.  
 OXA-23-like\_QDR95367.1 A. b.  
 OXA-23-like\_QEE57736.1 A. b.  
 OXA-23-like\_QEE57740.1 A. b.  
 OXA-23-like\_QEE57744.1 A. b.  
 OXA-23-like\_QEY29291.1 A. b.  
 OXA-23-like\_QEY29320.1 A. b.  
 OXA-23-like\_QEY29496.1 A. b.  
 OXA-23-like\_QIX29121.1 A. b.  
 OXA-23-like\_QIX32951.1 A. b.  
 OXA-23-like\_QIX36912.1 A. b.  
 OXA-23-like\_QIX40711.1 A. b.  
 OXA-23-like\_QIX44509.1 A. b.  
 OXA-23-like\_QJG69304.1 A. b.  
 OXA-23-like\_QJG70467.1 A. b.  
 OXA-23-like\_QJG70485.1 A. b.  
 OXA-23-like\_QJG71265.1 A. b.  
 OXA-23-like\_QJG74213.1 A. b.  
 OXA-23-like\_QJG81833.1 A. b.  
 OXA-23-like\_QJG84680.1 A. b.  
 OXA-23-like\_QJG89564.1 A. b.  
 OXA-23-like\_QJG89584.1 A. b.  
 OXA-23-like\_QJG90447.1 A. b.  
 OXA-23-like\_QJG93290.1 A. b.  
 OXA-23-like\_ADX93021.1 A. b.  
 OXA-23-like\_AXG83856.1 A. b.  
 OXA-23-like\_AML68547.1 A. b.  
 OXA-23-like\_ARG03241.1 A. b.  
 OXA-23-like\_AOX84133.1 A. b.  
 OXA-23-like\_AOX82595.1 A. b.  
 OXA-23-like\_AOX75920.1 A. b.  
 OXA-23-like\_AOX75888.1 A. b.

[illegible]

# OXA-20-like subfamily

|                             |                     |                                |                                                                                       |
|-----------------------------|---------------------|--------------------------------|---------------------------------------------------------------------------------------|
| OXA-23-like_AOX72443.1 A.b. | .....               | MNKYFTCYVVASLFLSGCTVQHNLINETPS | QIVQGHNQVIH                                                                           |
| OXA-23-like_AOX68171.1 A.b. | .....               | MNKYFTCYVVASLFLSGCTVQHNLINETPS | QIVQGHNQVIH                                                                           |
| OXA-23-like_AMC14310.1 A.b. | .....               | MNKYFTCYVVASLFLSGCTVQHNLINETPS | QIVQGHNQVIH                                                                           |
| OXA-23-like_AMC14301.1 A.b. | .....               | MNKYFTCYVVASLFLSGCTVQHNLINETPS | QIVQGHNQVIH                                                                           |
| OXA-23-like_ALY00722.1 A.b. | .....               | MNKYFTCYVVASLFLSGCTVQHNLINETPS | QIVQGHNQVIH                                                                           |
| OXA-23-like_ALX98871.1 A.b. | .....               | MNKYFTCYVVASLFLSGCTVQHNLINETPS | QIVQGHNQVIH                                                                           |
| OXA-23-like_AKA30333.1 A.b. | .....               | MNKYFTCYVVASLFLSGCTVQHNLINETPS | QIVQGHNQVIH                                                                           |
| OXA-23-like_AGQ10499.1 A.b. | .....               | MNKYFTCYVVASLFLSGCTVQHNLINETPS | QIVQGHNQVIH                                                                           |
| OXA-23-like_AGQ05635.1 A.b. | .....               | MNKYFTCYVVASLFLSGCTVQHNLINETPS | QIVQGHNQVIH                                                                           |
| OXA-23-like_ACJ39972.1 A.b. | .....               | MNKYFTCYVVASLFLSGCTVQHNLINETPS | QIVQGHNQVIH                                                                           |
| OXA-23-like_QKK76748.1 A.b. | .....               | MNKYFTCYVVASLFLSGCTVQHNLINETPS | QIVQGHNQVIH                                                                           |
| OXA-23-like_QKK76707.1 A.b. | .....               | MNKYFTCYVVASLFLSGCTVQHNLINETPS | QIVQGHNQVIH                                                                           |
| OXA-23-like_QKK76393.1 A.b. | .....               | MNKYFTCYVVASLFLSGCTVQHNLINETPS | QIVQGHNQVIH                                                                           |
| OXA-23-like_QFX72557.1 A.b. | .....               | MNKYFTCYVVASLFLSGCTVQHNLINETPS | QIVQGHNQVIH                                                                           |
| OXA-23-like_QFZ56693.1 A.b. | .....               | MNKYFTCYVVASLFLSGCTVQHNLINETPS | QIVQGHNQVIH                                                                           |
| OXA-23-like_AYC00513.1 A.b. | .....               | MNKYFTCYVVASLFLSGCTVQHNLINETPS | QIVQGHNQVIH                                                                           |
| OXA-23-like_AYC00505.1 A.b. | .....               | MNKYFTCYVVASLFLSGCTVQHNLINETPS | QIVQGHNQVIH                                                                           |
| OXA-23-like_ARG39357.1 A.b. | .....               | MNKYFTCYVVASLFLSGCTVQHNLINETPS | QIVQGHNQVIH                                                                           |
| OXA-23-like_ARG23739.1 A.b. | .....               | MNKYFTCYVVASLFLSGCTVQHNLINETPS | QIVQGHNQVIH                                                                           |
| OXA-23-like_ARG23713.1 A.b. | .....               | MNKYFTCYVVASLFLSGCTVQHNLINETPS | QIVQGHNQVIH                                                                           |
| OXA-23-like_ARG03186.1 A.b. | .....               | MNKYFTCYVVASLFLSGCTVQHNLINETPS | QIVQGHNQVIH                                                                           |
| OXA-23-like_AEP06450.2 A.b. | .....               | MNKYFTCYVVASLFLSGCTVQHNLINETPS | QIVQGHNQVIH                                                                           |
| OXA-23-like_AML75286.1 A.b. | .....               | MNKYFTCYVVASLFLSGCTVQHNLINETPS | QIVQGHNQVIH                                                                           |
| OXA-23-like_AML75277.1 A.b. | .....               | MNKYFTCYVVASLFLSGCTVQHNLINETPS | QIVQGHNQVIH                                                                           |
| OXA-23-like_AML71526.1 A.b. | .....               | MNKYFTCYVVASLFLSGCTVQHNLINETPS | QIVQGHNQVIH                                                                           |
| OXA-23-like_AML69469.1 A.b. | .....               | MNKYFTCYVVASLFLSGCTVQHNLINETPS | QIVQGHNQVIH                                                                           |
| OXA-23-like_AML6436.1 A.b.  | .....               | MNKYFTCYVVASLFLSGCTVQHNLINETPS | QIVQGHNQVIH                                                                           |
| OXA-23-like_AML65160.1 A.b. | .....               | MNKYFTCYVVASLFLSGCTVQHNLINETPS | QIVQGHNQVIH                                                                           |
| OXA-23-like_AML65128.1 A.b. | .....               | MNKYFTCYVVASLFLSGCTVQHNLINETPS | QIVQGHNQVIH                                                                           |
| OXA-23-like_AMN00602.1 A.b. | .....               | MNKYFTCYVVASLFLSGCTVQHNLINETPS | QIVQGHNQVIH                                                                           |
| OXA-23-like_AMN00587.1 A.b. | .....               | MNKYFTCYVVASLFLSGCTVQHNLINETPS | QIVQGHNQVIH                                                                           |
| OXA-23-like_AMN00578.1 A.b. | .....               | MNKYFTCYVVASLFLSGCTVQHNLINETPS | QIVQGHNQVIH                                                                           |
| OXA-23-like_AMN00569.1 A.b. | .....               | MNKYFTCYVVASLFLSGCTVQHNLINETPS | QIVQGHNQVIH                                                                           |
| OXA-23-like_QJF37605.1 A.b. | .....               | MNKYFTCYVVASLFLSGCTVQHNLINETPS | QIVQGHNQVIH                                                                           |
| OXA-23-like_QJF33717.1 A.b. | .....               | MNKYFTCYVVASLFLSGCTVQHNLINETPS | QIVQGHNQVIH                                                                           |
| OXA-23-like_QJH05102.1 A.b. | .....               | MNKYFTCYVVASLFLSGCTVQHNLINETPS | QIVQGHNQVIH                                                                           |
| OXA-23-like_QJH23846.1 A.b. | .....               | MNKYFTCYVVASLFLSGCTVQHNLINETPS | QIVQGHNQVIH                                                                           |
| OXA-23-like_QCH35083.1 A.b. | .....               | MNKYFTCYVVASLFLSGCTVQHNLINETPS | QIVQGHNQVIH                                                                           |
| OXA-23-like_QAT07029.1 A.b. | .....               | MNKYFTCYVVASLFLSGCTVQHNLINETPS | QIVQGHNQVIH                                                                           |
| OXA-23-like_QAS99734.1 A.b. | .....               | MNKYFTCYVVASLFLSGCTVQHNLINETPS | QIVQGHNQVIH                                                                           |
| OXA-23-like_AVE56824.1 A.b. | .....               | MNKYFTCYVVASLFLSGCTVQHNLINETPS | QIVQGHNQVIH                                                                           |
| OXA-23-like_AVE44374.1 A.b. | .....               | MNKYFTCYVVASLFLSGCTVQHNLINETPS | QIVQGHNQVIH                                                                           |
| OXA-23-like_ATR89604.1 A.b. | .....               | MNKYFTCYVVASLFLSGCTVQHNLINETPS | QIVQGHNQVIH                                                                           |
| OXA-23-like_ARG29802.1 A.b. | .....               | MNKYFTCYVVASLFLSGCTVQHNLINETPS | QIVQGHNQVIH                                                                           |
| OXA-23-like_APF45746.1 A.b. | .....               | MNKYFTCYVVASLFLSGCTVQHNLINETPS | QIVQGHNQVIH                                                                           |
| OXA-23-like_APQ95067.1 A.b. | .....               | MNKYFTCYVVASLFLSGCTVQHNLINETPS | QIVQGHNQVIH                                                                           |
| OXA-23-like_APQ87413.1 A.b. | .....               | MNKYFTCYVVASLFLSGCTVQHNLINETPS | QIVQGHNQVIH                                                                           |
| OXA-23-like_ATR88802.1 A.b. | MSYLFLSCTE.....     | ..KYFTCYVVASLFLSGCTVQHNLINETPS | QIVQGHNQVIH                                                                           |
| OXA-23-like_ATR88943.1 A.b. | MSYLFLSCTE.....     | ..KYFTCYVVASLFLSGCTVQHNLINETPS | QIVQGHNQVIH                                                                           |
| OXA-23-like_SBS23848.1 A.b. | MSYLFLSCTELFSIDLVPK | MNKYFTCYVVASLFLSGCTVQHNLINETPS | QIVQGHNQVIH                                                                           |
| OXA-23-like_AOP62462.1 A.b. | MSYLFLSCTELFSIDLVPK | MNKYFTCYVVASLFLSGCTVQHNLINETPS | QIVQGHNQVIH                                                                           |
| 4JF4_Beta-lactamase         | .....               | .....                          | .....                                                                                 |
| OXA-23-like_QCP18237.1 A.b. | .....               | .....MWLFFF..LFGCTVQHNLINETPS  | QIVQGHNQVIH                                                                           |
| OXA-23-like_QRN19109.1 A.b. | .....               | .....MWLFFF..LFGCTVQHNLINETPS  | QIVQGHNQVIH                                                                           |
| acc                         |                     |                                |  |

OXA-23-like QQE03160.1 1 A. b.  
OXA-23-like QQE03411.1 1 A. b.  
OXA-23-like QQP99609.1 1 A. b.  
OXA-23-like QQP99362.1 1 A. b.  
OXA-23-like QQP95815.1 1 A. b.  
OXA-23-like QQP95566.1 1 A. b.  
OXA-23-like QQP93073.1 1 A. b.  
OXA-23-like QQP92824.1 1 A. b.  
OXA-23-like QQB67579.1 1 A. b.  
OXA-23-like QQB65684.1 1 A. b.  
OXA-23-like QP003745.1 1 A. b.  
OXA-23-like QP000239.1 1 A. b.  
OXA-23-like QLG80230.1 1 A. b.  
OXA-23-like QLA71954.1 1 A. b.  
OXA-23-like QJP32450.1 1 A. b.  
OXA-23-like QJH23301.1 1 A. b.  
OXA-23-like QJH19267.1 1 A. b.  
OXA-23-like QJH16482.1 1 A. b.  
OXA-23-like QJH15745.1 1 A. b.  
OXA-23-like QJH15717.1 1 A. b.  
OXA-23-like QJH08361.1 1 A. b.  
OXA-23-like QJH12331.1 1 A. b.  
OXA-23-like QJH05456.1 1 A. b.  
OXA-23-like QJH007115.1 1 A. b.  
OXA-23-like QJG95773.1 1 A. b.  
OXA-23-like QJG96932.1 1 A. b.  
OXA-23-like QJG96957.1 1 A. b.  
OXA-23-like QJH00689.1 1 A. b.  
OXA-23-like AOX88011.1 1 A. b.  
OXA-23-like AOX91849.1 1 A. b.  
OXA-23-like AOX95708.1 1 A. b.  
OXA-23-like APM50633.1 1 A. b.  
OXA-23-like APM50651.1 1 A. b.  
OXA-23-like AQU56756.1 1 A. b.  
OXA-23-like AQU56788.1 1 A. b.  
OXA-23-like ARF92486.1 1 A. b.  
OXA-23-like ARF92497.1 1 A. b.  
OXA-23-like ARF95290.1 1 A. b.  
OXA-23-like ARF96125.1 1 A. b.  
OXA-23-like ARG05487.1 1 A. b.  
OXA-23-like ARG10150.1 1 A. b.  
OXA-23-like ARG12999.1 1 A. b.  
OXA-23-like ARG19192.1 1 A. b.  
OXA-23-like ARG19219.1 1 A. b.  
OXA-23-like ARG28873.1 1 A. b.  
OXA-23-like ARG28898.1 1 A. b.  
OXA-23-like ARG30155.1 1 A. b.  
OXA-23-like ARG35250.1 1 A. b.  
OXA-23-like ASF49900.1 1 A. b.  
OXA-23-like AUG13479.1 1 A. b.  
OXA-23-like AVN25815.1 1 A. b.  
OXA-23-like AVN25876.1 1 A. b.  
OXA-23-like AVN25910.1 1 A. b.  
OXA-23-like AWW79127.1 1 A. b.  
OXA-23-like AWW83877.1 1 A. b.  
OXA-23-like AWW86703.1 1 A. b.  
OXA-23-like AY888859.1 1 A. b.  
OXA-23-like BAP68327.1 1 A. b.  
OXA-23-like QAS95332.1 1 A. b.  
OXA-23-like QAT02983.1 1 A. b.  
OXA-23-like QBY15339.1 1 A. b.  
OXA-23-like QCH32733.1 1 A. b.  
OXA-23-like QCP17255.1 1 A. b.  
OXA-23-like QCP24705.1 1 A. b.  
OXA-23-like QCP27215.1 1 A. b.  
OXA-23-like QCP29558.1 1 A. b.  
OXA-23-like QCP40778.1 1 A. b.  
OXA-23-like QCP43779.1 1 A. b.  
OXA-23-like QCP44095.1 1 A. b.  
OXA-23-like QCP47140.1 1 A. b.  
OXA-23-like QCR88532.1 1 A. b.  
OXA-23-like QDR92294.1 1 A. b.  
OXA-23-like QDR95367.1 1 A. b.  
OXA-23-like QEE57736.1 1 A. b.  
OXA-23-like QEE57740.1 1 A. b.  
OXA-23-like QEE57744.1 1 A. b.  
OXA-23-like QEY29291.1 1 A. b.  
OXA-23-like QEY29320.1 1 A. b.  
OXA-23-like QEY29496.1 1 A. b.  
OXA-23-like QIX29121.1 1 A. b.  
OXA-23-like QIX32951.1 1 A. b.  
OXA-23-like QIX36912.1 1 A. b.  
OXA-23-like QIX40711.1 1 A. b.  
OXA-23-like QIX44509.1 1 A. b.  
OXA-23-like QJG69304.1 1 A. b.  
OXA-23-like QJG70467.1 1 A. b.  
OXA-23-like QJG70485.1 1 A. b.  
OXA-23-like QJG71265.1 1 A. b.  
OXA-23-like QJG74213.1 1 A. b.  
OXA-23-like QJG81833.1 1 A. b.  
OXA-23-like QJG84680.1 1 A. b.  
OXA-23-like QJG89564.1 1 A. b.  
OXA-23-like QJG89584.1 1 A. b.  
OXA-23-like QJG90447.1 1 A. b.  
OXA-23-like QJG93290.1 1 A. b.  
OXA-23-like ADX93021.1 1 A. b.  
OXA-23-like AXG83856.1 1 A. b.  
OXA-23-like AML68547.1 1 A. b.  
OXA-23-like ARG03241.1 1 A. b.  
OXA-23-like AOX84133.1 1 A. b.  
OXA-23-like AOX84295.1 1 A. b.  
OXA-23-like AOX75920.1 1 A. b.  
OXA-23-like AOX75888.1 1 A. b.

[illegible]



# OXA-23-like subfamily

|                        |      |                              |           |      |              |        |
|------------------------|------|------------------------------|-----------|------|--------------|--------|
| OXA-23-like_AOX72443.1 | A.b. | QYFDEKNTSGVLVIQTDKKINLYGNALS | RANTEYVPA | STFK | LNALIGLENOKT | DINEIF |
| OXA-23-like_AOX68171.1 | A.b. | QYFDEKNTSGVLVIQTDKKINLYGNALS | RANTEYVPA | STFK | LNALIGLENOKT | DINEIF |
| OXA-23-like_AMC14310.1 | A.b. | QYFDEKNTSGVLVIQTDKKINLYGNALS | RANTEYVPA | STFK | LNALIGLENOKT | DINEIF |
| OXA-23-like_AMC14301.1 | A.b. | QYFDEKNTSGVLVIQTDKKINLYGNALS | RANTEYVPA | STFK | LNALIGLENOKT | DINEIF |
| OXA-23-like_ALY00722.1 | A.b. | QYFDEKNTSGVLVIQTDKKINLYGNALS | RANTEYVPA | STFK | LNALIGLENOKT | DINEIF |
| OXA-23-like_ALX98871.1 | A.b. | QYFDEKNTSGVLVIQTDKKINLYGNALS | RANTEYVPA | STFK | LNALIGLENOKT | DINEIF |
| OXA-23-like_AKA30333.1 | A.b. | QYFDEKNTSGVLVIQTDKKINLYGNALS | RANTEYVPA | STFK | LNALIGLENOKT | DINEIF |
| OXA-23-like_AGQ10499.1 | A.b. | QYFDEKNTSGVLVIQTDKKINLYGNALS | RANTEYVPA | STFK | LNALIGLENOKT | DINEIF |
| OXA-23-like_AGQ05635.1 | A.b. | QYFDEKNTSGVLVIQTDKKINLYGNALS | RANTEYVPA | STFK | LNALIGLENOKT | DINEIF |
| OXA-23-like_ACJ39972.1 | A.b. | QYFDEKNTSGVLVIQTDKKINLYGNALS | RANTEYVPA | STFK | LNALIGLENOKT | DINEIF |
| OXA-23-like_QKK06748.1 | A.b. | QYFDEKNTSGVLVIQTDKKINLYGNALS | RANTEYVPA | STFK | LNALIGLENOKT | DINEIF |
| OXA-23-like_QKK76707.1 | A.b. | QYFDEKNTSGVLVIQTDKKINLYGNALS | RANTEYVPA | STFK | LNALIGLENOKT | DINEIF |
| OXA-23-like_QKK76393.1 | A.b. | QYFDEKNTSGVLVIQTDKKINLYGNALS | RANTEYVPA | STFK | LNALIGLENOKT | DINEIF |
| OXA-23-like_QFX72557.1 | A.b. | QYFDEKNTSGVLVIQTDKKINLYGNALS | RANTEYVPA | STFK | LNALIGLENOKT | DINEIF |
| OXA-23-like_QFZ56693.1 | A.b. | QYFDEKNTSGVLVIQTDKKINLYGNALS | RANTEYVPA | STFK | LNALIGLENOKT | DINEIF |
| OXA-23-like_AYC00513.1 | A.b. | QYFDEKNTSGVLVIQTDKKINLYGNALS | RANTEYVPA | STFK | LNALIGLENOKT | DINEIF |
| OXA-23-like_AYC00505.1 | A.b. | QYFDEKNTSGVLVIQTDKKINLYGNALS | RANTEYVPA | STFK | LNALIGLENOKT | DINEIF |
| OXA-23-like_ARG39357.1 | A.b. | QYFDEKNTSGVLVIQTDKKINLYGNALS | RANTEYVPA | STFK | LNALIGLENOKT | DINEIF |
| OXA-23-like_ARG23739.1 | A.b. | QYFDEKNTSGVLVIQTDKKINLYGNALS | RANTEYVPA | STFK | LNALIGLENOKT | DINEIF |
| OXA-23-like_ARG23713.1 | A.b. | QYFDEKNTSGVLVIQTDKKINLYGNALS | RANTEYVPA | STFK | LNALIGLENOKT | DINEIF |
| OXA-23-like_ARG03186.1 | A.b. | QYFDEKNTSGVLVIQTDKKINLYGNALS | RANTEYVPA | STFK | LNALIGLENOKT | DINEIF |
| OXA-23-like_AEP06450.2 | A.b. | QYFDEKNTSGVLVIQTDKKINLYGNALS | RANTEYVPA | STFK | LNALIGLENOKT | DINEIF |
| OXA-23-like_AML75286.1 | A.b. | QYFDEKNTSGVLVIQTDKKINLYGNALS | RANTEYVPA | STFK | LNALIGLENOKT | DINEIF |
| OXA-23-like_AML75277.1 | A.b. | QYFDEKNTSGVLVIQTDKKINLYGNALS | RANTEYVPA | STFK | LNALIGLENOKT | DINEIF |
| OXA-23-like_AML71526.1 | A.b. | QYFDEKNTSGVLVIQTDKKINLYGNALS | RANTEYVPA | STFK | LNALIGLENOKT | DINEIF |
| OXA-23-like_AML69469.1 | A.b. | QYFDEKNTSGVLVIQTDKKINLYGNALS | RANTEYVPA | STFK | LNALIGLENOKT | DINEIF |
| OXA-23-like_AML66436.1 | A.b. | QYFDEKNTSGVLVIQTDKKINLYGNALS | RANTEYVPA | STFK | LNALIGLENOKT | DINEIF |
| OXA-23-like_AML65160.1 | A.b. | QYFDEKNTSGVLVIQTDKKINLYGNALS | RANTEYVPA | STFK | LNALIGLENOKT | DINEIF |
| OXA-23-like_AML65128.1 | A.b. | QYFDEKNTSGVLVIQTDKKINLYGNALS | RANTEYVPA | STFK | LNALIGLENOKT | DINEIF |
| OXA-23-like_AML60602.1 | A.b. | QYFDEKNTSGVLVIQTDKKINLYGNALS | RANTEYVPA | STFK | LNALIGLENOKT | DINEIF |
| OXA-23-like_AMN00587.1 | A.b. | QYFDEKNTSGVLVIQTDKKINLYGNALS | RANTEYVPA | STFK | LNALIGLENOKT | DINEIF |
| OXA-23-like_AMN00578.1 | A.b. | QYFDEKNTSGVLVIQTDKKINLYGNALS | RANTEYVPA | STFK | LNALIGLENOKT | DINEIF |
| OXA-23-like_AMN00569.1 | A.b. | QYFDEKNTSGVLVIQTDKKINLYGNALS | RANTEYVPA | STFK | LNALIGLENOKT | DINEIF |
| OXA-23-like_QJF37605.1 | A.b. | QYFDEKNTSGVLVIQTDKKINLYGNALS | RANTEYVPA | STFK | LNALIGLENOKT | DINEIF |
| OXA-23-like_QJF33717.1 | A.b. | QYFDEKNTSGVLVIQTDKKINLYGNALS | RANTEYVPA | STFK | LNALIGLENOKT | DINEIF |
| OXA-23-like_QJH05102.1 | A.b. | QYFDEKNTSGVLVIQTDKKINLYGNALS | RANTEYVPA | STFK | LNALIGLENOKT | DINEIF |
| OXA-23-like_QJH23846.1 | A.b. | QYFDEKNTSGVLVIQTDKKINLYGNALS | RANTEYVPA | STFK | LNALIGLENOKT | DINEIF |
| OXA-23-like_QCH35083.1 | A.b. | QYFDEKNTSGVLVIQTDKKINLYGNALS | RANTEYVPA | STFK | LNALIGLENOKT | DINEIF |
| OXA-23-like_QAT07029.1 | A.b. | QYFDEKNTSGVLVIQTDKKINLYGNALS | RANTEYVPA | STFK | LNALIGLENOKT | DINEIF |
| OXA-23-like_QAS99734.1 | A.b. | QYFDEKNTSGVLVIQTDKKINLYGNALS | RANTEYVPA | STFK | LNALIGLENOKT | DINEIF |
| OXA-23-like_AVE56824.1 | A.b. | QYFDEKNTSGVLVIQTDKKINLYGNALS | RANTEYVPA | STFK | LNALIGLENOKT | DINEIF |
| OXA-23-like_AVE44374.1 | A.b. | QYFDEKNTSGVLVIQTDKKINLYGNALS | RANTEYVPA | STFK | LNALIGLENOKT | DINEIF |
| OXA-23-like_ATR89604.1 | A.b. | QYFDEKNTSGVLVIQTDKKINLYGNALS | RANTEYVPA | STFK | LNALIGLENOKT | DINEIF |
| OXA-23-like_ARG29802.1 | A.b. | QYFDEKNTSGVLVIQTDKKINLYGNALS | RANTEYVPA | STFK | LNALIGLENOKT | DINEIF |
| OXA-23-like_APF45746.1 | A.b. | QYFDEKNTSGVLVIQTDKKINLYGNALS | RANTEYVPA | STFK | LNALIGLENOKT | DINEIF |
| OXA-23-like_APQ95067.1 | A.b. | QYFDEKNTSGVLVIQTDKKINLYGNALS | RANTEYVPA | STFK | LNALIGLENOKT | DINEIF |
| OXA-23-like_APQ87413.1 | A.b. | QYFDEKNTSGVLVIQTDKKINLYGNALS | RANTEYVPA | STFK | LNALIGLENOKT | DINEIF |
| OXA-23-like_ATR88802.1 | A.b. | QYFDEKNTSGVLVIQTDKKINLYGNALS | RANTEYVPA | STFK | LNALIGLENOKT | DINEIF |
| OXA-23-like_ATR88943.1 | A.b. | QYFDEKNTSGVLVIQTDKKINLYGNALS | RANTEYVPA | STFK | LNALIGLENOKT | DINEIF |
| OXA-23-like_SBS23848.1 | A.b. | QYFDEKNTSGVLVIQTDKKINLYGNALS | RANTEYVPA | STFK | LNALIGLENOKT | DINEIF |
| OXA-23-like_AOP62462.1 | A.b. | QYFDEKNTSGVLVIQTDKKINLYGNALS | RANTEYVPA | STFK | LNALIGLENOKT | DINEIF |
| 4JF4_Beta-lactamase    |      | QYFDEKNTSGVLVIQTDKKINLYGNALS | RANTEYVPA | STFK | LNALIGLENOKT | DINEIF |
| OXA-23-like_QCP18237.1 | A.b. | QYFDEKNTSGVLVIQTDKKINLYGNALS | RANTEYVPA | STFK | LNALIGLENOKT | DINEIF |
| OXA-23-like_QRN19109.1 | A.b. | QYFDEKNTSGVLVIQTDKKINLYGNALS | RANTEYVPA | STFK | LNALIGLENOKT | DINEIF |
| acc                    |      |                              |           |      |              |        |

OXA-23-like subfamily

| OXA-23-like_QQE03160_1.A.B. | η3       |                 | α3  |     | α4  |     | α5  |     |
|-----------------------------|----------|-----------------|-----|-----|-----|-----|-----|-----|
|                             | 110      | 120             | 130 | 140 | 150 | 160 | 170 | 180 |
| OXA-23-like_QQE03160_1.A.B. | KWKGEKRS | FTAWEKDMTLGEAMK | S   | V   | P   | V   | Y   | Q   |
| OXA-23-like_QQE03411_1.A.B. | KWKGEKRS | FTAWEKDMTLGEAMK | S   | V   | P   | V   | Y   | Q   |
| OXA-23-like_QQP96609_1.A.B. | KWKGEKRS | FTAWEKDMTLGEAMK | S   | V   | P   | V   | Y   | Q   |
| OXA-23-like_QQP99362_1.A.B. | KWKGEKRS | FTAWEKDMTLGEAMK | S   | V   | P   | V   | Y   | Q   |
| OXA-23-like_QQP95815_1.A.B. | KWKGEKRS | FTAWEKDMTLGEAMK | S   | V   | P   | V   | Y   | Q   |
| OXA-23-like_QQP95566_1.A.B. | KWKGEKRS | FTAWEKDMTLGEAMK | S   | V   | P   | V   | Y   | Q   |
| OXA-23-like_QQP93073_1.A.B. | KWKGEKRS | FTAWEKDMTLGEAMK | S   | V   | P   | V   | Y   | Q   |
| OXA-23-like_QQP92824_1.A.B. | KWKGEKRS | FTAWEKDMTLGEAMK | S   | V   | P   | V   | Y   | Q   |
| OXA-23-like_QQB67579_1.A.B. | KWKGEKRS | FTAWEKDMTLGEAMK | S   | V   | P   | V   | Y   | Q   |
| OXA-23-like_QQB65684_1.A.B. | KWKGEKRS | FTAWEKDMTLGEAMK | S   | V   | P   | V   | Y   | Q   |
| OXA-23-like_QP003745_1.A.B. | KWKGEKRS | FTAWEKDMTLGEAMK | S   | V   | P   | V   | Y   | Q   |
| OXA-23-like_QP000239_1.A.B. | KWKGEKRS | FTAWEKDMTLGEAMK | S   | V   | P   | V   | Y   | Q   |
| OXA-23-like_QLG80230_1.A.B. | KWKGEKRS | FTAWEKDMTLGEAMK | S   | V   | P   | V   | Y   | Q   |
| OXA-23-like_QLA71954_1.A.B. | KWKGEKRS | FTAWEKDMTLGEAMK | S   | V   | P   | V   | Y   | Q   |
| OXA-23-like_QJP32450_1.A.B. | KWKGEKRS | FTAWEKDMTLGEAMK | S   | V   | P   | V   | Y   | Q   |
| OXA-23-like_QJH23301_1.A.B. | KWKGEKRS | FTAWEKDMTLGEAMK | S   | V   | P   | V   | Y   | Q   |
| OXA-23-like_QJH19267_1.A.B. | KWKGEKRS | FTAWEKDMTLGEAMK | S   | V   | P   | V   | Y   | Q   |
| OXA-23-like_QJH16482_1.A.B. | KWKGEKRS | FTAWEKDMTLGEAMK | S   | V   | P   | V   | Y   | Q   |
| OXA-23-like_QJH15745_1.A.B. | KWKGEKRS | FTAWEKDMTLGEAMK | S   | V   | P   | V   | Y   | Q   |
| OXA-23-like_QJH15717_1.A.B. | KWKGEKRS | FTAWEKDMTLGEAMK | S   | V   | P   | V   | Y   | Q   |
| OXA-23-like_QJH08361_1.A.B. | KWKGEKRS | FTAWEKDMTLGEAMK | S   | V   | P   | V   | Y   | Q   |
| OXA-23-like_QJH12331_1.A.B. | KWKGEKRS | FTAWEKDMTLGEAMK | S   | V   | P   | V   | Y   | Q   |
| OXA-23-like_QJH05456_1.A.B. | KWKGEKRS | FTAWEKDMTLGEAMK | S   | V   | P   | V   | Y   | Q   |
| OXA-23-like_QJH00715_1.A.B. | KWKGEKRS | FTAWEKDMTLGEAMK | S   | V   | P   | V   | Y   | Q   |
| OXA-23-like_QJG95773_1.A.B. | KWKGEKRS | FTAWEKDMTLGEAMK | S   | V   | P   | V   | Y   | Q   |
| OXA-23-like_QJG96932_1.A.B. | KWKGEKRS | FTAWEKDMTLGEAMK | S   | V   | P   | V   | Y   | Q   |
| OXA-23-like_QJG96957_1.A.B. | KWKGEKRS | FTAWEKDMTLGEAMK | S   | V   | P   | V   | Y   | Q   |
| OXA-23-like_QJH00689_1.A.B. | KWKGEKRS | FTAWEKDMTLGEAMK | S   | V   | P   | V   | Y   | Q   |
| OXA-23-like_AOX88011_1.A.B. | KWKGEKRS | FTAWEKDMTLGEAMK | S   | V   | P   | V   | Y   | Q   |
| OXA-23-like_AOX91849_1.A.B. | KWKGEKRS | FTAWEKDMTLGEAMK | S   | V   | P   | V   | Y   | Q   |
| OXA-23-like_AOX95708_1.A.B. | KWKGEKRS | FTAWEKDMTLGEAMK | S   | V   | P   | V   | Y   | Q   |
| OXA-23-like_APM50633_1.A.B. | KWKGEKRS | FTAWEKDMTLGEAMK | S   | V   | P   | V   | Y   | Q   |
| OXA-23-like_APM50651_1.A.B. | KWKGEKRS | FTAWEKDMTLGEAMK | S   | V   | P   | V   | Y   | Q   |
| OXA-23-like_AQU56756_1.A.B. | KWKGEKRS | FTAWEKDMTLGEAMK | S   | V   | P   | V   | Y   | Q   |
| OXA-23-like_AQU56788_1.A.B. | KWKGEKRS | FTAWEKDMTLGEAMK | S   | V   | P   | V   | Y   | Q   |
| OXA-23-like_ARF92486_1.A.B. | KWKGEKRS | FTAWEKDMTLGEAMK | S   | V   | P   | V   | Y   | Q   |
| OXA-23-like_ARF92497_1.A.B. | KWKGEKRS | FTAWEKDMTLGEAMK | S   | V   | P   | V   | Y   | Q   |
| OXA-23-like_ARF95290_1.A.B. | KWKGEKRS | FTAWEKDMTLGEAMK | S   | V   | P   | V   | Y   | Q   |
| OXA-23-like_ARF96125_1.A.B. | KWKGEKRS | FTAWEKDMTLGEAMK | S   | V   | P   | V   | Y   | Q   |
| OXA-23-like_ARG05487_1.A.B. | KWKGEKRS | FTAWEKDMTLGEAMK | S   | V   | P   | V   | Y   | Q   |
| OXA-23-like_ARG10150_1.A.B. | KWKGEKRS | FTAWEKDMTLGEAMK | S   | V   | P   | V   | Y   | Q   |
| OXA-23-like_ARG12999_1.A.B. | KWKGEKRS | FTAWEKDMTLGEAMK | S   | V   | P   | V   | Y   | Q   |
| OXA-23-like_ARG19192_1.A.B. | KWKGEKRS | FTAWEKDMTLGEAMK | S   | V   | P   | V   | Y   | Q   |
| OXA-23-like_ARG19219_1.A.B. | KWKGEKRS | FTAWEKDMTLGEAMK | S   | V   | P   | V   | Y   | Q   |
| OXA-23-like_ARG28873_1.A.B. | KWKGEKRS | FTAWEKDMTLGEAMK | S   | V   | P   | V   | Y   | Q   |
| OXA-23-like_ARG28898_1.A.B. | KWKGEKRS | FTAWEKDMTLGEAMK | S   | V   | P   | V   | Y   | Q   |
| OXA-23-like_ARG30155_1.A.B. | KWKGEKRS | FTAWEKDMTLGEAMK | S   | V   | P   | V   | Y   | Q   |
| OXA-23-like_ARG35250_1.A.B. | KWKGEKRS | FTAWEKDMTLGEAMK | S   | V   | P   | V   | Y   | Q   |
| OXA-23-like_ASF49900_1.A.B. | KWKGEKRS | FTAWEKDMTLGEAMK | S   | V   | P   | V   | Y   | Q   |

family

OXA-23-like\_QRN19109.1\_A.B.  
acc



*OXA-23-like* *QQE03160.1* A.b.

| OXA-23-like_QQE03160_1.A.B. | α6  |     |     |     | α7  |     |     |     | β3  |     | β4  |     |
|-----------------------------|-----|-----|-----|-----|-----|-----|-----|-----|-----|-----|-----|-----|
|                             | 170 | 180 | 190 | 200 | 210 | 220 | 230 | 240 | 250 | 260 | 270 | 280 |
| OXA-23-like_QQE03160_1.A.B. | D   | N   | F   | W   | L   | V   | G   | P   | L   | K   | V   | T   |
| OXA-23-like_QQE03411_1.A.B. | D   | N   | F   | W   | L   | V   | G   | P   | L   | K   | V   | T   |
| OXA-23-like_QQP96609_1.A.B. | D   | N   | F   | W   | L   | V   | G   | P   | L   | K   | V   | T   |
| OXA-23-like_QQP99362_1.A.B. | D   | N   | F   | W   | L   | V   | G   | P   | L   | K   | V   | T   |
| OXA-23-like_QQP95815_1.A.B. | D   | N   | F   | W   | L   | V   | G   | P   | L   | K   | V   | T   |
| OXA-23-like_QQP95566_1.A.B. | D   | N   | F   | W   | L   | V   | G   | P   | L   | K   | V   | T   |
| OXA-23-like_QQP93073_1.A.B. | D   | N   | F   | W   | L   | V   | G   | P   | L   | K   | V   | T   |
| OXA-23-like_QQP92824_1.A.B. | D   | N   | F   | W   | L   | V   | G   | P   | L   | K   | V   | T   |
| OXA-23-like_QQB67579_1.A.B. | D   | N   | F   | W   | L   | V   | G   | P   | L   | K   | V   | T   |
| OXA-23-like_QQB65684_1.A.B. | D   | N   | F   | W   | L   | V   | G   | P   | L   | K   | V   | T   |
| OXA-23-like_QP003745_1.A.B. | D   | N   | F   | W   | L   | V   | G   | P   | L   | K   | V   | T   |
| OXA-23-like_QP000239_1.A.B. | D   | N   | F   | W   | L   | V   | G   | P   | L   | K   | V   | T   |
| OXA-23-like_QLG80230_1.A.B. | D   | N   | F   | W   | L   | V   | G   | P   | L   | K   | V   | T   |
| OXA-23-like_QLA71954_1.A.B. | D   | N   | F   | W   | L   | V   | G   | P   | L   | K   | V   | T   |
| OXA-23-like_QJP32450_1.A.B. | D   | N   | F   | W   | L   | V   | G   | P   | L   | K   | V   | T   |
| OXA-23-like_QJH23301_1.A.B. | D   | N   | F   | W   | L   | V   | G   | P   | L   | K   | V   | T   |
| OXA-23-like_QJH19267_1.A.B. | D   | N   | F   | W   | L   | V   | G   | P   | L   | K   | V   | T   |
| OXA-23-like_QJH16482_1.A.B. | D   | N   | F   | W   | L   | V   | G   | P   | L   | K   | V   | T   |
| OXA-23-like_QJH15745_1.A.B. | D   | N   | F   | W   | L   | V   | G   | P   | L   | K   | V   | T   |
| OXA-23-like_QJH15717_1.A.B. | D   | N   | F   | W   | L   | V   | G   | P   | L   | K   | V   | T   |
| OXA-23-like_QJH08361_1.A.B. | D   | N   | F   | W   | L   | V   | G   | P   | L   | K   | V   | T   |
| OXA-23-like_QJH12331_1.A.B. | D   | N   | F   | W   | L   | V   | G   | P   | L   | K   | V   | T   |
| OXA-23-like_QJH05456_1.A.B. | D   | N   | F   | W   | L   | V   | G   | P   | L   | K   | V   | T   |
| OXA-23-like_QJH00715_1.A.B. | D   | N   | F   | W   | L   | V   | G   | P   | L   | K   | V   | T   |
| OXA-23-like_QJG95773_1.A.B. | D   | N   | F   | W   | L   | V   | G   | P   | L   | K   | V   | T   |
| OXA-23-like_QJG96932_1.A.B. | D   | N   | F   | W   | L   | V   | G   | P   | L   | K   | V   | T   |
| OXA-23-like_QJG96957_1.A.B. | D   | N   | F   | W   | L   | V   | G   | P   | L   | K   | V   | T   |
| OXA-23-like_QJH00689_1.A.B. | D   | N   | F   | W   | L   | V   | G   | P   | L   | K   | V   | T   |
| OXA-23-like_AOX88011_1.A.B. | D   | N   | F   | W   | L   | V   | G   | P   | L   | K   | V   | T   |
| OXA-23-like_AOX91849_1.A.B. | D   | N   | F   | W   | L   | V   | G   | P   | L   | K   | V   | T   |
| OXA-23-like_AOX95708_1.A.B. | D   | N   | F   | W   | L   | V   | G   | P   | L   | K   | V   | T   |
| OXA-23-like_APM50633_1.A.B. | D   | N   | F   | W   | L   | V   | G   | P   | L   | K   | V   | T   |
| OXA-23-like_APM50651_1.A.B. | D   | N   | F   | W   | L   | V   | G   | P   | L   | K   | V   | T   |
| OXA-23-like_AQU56756_1.A.B. | D   | N   | F   | W   | L   | V   | G   | P   | L   | K   | V   | T   |
| OXA-23-like_AQU56788_1.A.B. | D   | N   | F   | W   | L   | V   | G   | P   | L   | K   | V   | T   |
| OXA-23-like_ARF92486_1.A.B. | D   | N   | F   | W   | L   | V   | G   | P   | L   | K   | V   | T   |
| OXA-23-like_ARF92497_1.A.B. | D   | N   | F   | W   | L   | V   | G   | P   | L   | K   | V   | T   |
| OXA-23-like_ARF95290_1.A.B. | D   | N   | F   | W   | L   | V   | G   | P   | L   | K   | V   | T   |
| OXA-23-like_ARF96125_1.A.B. | D   | N   | F   | W   | L   | V   | G   | P   | L   | K   | V   | T   |
| OXA-23-like_ARG05487_1.A.B. | D   | N   | F   | W   | L   | V   | G   | P   | L   | K   | V   | T   |
| OXA-23-like_ARG01050_1.A.B. | D   | N   | F   | W   | L   | V   | G   | P   | L   | K   | V   | T   |
| OXA-23-like_ARG12999_1.A.B. | D   | N   | F   | W   | L   | V   | G   | P   | L   | K   | V   | T   |
| OXA-23-like_ARG19192_1.A.B. | D   | N   | F   | W   | L   | V   | G   | P   | L   | K   | V   | T   |
| OXA-23-like_ARG19219_1.A.B. | D   | N   |     |     |     |     |     |     |     |     |     |     |

# OXA-23-like subfamily

|                             |                                                             |
|-----------------------------|-------------------------------------------------------------|
| OXA-23-like_AOX72443.1 A.b. | DNFWLVGPLKVTPIQEVFVSVLAHTQLPFSEKVOANVKNMMLLEESNGYKIFGKTGWAM |
| OXA-23-like_AOX68171.1 A.b. | DNFWLVGPLKVTPIQEVFVSVLAHTQLPFSEKVOANVKNMMLLEESNGYKIFGKTGWAM |
| OXA-23-like_AMC14310.1 A.b. | DNFWLVGPLKVTPIQEVFVSVLAHTQLPFSEKVOANVKNMMLLEESNGYKIFGKTGWAM |
| OXA-23-like_AMC14301.1 A.b. | DNFWLVGPLKVTPIQEVFVSVLAHTQLPFSEKVOANVKNMMLLEESNGYKIFGKTGWAM |
| OXA-23-like_ALY00722.1 A.b. | DNFWLVGPLKVTPIQEVFVSVLAHTQLPFSEKVOANVKNMMLLEESNGYKIFGKTGWAM |
| OXA-23-like_ALX98871.1 A.b. | DNFWLVGPLKVTPIQEVFVSVLAHTQLPFSEKVOANVKNMMLLEESNGYKIFGKTGWAM |
| OXA-23-like_AKA30333.1 A.b. | DNFWLVGPLKVTPIQEVFVSVLAHTQLPFSEKVOANVKNMMLLEESNGYKIFGKTGWAM |
| OXA-23-like_AGQ10499.1 A.b. | DNFWLVGPLKVTPIQEVFVSVLAHTQLPFSEKVOANVKNMMLLEESNGYKIFGKTGWAM |
| OXA-23-like_AGQ05635.1 A.b. | DNFWLVGPLKVTPIQEVFVSVLAHTQLPFSEKVOANVKNMMLLEESNGYKIFGKTGWAM |
| OXA-23-like_ACJ39972.1 A.b. | DNFWLVGPLKVTPIQEVFVSVLAHTQLPFSEKVOANVKNMMLLEESNGYKIFGKTGWAM |
| OXA-23-like_QKK06748.1 A.b. | DNFWLVGPLKVTPIQEVFVSVLAHTQLPFSEKVOANVKNMMLLEESNGYKIFGKTGWAM |
| OXA-23-like_QKK76707.1 A.b. | DNFWLVGPLKVTPIQEVFVSVLAHTQLPFSEKVOANVKNMMLLEESNGYKIFGKTGWAM |
| OXA-23-like_QKK76393.1 A.b. | DNFWLVGPLKVTPIQEVFVSVLAHTQLPFSEKVOANVKNMMLLEESNGYKIFGKTGWAM |
| OXA-23-like_QFX72557.1 A.b. | DNFWLVGPLKVTPIQEVFVSVLAHTQLPFSEKVOANVKNMMLLEESNGYKIFGKTGWAM |
| OXA-23-like_QFZ56693.1 A.b. | DNFWLVGPLKVTPIQEVFVSVLAHTQLPFSEKVOANVKNMMLLEESNGYKIFGKTGWAM |
| OXA-23-like_AYC00513.1 A.b. | DNFWLVGPLKVTPIQEVFVSVLAHTQLPFSEKVOANVKNMMLLEESNGYKIFGKTGWAM |
| OXA-23-like_AYC00505.1 A.b. | DNFWLVGPLKVTPIQEVFVSVLAHTQLPFSEKVOANVKNMMLLEESNGYKIFGKTGWAM |
| OXA-23-like_ARG39357.1 A.b. | DNFWLVGPLKVTPIQEVFVSVLAHTQLPFSEKVOANVKNMMLLEESNGYKIFGKTGWAM |
| OXA-23-like_ARG23739.1 A.b. | DNFWLVGPLKVTPIQEVFVSVLAHTQLPFSEKVOANVKNMMLLEESNGYKIFGKTGWAM |
| OXA-23-like_ARG23713.1 A.b. | DNFWLVGPLKVTPIQEVFVSVLAHTQLPFSEKVOANVKNMMLLEESNGYKIFGKTGWAM |
| OXA-23-like_ARG03186.1 A.b. | DNFWLVGPLKVTPIQEVFVSVLAHTQLPFSEKVOANVKNMMLLEESNGYKIFGKTGWAM |
| OXA-23-like_AEP06450.2 A.b. | DNFWLVGPLKVTPIQEVFVSVLAHTQLPFSEKVOANVKNMMLLEESNGYKIFGKTGWAM |
| OXA-23-like_AML75286.1 A.b. | DNFWLVGPLKVTPIQEVFVSVLAHTQLPFSEKVOANVKNMMLLEESNGYKIFGKTGWAM |
| OXA-23-like_AML75277.1 A.b. | DNFWLVGPLKVTPIQEVFVSVLAHTQLPFSEKVOANVKNMMLLEESNGYKIFGKTGWAM |
| OXA-23-like_AML71526.1 A.b. | DNFWLVGPLKVTPIQEVFVSVLAHTQLPFSEKVOANVKNMMLLEESNGYKIFGKTGWAM |
| OXA-23-like_AML69469.1 A.b. | DNFWLVGPLKVTPIQEVFVSVLAHTQLPFSEKVOANVKNMMLLEESNGYKIFGKTGWAM |
| OXA-23-like_AML66436.1 A.b. | DNFWLVGPLKVTPIQEVFVSVLAHTQLPFSEKVOANVKNMMLLEESNGYKIFGKTGWAM |
| OXA-23-like_AML65160.1 A.b. | DNFWLVGPLKVTPIQEVFVSVLAHTQLPFSEKVOANVKNMMLLEESNGYKIFGKTGWAM |
| OXA-23-like_AML65128.1 A.b. | DNFWLVGPLKVTPIQEVFVSVLAHTQLPFSEKVOANVKNMMLLEESNGYKIFGKTGWAM |
| OXA-23-like_AML0602.1 A.b.  | DNFWLVGPLKVTPIQEVFVSVLAHTQLPFSEKVOANVKNMMLLEESNGYKIFGKTGWAM |
| OXA-23-like_AMN00587.1 A.b. | DNFWLVGPLKVTPIQEVFVSVLAHTQLPFSEKVOANVKNMMLLEESNGYKIFGKTGWAM |
| OXA-23-like_AMN00578.1 A.b. | DNFWLVGPLKVTPIQEVFVSVLAHTQLPFSEKVOANVKNMMLLEESNGYKIFGKTGWAM |
| OXA-23-like_AMN00569.1 A.b. | DNFWLVGPLKVTPIQEVFVSVLAHTQLPFSEKVOANVKNMMLLEESNGYKIFGKTGWAM |
| OXA-23-like_QJF37605.1 A.b. | DNFWLVGPLKVTPIQEVFVSVLAHTQLPFSEKVOANVKNMMLLEESNGYKIFGKTGWAM |
| OXA-23-like_QJF33717.1 A.b. | DNFWLVGPLKVTPIQEVFVSVLAHTQLPFSEKVOANVKNMMLLEESNGYKIFGKTGWAM |
| OXA-23-like_QJH05102.1 A.b. | DNFWLVGPLKVTPIQEVFVSVLAHTQLPFSEKVOANVKNMMLLEESNGYKIFGKTGWAM |
| OXA-23-like_QJH23846.1 A.b. | DNFWLVGPLKVTPIQEVFVSVLAHTQLPFSEKVOANVKNMMLLEESNGYKIFGKTGWAM |
| OXA-23-like_QCH35083.1 A.b. | DNFWLVGPLKVTPIQEVFVSVLAHTQLPFSEKVOANVKNMMLLEESNGYKIFGKTGWAM |
| OXA-23-like_QAT07029.1 A.b. | DNFWLVGPLKVTPIQEVFVSVLAHTQLPFSEKVOANVKNMMLLEESNGYKIFGKTGWAM |
| OXA-23-like_QAS99734.1 A.b. | DNFWLVGPLKVTPIQEVFVSVLAHTQLPFSEKVOANVKNMMLLEESNGYKIFGKTGWAM |
| OXA-23-like_AVE56824.1 A.b. | DNFWLVGPLKVTPIQEVFVSVLAHTQLPFSEKVOANVKNMMLLEESNGYKIFGKTGWAM |
| OXA-23-like_AVE44374.1 A.b. | DNFWLVGPLKVTPIQEVFVSVLAHTQLPFSEKVOANVKNMMLLEESNGYKIFGKTGWAM |
| OXA-23-like_ATR89604.1 A.b. | DNFWLVGPLKVTPIQEVFVSVLAHTQLPFSEKVOANVKNMMLLEESNGYKIFGKTGWAM |
| OXA-23-like_ARG29802.1 A.b. | DNFWLVGPLKVTPIQEVFVSVLAHTQLPFSEKVOANVKNMMLLEESNGYKIFGKTGWAM |
| OXA-23-like_APF45746.1 A.b. | DNFWLVGPLKVTPIQEVFVSVLAHTQLPFSEKVOANVKNMMLLEESNGYKIFGKTGWAM |
| OXA-23-like_APQ95067.1 A.b. | DNFWLVGPLKVTPIQEVFVSVLAHTQLPFSEKVOANVKNMMLLEESNGYKIFGKTGWAM |
| OXA-23-like_APQ87413.1 A.b. | DNFWLVGPLKVTPIQEVFVSVLAHTQLPFSEKVOANVKNMMLLEESNGYKIFGKTGWAM |
| OXA-23-like_ATR88802.1 A.b. | DNFWLVGPLKVTPIQEVFVSVLAHTQLPFSEKVOANVKNMMLLEESNGYKIFGKTGWAM |
| OXA-23-like_ATR88943.1 A.b. | DNFWLVGPLKVTPIQEVFVSVLAHTQLPFSEKVOANVKNMMLLEESNGYKIFGKTGWAM |
| OXA-23-like_SBS23848.1 A.b. | DNFWLVGPLKVTPIQEVFVSVLAHTQLPFSEKVOANVKNMMLLEESNGYKIFGKTGWAM |
| OXA-23-like_AOP62462.1 A.b. | DNFWLVGPLKVTPIQEVFVSVLAHTQLPFSEKVOANVKNMMLLEESNGYKIFGKTGWAM |
| 4JF4_Beta-lactamase         | DNFWLVGPLKVTPIQEVFVSVLAHTQLPFSEKVOANVKNMMLLEESNGYKIFGKTGWAM |
| OXA-23-like_QCP18237.1 A.b. | DNFWLVGPLKVTPIQEVFVSVLAHTQLPFSEKVOANVKNMMLLEESNGYKIFGKTGWAM |
| OXA-23-like_QRN19109.1 A.b. | DNFWLVGPLKVTPIQEVFVSVLAHTQLPFSEKVOANVKNMMLLEESNGYKIFGKTGWAM |

acc

*OXA-23-like\_QQE03160.1\_A.b.*

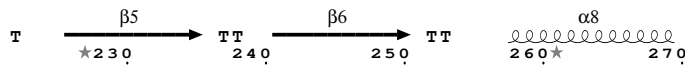[illegible]



# OXA-23-like subfamily

|                        |      |                                                      |
|------------------------|------|------------------------------------------------------|
| OXA-23-like_AOX72443.1 | A.b. | DIKPQVGWLTGWVEQPDGKIVAFALNMEMRSEMPASIRNELLMKSLKQLNII |
| OXA-23-like_AOX68171.1 | A.b. | DIKPQVGWLTGWVEQPDGKIVAFALNMEMRSEMPASIRNELLMKSLKQLNII |
| OXA-23-like_AMC14310.1 | A.b. | DIKPQVGWLTGWVEQPDGKIVAFALNMEMRSEMPASIRNELLMKSLKQLNII |
| OXA-23-like_AMC14301.1 | A.b. | DIKPQVGWLTGWVEQPDGKIVAFALNMEMRSEMPASIRNELLMKSLKQLNII |
| OXA-23-like_ALY00722.1 | A.b. | DIKPQVGWLTGWVEQPDGKIVAFALNMEMRSEMPASIRNELLMKSLKQLNII |
| OXA-23-like_ALX98871.1 | A.b. | DIKPQVGWLTGWVEQPDGKIVAFALNMEMRSEMPASIRNELLMKSLKQLNII |
| OXA-23-like_AKA30333.1 | A.b. | DIKPQVGWLTGWVEQPDGKIVAFALNMEMRSEMPASIRNELLMKSLKQLNII |
| OXA-23-like_AGQ10499.1 | A.b. | DIKPQVGWLTGWVEQPDGKIVAFALNMEMRSEMPASIRNELLMKSLKQLNII |
| OXA-23-like_AGO05635.1 | A.b. | DIKPQVGWLTGWVEQPDGKIVAFALNMEMRSEMPASIRNELLMKSLKQLNII |
| OXA-23-like_ACJ39972.1 | A.b. | DIKPQVGWLTGWVEQPDGKIVAFALNMEMRSEMPASIRNELLMKSLKQLNII |
| OXA-23-like_QKK06748.1 | A.b. | DIKPQVGWLTGWVEQPDGKIVAFALNMEMRSEMPASIRNELLMKSLKQLNII |
| OXA-23-like_QKK76707.1 | A.b. | DIKPQVGWLTGWVEQPDGKIVAFALNMEMRSEMPASIRNELLMKSLKQLNII |
| OXA-23-like_QKK76393.1 | A.b. | DIKPQVGWLTGWVEQPDGKIVAFALNMEMRSEMPASIRNELLMKSLKQLNII |
| OXA-23-like_QFX72557.1 | A.b. | DIKPQVGWLTGWVEQPDGKIVAFALNMEMRSEMPASIRNELLMKSLKQLNII |
| OXA-23-like_QFZ56693.1 | A.b. | DIKPQVGWLTGWVEQPDGKIVAFALNMEMRSEMPASIRNELLMKSLKQLNII |
| OXA-23-like_AYC00513.1 | A.b. | DIKPQVGWLTGWVEQPDGKIVAFALNMEMRSEMPASIRNELLMKSLKQLNII |
| OXA-23-like_AYC00505.1 | A.b. | DIKPQVGWLTGWVEQPDGKIVAFALNMEMRSEMPASIRNELLMKSLKQLNII |
| OXA-23-like_ARG39357.1 | A.b. | DIKPQVGWLTGWVEQPDGKIVAFALNMEMRSEMPASIRNELLMKSLKQLNII |
| OXA-23-like_ARG23739.1 | A.b. | DIKPQVGWLTGWVEQPDGKIVAFALNMEMRSEMPASIRNELLMKSLKQLNII |
| OXA-23-like_ARG23713.1 | A.b. | DIKPQVGWLTGWVEQPDGKIVAFALNMEMRSEMPASIRNELLMKSLKQLNII |
| OXA-23-like_ARG03186.1 | A.b. | DIKPQVGWLTGWVEQPDGKIVAFALNMEMRSEMPASIRNELLMKSLKQLNII |
| OXA-23-like_AEP06450.2 | A.b. | DIKPQVGWLTGWVEQPDGKIVAFALNMEMRSEMPASIRNELLMKSLKQLNII |
| OXA-23-like_AML75286.1 | A.b. | DIKPQVGWLTGWVEQPDGKIVAFALNMEMRSEMPASIRNELLMKSLKQLNII |
| OXA-23-like_AML75277.1 | A.b. | DIKPQVGWLTGWVEQPDGKIVAFALNMEMRSEMPASIRNELLMKSLKQLNII |
| OXA-23-like_AML71526.1 | A.b. | DIKPQVGWLTGWVEQPDGKIVAFALNMEMRSEMPASIRNELLMKSLKQLNII |
| OXA-23-like_AML69469.1 | A.b. | DIKPQVGWLTGWVEQPDGKIVAFALNMEMRSEMPASIRNELLMKSLKQLNII |
| OXA-23-like_AML66436.1 | A.b. | DIKPQVGWLTGWVEQPDGKIVAFALNMEMRSEMPASIRNELLMKSLKQLNII |
| OXA-23-like_AML65160.1 | A.b. | DIKPQVGWLTGWVEQPDGKIVAFALNMEMRSEMPASIRNELLMKSLKQLNII |
| OXA-23-like_AML65128.1 | A.b. | DIKPQVGWLTGWVEQPDGKIVAFALNMEMRSEMPASIRNELLMKSLKQLNII |
| OXA-23-like_AMN00602.1 | A.b. | DIKPQVGWLTGWVEQPDGKIVAFALNMEMRSEMPASIRNELLMKSLKQLNII |
| OXA-23-like_AMN00587.1 | A.b. | DIKPQVGWLTGWVEQPDGKIVAFALNMEMRSEMPASIRNELLMKSLKQLNII |
| OXA-23-like_AMN00578.1 | A.b. | DIKPQVGWLTGWVEQPDGKIVAFALNMEMRSEMPASIRNELLMKSLKQLNII |
| OXA-23-like_AMN00569.1 | A.b. | DIKPQVGWLTGWVEQPDGKIVAFALNMEMRSEMPASIRNELLMKSLKQLNII |
| OXA-23-like_QJF37605.1 | A.b. | DIKPQVGWLTGWVEQPDGKIVAFALNMEMRSEMPASIRNELLMKSLKQLNII |
| OXA-23-like_QJF33717.1 | A.b. | DIKPQVGWLTGWVEQPDGKIVAFALNMEMRSEMPASIRNELLMKSLKQLNII |
| OXA-23-like_QJH05102.1 | A.b. | DIKPQVGWLTGWVEQPDGKIVAFALNMEMRSEMPASIRNELLMKSLKQLNII |
| OXA-23-like_QJH23846.1 | A.b. | DIKPQVGWLTGWVEQPDGKIVAFALNMEMRSEMPASIRNELLMKSLKQLNII |
| OXA-23-like_QCH35083.1 | A.b. | DIKPQVGWLTGWVEQPDGKIVAFALNMEMRSEMPASIRNELLMKSLKQLNII |
| OXA-23-like_QAT07029.1 | A.b. | DIKPQVGWLTGWVEQPDGKIVAFALNMEMRSEMPASIRNELLMKSLKQLNII |
| OXA-23-like_QAS99734.1 | A.b. | DIKPQVGWLTGWVEQPDGKIVAFALNMEMRSEMPASIRNELLMKSLKQLNII |
| OXA-23-like_AVE56824.1 | A.b. | DIKPQVGWLTGWVEQPDGKIVAFALNMEMRSEMPASIRNELLMKSLKQLNII |
| OXA-23-like_AVE44374.1 | A.b. | DIKPQVGWLTGWVEQPDGKIVAFALNMEMRSEMPASIRNELLMKSLKQLNII |
| OXA-23-like_ATR89604.1 | A.b. | DIKPQVGWLTGWVEQPDGKIVAFALNMEMRSEMPASIRNELLMKSLKQLNII |
| OXA-23-like_ARG29802.1 | A.b. | DIKPQVGWLTGWVEQPDGKIVAFALNMEMRSEMPASIRNELLMKSLKQLNII |
| OXA-23-like_APF45746.1 | A.b. | DIKPQVGWLTGWVEQPDGKIVAFALNMEMRSEMPASIRNELLMKSLKQLNII |
| OXA-23-like_APQ95067.1 | A.b. | DIKPQVGWLTGWVEQPDGKIVAFALNMEMRSEMPASIRNELLMKSLKQLNII |
| OXA-23-like_APQ87413.1 | A.b. | DIKPQVGWLTGWVEQPDGKIVAFALNMEMRSEMPASIRNELLMKSLKQLNII |
| OXA-23-like_ATR88802.1 | A.b. | DIKPQVGWLTGWVEQPDGKIVAFALNMEMRSEMPASIRNELLMKSLKQLNII |
| OXA-23-like_ATR88943.1 | A.b. | DIKPQVGWLTGWVEQPDGKIVAFALNMEMRSEMPASIRNELLMKSLKQLNII |
| OXA-23-like_SBS23848.1 | A.b. | DIKPQVGWLTGWVEQPDGKIVAFALNMEMRSEMPASIRNELLMKSLKQLNII |
| OXA-23-like_AOP62462.1 | A.b. | DIKPQVGWLTGWVEQPDGKIVAFALNMEMRSEMPASIRNELLMKSLKQLNII |
| 4JF4_Beta-lactamase    |      | DIKPQVGWLTGWVEQPDGKIVAFALNMEMRSEMPASIRNELLMKSLKQLNII |
| OXA-23-like_QCP18237.1 | A.b. | DIKPQVGWLTGWVEQPDGKIVAFALNMEMRSEMPASIRNELLMKSLKQLNII |
| OXA-23-like_QRN19109.1 | A.b. | DIKPQVGWLTGWVEQPDGKIVAFALNMEMRSEMPASIRNELLMKSLKQLNII |
| acc                    |      |                                                      |

# OXA-24-like subfamily

OXA-24-like\_QAB42530.1\_A.b.

OXA-24-like\_QAB42530.1\_A.b.  
OXA-24-like\_GRN23785.1\_A.b.  
OXA-24-like\_GRN23770.1\_A.b.  
OXA-24-like\_GER77259.1\_A.b.  
OXA-24-like\_QBA07845.1\_A.b.  
OXA-24-like\_QBA07837.1\_A.b.  
OXA-24-like\_AXX58331.1\_A.b.  
OXA-24-like\_AXX50759.1\_A.b.  
OXA-24-like\_AXX43427.1\_A.b.  
4WM9\_1\_Beta-lactamase  
OXA-24-like\_AWO18633.1\_A.b.  
OXA-24-like\_QLB37632.1\_A.b.

acc

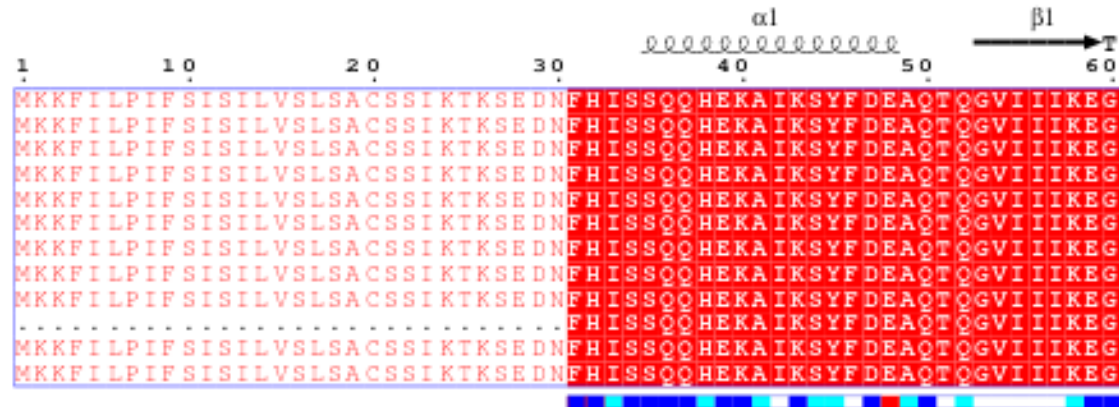

OXA-24-like\_QAB42530.1\_A.b.

OXA-24-like\_QAB42530.1\_A.b.  
OXA-24-like\_GRN23785.1\_A.b.  
OXA-24-like\_GRN23770.1\_A.b.  
OXA-24-like\_GER77259.1\_A.b.  
OXA-24-like\_QBA07845.1\_A.b.  
OXA-24-like\_QBA07837.1\_A.b.  
OXA-24-like\_AXX58331.1\_A.b.  
OXA-24-like\_AXX50759.1\_A.b.  
OXA-24-like\_AXX43427.1\_A.b.  
4WM9\_1\_Beta-lactamase  
OXA-24-like\_AWO18633.1\_A.b.  
OXA-24-like\_QLB37632.1\_A.b.

acc

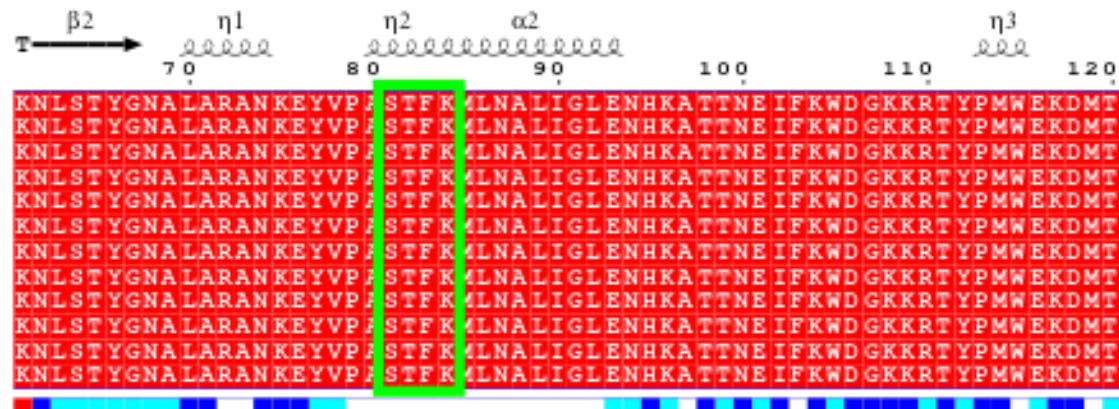

OXA-24-like\_QAB42530.1\_A.b.

OXA-24-like\_QAB42530.1\_A.b.  
OXA-24-like\_GRN23785.1\_A.b.  
OXA-24-like\_GRN23770.1\_A.b.  
OXA-24-like\_GER77259.1\_A.b.  
OXA-24-like\_QBA07845.1\_A.b.  
OXA-24-like\_QBA07837.1\_A.b.  
OXA-24-like\_AXX58331.1\_A.b.  
OXA-24-like\_AXX50759.1\_A.b.  
OXA-24-like\_AXX43427.1\_A.b.  
4WM9\_1\_Beta-lactamase  
OXA-24-like\_AWO18633.1\_A.b.  
OXA-24-like\_QLB37632.1\_A.b.

acc

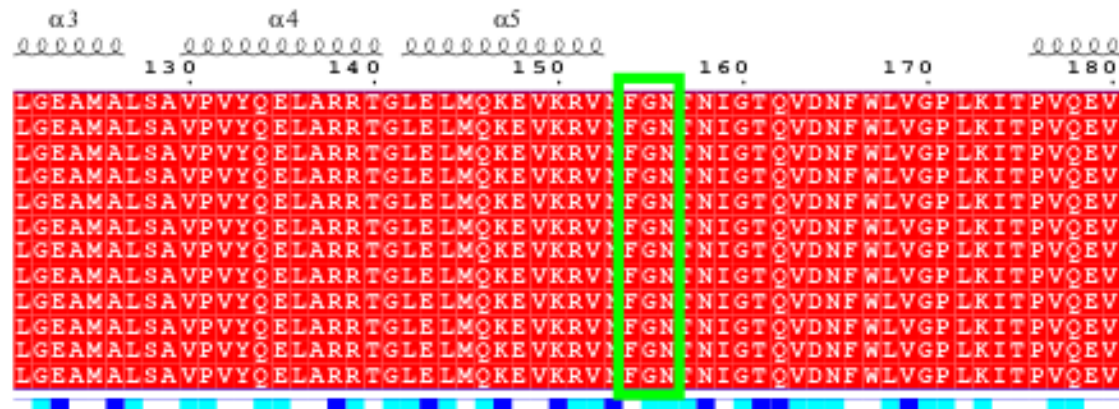

alpha6

alpha7

beta3

beta4

beta5

OXA-24-like\_QAB42530.1\_A.b. 

OXA-24-like\_QAB42530.1\_A.b. NFADD LAHNRLPFFKLETQE EVKKMLLIKEVNGSKIYK KSG WGM DVT PQVGWLTGWVEQAN

OXA-24-like\_QRN23785.1\_A.b. NFADD LAHNRLPFFKLETQE EVKKMLLIKEVNGSKIYK KSG WGM DVT PQVGWLTGWVEQAN

OXA-24-like\_QRN23770.1\_A.b. NFADD LAHNRLPFFKLETQE EVKKMLLIKEVNGSKIYK KSG WGM DVT PQVGWLTGWVEQAN

OXA-24-like\_QER77259.1\_A.b. NFADD LAHNRLPFFKLETQE EVKKMLLIKEVNGSKIYK KSG WGM DVT PQVGWLTGWVEQAN

OXA-24-like\_QBA07845.1\_A.b. NFADD LAHNRLPFFKLETQE EVKKMLLIKEVNGSKIYK KSG WGM DVT PQVGWLTGWVEQAN

OXA-24-like\_QBA07837.1\_A.b. NFADD LAHNRLPFFKLETQE EVKKMLLIKEVNGSKIYK KSG WGM DVT PQVGWLTGWVEQAN

OXA-24-like\_AXX58331.1\_A.b. NFADD LAHNRLPFFKLETQE EVKKMLLIKEVNGSKIYK KSG WGM DVT PQVGWLTGWVEQAN

OXA-24-like\_AXX50759.1\_A.b. NFADD LAHNRLPFFKLETQE EVKKMLLIKEVNGSKIYK KSG WGM DVT PQVGWLTGWVEQAN

OXA-24-like\_AXX43427.1\_A.b. NFADD LAHNRLPFFKLETQE EVKKMLLIKEVNGSKIYK KSG WGM DVT PQVGWLTGWVEQAN

4WM9\_1\_Beta-lactamase NFADD LAHNRLPFFKLETQE EVKKMLLIKEVNGSKIYK KSG WGM DVT PQVGWLTGWVEQAN

OXA-24-like\_AWO18633.1\_A.b. NFADD LAHNRLPFFKLETQE EVKKMLLIKEVNGSKIYK KSG WGM DVT PQVGWLTGWVEQAN

OXA-24-like\_QLB37632.1\_A.b. NFADD LAHNRLPFFKLETQE EVKKMLLIKEVNGSKIYK KSG WGM DVT PQVGWLTGWVEQAN

acc 

OXA-24-like\_QAB42530.1\_A.b. 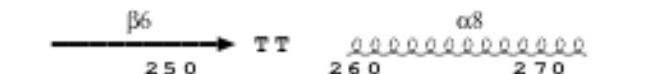

OXA-24-like\_QAB42530.1\_A.b. GKKIPFSLN LEMKEGMSG S IRNEITYKSLENLGII

OXA-24-like\_QRN23785.1\_A.b. GKKIPFSLN LEMKEGMSG S IRNEITYKSLENLGII

OXA-24-like\_QRN23770.1\_A.b. GKKIPFSLN LEMKEGMSG S IRNEITYKSLENLGII

OXA-24-like\_QER77259.1\_A.b. GKKIPFSLN LEMKEGMSG S IRNEITYKSLENLGII

OXA-24-like\_QBA07845.1\_A.b. GKKIPFSLN LEMKEGMSG S IRNEITYKSLENLGII

OXA-24-like\_QBA07837.1\_A.b. GKKIPFSLN LEMKEGMSG S IRNEITYKSLENLGII

OXA-24-like\_AXX58331.1\_A.b. GKKIPFSLN LEMKEGMSG S IRNEITYKSLENLGII

OXA-24-like\_AXX50759.1\_A.b. GKKIPFSLN LEMKEGMSG S IRNEITYKSLENLGII

OXA-24-like\_AXX43427.1\_A.b. GKKIPFSLN LEMKEGMSG S IRNEITYKSLENLGII

4WM9\_1\_Beta-lactamase GKKIPFSLN LEMKEGMSG S IRNEITYKSLENLGII

OXA-24-like\_AWO18633.1\_A.b. GKKIPFSLN LEMKEGMSG S IRNEITYKSLENLGII

OXA-24-like\_QLB37632.1\_A.b. GKKIPFSLN LEMKEGMSG S IRNEITYKSLENLGII

acc 

OXA-24-like subfamily



*OXA-33-like AWT34042.1 P.a.*

acc

*OXA-33-like AWT34042.1 P.a.*

***acc***

*OXA-33-like AWT34042.1 P.a.*

***acc***

OXA-33-like AWT34042.1 P.a.

**acc**

OXA-33-like AWT34042.1 P.a.

***acc***

OXA-50-like subfamily

|                              | TTT         | TTT                 |         | $\eta$        | $\alpha$ | $\beta$ | $\beta$ | $\alpha$ |
|------------------------------|-------------|---------------------|---------|---------------|----------|---------|---------|----------|
|                              | 1           | 10                  |         | 20            | 30       | 40      | 50      | 60       |
| OXA-50-like_QQW22444.1_P.a.  | MRPLFSALLLL | SGHAQASEWNDSRAVDKLF | GGAAGVK | TFVLYDVQRQRYV | GHDRERA  |         |         |          |
| OXA-50-like_QGQ00241.1_P.a.  | MRPLFSALLLL | SGHAQASEWNDSRAVDKLF | GGAAGVK | TFVLYDVQRQRYV | GHDRERA  |         |         |          |
| OXA-50-like_QYK19268.1_P.a.  | MRPLFSALLLL | SGHAQASEWNDSRAVDKLF | GGAAGVK | TFVLYDVQRQRYV | GHDRERA  |         |         |          |
| OXA-50-like_QQW06309.1_P.a.  | MRPLFSALLLL | SGHAQASEWNDSRAVDKLF | GGAAGVK | TFVLYDVQRQRYV | GHDRERA  |         |         |          |
| OXA-50-like_QKV61463.1_P.a.  | MRPLFSALLLL | SGHAQASEWNDSRAVDKLF | GGAAGVK | TFVLYDVQRQRYV | GHDRERA  |         |         |          |
| OXA-50-like_QPP39331.1_P.a.  | MRPLFSALLLL | SGHAQASEWNDSRAVDKLF | GGAAGVK | TFVLYDVQRQRYV | GHDRERA  |         |         |          |
| OXA-50-like_QNE62162.1_P.a.  | MRPLFSALLLL | SGHAQASEWNDSRAVDKLF | GGAAGVK | TFVLYDVQRQRYV | GHDRERA  |         |         |          |
| OXA-50-like_QLF44164.1_P.a.  | MRPLFSALLLL | SGHAQASEWNDSRAVDKLF | GGAAGVK | TFVLYDVQRQRYV | GHDRERA  |         |         |          |
| OXA-50-like_QLF18710.1_P.a.  | MRPLFSALLLL | SGHAQASEWNDSRAVDKLF | GGAAGVK | TFVLYDVQRQRYV | GHDRERA  |         |         |          |
| OXA-50-like_QEK46239.1_P.a.  | MRPLFSALLLL | SGHAQASEWNDSRAVDKLF | GGAAGVK | TFVLYDVQRQRYV | GHDRERA  |         |         |          |
| OXA-50-like_QJA41232.1_P.a.  | MRPLFSALLLL | SGHAQASEWNDSRAVDKLF | GGAAGVK | TFVLYDVQRQRYV | GHDRERA  |         |         |          |
| OXA-50-like_AYZ58090.1_P.a.  | MRPLFSALLLL | SGHAQASEWNDSRAVDKLF | GGAAGVK | TFVLYDVQRQRYV | GHDRERA  |         |         |          |
| OXA-50-like_QDR20381.1_P.a.  | MRPLFSALLLL | SGHAQASEWNDSRAVDKLF | GGAAGVK | TFVLYDVQRQRYV | GHDRERA  |         |         |          |
| OXA-50-like_AYW65966.1_P.a.  | MRPLFSALLLL | SGHAQASEWNDSRAVDKLF | GGAAGVK | TFVLYDVQRQRYV | GHDRERA  |         |         |          |
| OXA-50-like_AYZ45913.1_P.a.  | MRPLFSALLLL | SGHAQASEWNDSRAVDKLF | GGAAGVK | TFVLYDVQRQRYV | GHDRERA  |         |         |          |
| OXA-50-like_AYK26584.1_P.a.  | MRPLFSALLLL | SGHAQASEWNDSRAVDKLF | GGAAGVK | TFVLYDVQRQRYV | GHDRERA  |         |         |          |
| OXA-50-like_ASM88695.1_P.a.  | MRPLFSALLLL | SGHAQASEWNDSRAVDKLF | GGAAGVK | TFVLYDVQRQRYV | GHDRERA  |         |         |          |
| OXA-50-like_AUA80490.1_P.a.  | MRPLFSALLLL | SGHAQASEWNDSRAVDKLF | GGAAGVK | TFVLYDVQRQRYV | GHDRERA  |         |         |          |
| OXA-50-like_AUB05120.1_P.a.  | MRPLFSALLLL | SGHAQASEWNDSRAVDKLF | GGAAGVK | TFVLYDVQRQRYV | GHDRERA  |         |         |          |
| OXA-50-like_AVR86641.1_P.a.  | MRPLFSALLLL | SGHAQASEWNDSRAVDKLF | GGAAGVK | TFVLYDVQRQRYV | GHDRERA  |         |         |          |
| OXA-50-like_AKS57147.1_P.a.  | MRPLFSALLLL | SGHAQASEWNDSRAVDKLF | GGAAGVK | TFVLYDVQRQRYV | GHDRERA  |         |         |          |
| OXA-50-like_ALS13221.1_P.a.  | MRPLFSALLLL | SGHAQASEWNDSRAVDKLF | GGAAGVK | TFVLYDVQRQRYV | GHDRERA  |         |         |          |
| OXA-50-like_ALY73377.1_P.a.  | MRPLFSALLLL | SGHAQASEWNDSRAVDKLF | GGAAGVK | TFVLYDVQRQRYV | GHDRERA  |         |         |          |
| OXA-50-like_ANA70339.1_P.a.  | MRPLFSALLLL | SGHAQASEWNDSRAVDKLF | GGAAGVK | TFVLYDVQRQRYV | GHDRERA  |         |         |          |
| OXA-50-like_APB68390.1_P.a.  | MRPLFSALLLL | SGHAQASEWNDSRAVDKLF | GGAAGVK | TFVLYDVQRQRYV | GHDRERA  |         |         |          |
| OXA-50-like_ARI94830.1_P.a.  | MRPLFSALLLL | SGHAQASEWNDSRAVDKLF | GGAAGVK | TFVLYDVQRQRYV | GHDRERA  |         |         |          |
| OXA-50-like_ARJ01367.1_P.a.  | MRPLFSALLLL | SGHAQASEWNDSRAVDKLF | GGAAGVK | TFVLYDVQRQRYV | GHDRERA  |         |         |          |
| OXA-50-like_ASA19039.1_P.a.  | MRPLFSALLLL | SGHAQASEWNDSRAVDKLF | GGAAGVK | TFVLYDVQRQRYV | GHDRERA  |         |         |          |
| OXA-50-like_AUA74232.1_P.a.  | MRPLFSALLLL | SGHAQASEWNDSRAVDKLF | GGAAGVK | TFVLYDVQRQRYV | GHDRERA  |         |         |          |
| OXA-50-like_QCC69374.1_P.a.  | MRPLFSALLLL | SGHAQASEWNDSRAVDKLF | GGAAGVK | TFVLYDVQRQRYV | GHDRERA  |         |         |          |
| OXA-50-like_ATH06157.1_P.a.  | MRPLFSALLLL | SGHAQASEWNDSRAVDKLF | GGAAGVK | TFVLYDVQRQRYV | GHDRERA  |         |         |          |
| OXA-50-like_AZZ14888.1_P.a.  | MRPLFSALLLL | SGHAQASEWNDSRAVDKLF | GGAAGVK | TFVLYDVQRQRYV | GHDRERA  |         |         |          |
| OXA-50-like_VDK95206.1_P.a.  | MRPLFSALLLL | SGHAQASEWNDSRAVDKLF | GGAAGVK | TFVLYDVQRQRYV | GHDRERA  |         |         |          |
| OXA-50-like_VDL11569.1_P.a.  | MRPLFSALLLL | SGHAQASEWNDSRAVDKLF | GGAAGVK | TFVLYDVQRQRYV | GHDRERA  |         |         |          |
| OXA-50-like_VDL54838.1_P.a.  | MRPLFSALLLL | SGHAQASEWNDSRAVDKLF | GGAAGVK | TFVLYDVQRQRYV | GHDRERA  |         |         |          |
| OXA-50-like_VDL156340.1_P.a. | MRPLFSALLLL | SGHAQASEWNDSRAVDKLF | GGAAGVK | TFVLYDVQRQRYV | GHDRERA  |         |         |          |
| OXA-50-like_VDL57163.1_P.a.  | MRPLFSALLLL | SGHAQASEWNDSRAVDKLF | GGAAGVK | TFVLYDVQRQRYV | GHDRERA  |         |         |          |
| OXA-50-like_ALZ29437.1_P.a.  | MRPLFSALLLL | SGHAQASEWNDSRAVDKLF | GGAAGVK | TFVLYDVQRQRYV | GHDRERA  |         |         |          |
| OXA-50-like_AON10100.1_P.a.  | MRPLFSALLLL | SGHAQASEWNDSRAVDKLF | GGAAGVK | TFVLYDVQRQRYV | GHDRERA  |         |         |          |
| OXA-50-like_AON16083.1_P.a.  | MRPLFSALLLL | SGHAQASEWNDSRAVDKLF | GGAAGVK | TFVLYDVQRQRYV | GHDRERA  |         |         |          |
| OXA-50-like_AON22092.1_P.a.  | MRPLFSALLLL | SGHAQASEWNDSRAVDKLF | GGAAGVK | TFVLYDVQRQRYV | GHDRERA  |         |         |          |
| OXA-50-like_AON28079.1_P.a.  | MRPLFSALLLL | SGHAQASEWNDSRAVDKLF | GGAAGVK | TFVLYDVQRQRYV | GHDRERA  |         |         |          |
| OXA-50-like_AON34087.1_P.a.  | MRPLFSALLLL | SGHAQASEWNDSRAVDKLF | GGAAGVK | TFVLYDVQRQRYV | GHDRERA  |         |         |          |
| OXA-50-like_AON40072.1_P.a.  | MRPLFSALLLL | SGHAQASEWNDSRAVDKLF | GGAAGVK | TFVLYDVQRQRYV | GHDRERA  |         |         |          |
| OXA-50-like_AON46078.1_P.a.  | MRPLFSALLLL | SGHAQASEWNDSRAVDKLF | GGAAGVK | TFVLYDVQRQRYV | GHDRERA  |         |         |          |
| OXA-50-like_AON52080.1_P.a.  | MRPLFSALLLL | SGHAQASEWNDSRAVDKLF | GGAAGVK | TFVLYDVQRQRYV | GHDRERA  |         |         |          |
| OXA-50-like_ARG47835.1_P.a.  | MRPLFSALLLL | SGHAQASEWNDSRAVDKLF | GGAAGVK | TFVLYDVQRQRYV | GHDRERA  |         |         |          |
| OXA-50-like_ASP05026.1_P.a.  | MRPLFSALLLL | SGHAQASEWNDSRAVDKLF | GGAAGVK | TFVLYDVQRQRYV | GHDRERA  |         |         |          |
| OXA-50-like_ASP13070.1_P.a.  | MRPLFSALLLL | SGHAQASEWNDSRAVDKLF | GGAAGVK | TFVLYDVQRQRYV | GHDRERA  |         |         |          |
| OXA-50-like_AVE36468.1_P.a.  | MRPLFSALLLL | SGHAQASEWNDSRAVDKLF | GGAAGVK | TFVLYDVQRQRYV | GHDRERA  |         |         |          |
| OXA-50-like_AXL80491.1_P.a.  | MRPLFSALLLL | SGHAQASEWNDSRAVDKLF | GGAAGVK | TFVLYDVQRQRYV | GHDRERA  |         |         |          |
| OXA-50-like_QDR05681.1_P.a.  | MRPLFSALLLL | SGHAQASEWNDSRAVDKLF | GGAAGVK | TFVLYDVQRQRYV | GHDRERA  |         |         |          |
| OXA-50-like_QG376847.1_P.a.  | MRPLFSALLLL | SGHAQASEWNDSRAVDKLF | GGAAGVK | TFVLYDVQRQRYV | GHDRERA  |         |         |          |
| OXA-50-like_QKG35875.1_P.a.  | MRPLFSALLLL | SGHAQASEWNDSRAVDKLF | GGAAGVK | TFVLYDVQRQRYV | GHDRERA  |         |         |          |
| OXA-50-like_QKR24763.1_P.a.  | MRPLFSALLLL | SGHAQASEWNDSRAVDKLF | GGAAGVK | TFVLYDVQRQRYV | GHDRERA  |         |         |          |
| OXA-50-like_QQ64022.1_P.a.   | MRPLFSALLLL | SGHAQASEWNDSRAVDKLF | GGAAGVK | TFVLYDVQRQRYV | GHDRERA  |         |         |          |
| OXA-50-like_QQD36200.1_P.a.  | MRPLFSALLLL | SGHAQASEWNDSRAVDKLF | GGAAGVK | TFVLYDVQRQRYV | GHDRERA  |         |         |          |
| OXA-50-like_AON75377.1_P.a.  | MRPLFSALLLL | SGHAQASEWNDSRAVDKLF | GGAAGVK | TFVLYDVQRQRYV | GHDRERA  |         |         |          |
| OXA-50-like_QDY03768.1_P.a.  | MRPLFSALLLL | SGHAQASEWNDSRAVDKLF | GGAAGVK | TFVLYDVQRQRYV | GHDRERA  |         |         |          |
| OXA-50-like_QP46609.1_P.a.   | MRPLFSALLLL | SGHAQASEWNDSRAVDKLF | GGAAGVK | TFVLYDVQRQRYV | GHDRERA  |         |         |          |
| OXA-50-like_QT229678.1_P.a.  | MRPLFSALLLL | SGHAQASEWNDSRAVDKLF | GGAAGVK | TFVLYDVQRQRYV | GHDRERA  |         |         |          |
| OXA-50-like_QKR77815.1_P.a.  | MRPLFSALLLL | SGHAQASEWNDSRAVDKLF | GGAAGVK | TFVLYDVQRQRYV | GHDRERA  |         |         |          |
| OXA-50-like_AMA40693.1_P.a.  | MRPLFSALLLL | SGHAQASEWNDSRAVDKLF | GGAAGVK | TFVLYDVQRQRYV | GHDRERA  |         |         |          |
| OXA-50-like_QKE99620.1_P.a.  | MRPLFSALLLL | SGHAQASEWNDSRAVDKLF | GGAAGVK | TFVLYDVQRQRYV | GHDRERA  |         |         |          |
| OXA-50-like_AYV23779.1_P.a.  | MRPLFSALLLL | SGHAQASEWNDSRAVDKLF | GGAAGVK | TFVLYDVQRQRYV | GHDRERA  |         |         |          |
| OXA-50-like_ASA32790.1_P.a.  | MRPLFSALLLL | SGHAQASEWNDSRAVDKLF | GGAAGVK | TFVLYDVQRQRYV | GHDRERA  |         |         |          |
| OXA-50-like_ASD07216.1_P.a.  | MRPLFSTLLLL | SGHAQASEWNDSRAVDKLF | GGAAGVK | TFVLYDVQRQRYV | GHDRERA  |         |         |          |
| OXA-50-like_VDL31009.1_P.a.  | MRPLFSTLLLL | SGHAQASEWNDSRAVDKLF | GGAAGVK | TFVLYDVQRQRYV | GHDRERA  |         |         |          |
| OXA-50-like_VDL53067.1_P.a.  | MRPLFSTLLLL | SGHAQASEWNDSRAVDKLF | GGAAGVK | TFVLYDVQRQRYV | GHDRERA  |         |         |          |
| OXA-50-like_AYF72086.1_P.a.  | MRPLFSALLLL | SGHAQASEWNDSRAVDKLF | GGAAGVK | TFVLYDVQRQRYV | GHDRERA  |         |         |          |
| OXA-50-like_AYQ83944.1_P.a.  | MRPLFSALLLL | SGHAQASEWNDSRAVDKLF | GGAAGVK | TFVLYDVQRQRYV | GHDRERA  |         |         |          |
| OXA-50-like_AYR15974.1_P.a.  | MRPLFSALLLL | SGHAQASEWNDSRAVDKLF | GGAAGVK | TFVLYDVQRQRYV | GHDRERA  |         |         |          |
| OXA-50-like_AZN03541.1_P.a.  | MRPLFSALLLL | SGHAQASEWNDSRAVDKLF | GGAAGVK | TFVLYDVQRQRYV | GHDRERA  |         |         |          |
| OXA-50-like_AZN09267.1_P.a.  | MRPLFSALLLL | SGHAQASEWNDSRAVDKLF | GGAAGVK | TFVLYDVQRQRYV | GHDRERA  |         |         |          |
| OXA-50-like_AZN16304.1_P.a.  | MRPLFSALLLL | SGHAQASEWNDSRAVDKLF | GGAAGVK | TFVLYDVQRQRYV | GHDRERA  |         |         |          |
| OXA-50-like_AZN49449.1_P.a.  | MRPLFSALLLL | SGHAQASEWNDSRAVDKLF | GGAAGVK | TFVLYDVQRQRYV | GHDRERA  |         |         |          |
| OXA-50-like_AZN54830.1_P.a.  | MRPLFSALLLL | SGHAQASEWNDSRAVDKLF | GGAAGVK | TFVLYDVQRQRYV | GHDRERA  |         |         |          |
| OXA-50-like_AZN61319.1_P.a.  | MRPLFSALLLL | SGHAQASEWNDSRAVDKLF | GGAAGVK | TFVLYDVQRQRYV | GHDRERA  |         |         |          |
| OXA-50-like_QP271933.1_P.a.  | MRPLFSALLLL | SGHAQASEWNDSRAVDKLF | GGAAGVK | TFVLYDVQRQRYV | GHDRERA  |         |         |          |
| OXA-50-like_QQM09528.1_P.a.  | MRPLFSALLLL | SGHAQASEWNDSRAVDKLF | GGAAGVK | TFVLYDVQRQRYV | GHDRERA  |         |         |          |
| OXA-50-like_AVN44779.1_P.a.  | MRPLFSALLLL | SGHAQASEWNDSRAVDKLF | GGAAGVK | TFVLYDVQRQRYV | GHDRERA  |         |         |          |
| OXA-50-like_QKR65469.1_P.a.  | MRPLFSALLLL | SGHAQASEWNDSRAVDKLF | GGAAGVK | TFVLYDVQRQRYV | GHDRERA  |         |         |          |
| OXA-50-like_AYW63307.1_P.a.  | MRPLFSALLLL | SGHAQASEWNDSRAVDKLF | GGAAGVK | TFVLYDVQRQRYV | GHDRERA  |         |         |          |
| OXA-50-like_QP265977.1_P.a.  | MRPLFSALLLL | SGHAQASEWNDSRAVDKLF | GGAAGVK | TFVLYDVQRQRYV | GHDRERA  |         |         |          |
| OXA-50-like_QHF92313.1_P.a.  | MRPLFSALLLL | SGHTQASEWNDSRAVDKLF | GGAAGVK | TFVLYDVQRQRYV | GHDRERA  |         |         |          |
| OXA-50-like_AZM83163.1_P.a.  | MRPLFSALLLL | SGHTQASEWNDSRAVDKLF | GGAAGVK | TFVLYDVQRQRYV | GHDRERA  |         |         |          |
| OXA-50-like_ALY58484.1_P.a.  | MRPLFSALLLL | SGHTQASEWNDSRAVDKLF | GGAAGVK | TFVLYDVQRQRYV | GHDRERA  |         |         |          |
| OXA-50-like_AHA19368.1_P.a.  | MRPLFSALLLL | SGHTQASEWNDSRAVDKLF | GGAAGVK | TFVLYDVQRQRYV | GHDRERA  |         |         |          |
| OXA-50-like_ALE51523.1_P.a.  | MRPLFSALLLL | SGHTQASEWNDSRAVDKLF | GGAAGVK | TFVLYDVQRQRYV | GHDRERA  |         |         |          |
| OXA-50-like_ALY50692.1_P.a.  | MRPLFSALLLL | SGHTQASEWNDSRAVDKLF | GGAAGVK | TFVLYDVQRQRYV | GHDRERA  |         |         |          |
| OXA-50-like_ALY86245.1_P.a.  | MRPLFSALLLL | SGHTQASEWNDSRAVDKLF | GGAAGVK | TFVLYDVQRQRYV | GHDRERA  |         |         |          |
| OXA-50-like_ALZ22498.1_P.a.  | MRPLFSALLLL | SGHTQASEWNDSRAVDKLF | GGAAGVK | TFVLYDVQRQRYV | GHDRERA  |         |         |          |
| OXA-50-like_AOP60986.1_P.a.  | MRPLFSALLLL | SGHTQASEWNDSRAVDKLF | GGAAGVK | TFVLYDVQRQRYV | GHDRERA  |         |         |          |
| OXA-50-like_ASD00726.1_P.a.  | MRPLFSALLLL | SGHTQASEWNDSRAVDKLF | GGAAGVK | TFVLYDVQRQRYV | GHDRERA  |         |         |          |
| OXA-50-like_AXR31931.1_P.a.  | MRPLFSALLLL | SGHTQASEWNDSRAVDKLF | GGAAGVK | TFVLYDVQRQRYV | GHDRERA  |         |         |          |
| OXA-50-like_AYW76172.1_P.a.  | MRPLFSALLLL | SGHTQASEWNDSRAVDKLF | GGAAGVK | TFVLYDVQRQRYV | GHDRERA  |         |         |          |
| OXA-50-like_QAS76324.1_P.a.  | MRPLFSALLLL | SGHTQASEWNDSRAVDKLF | GGAAGVK | TFVLYDVQRQRYV | GHDRERA  |         |         |          |
| OXA-50-like_QDD38928.1_P.a.  | MRPLFSALLLL | SGHTQASEWNDSRAVDKLF | GGAAGVK | TFVLYDVQRQRYV | GHDRERA  |         |         |          |
| OXA-50-like_QES85928.1_P.a.  | MRPLFSALLLL | SGHTQASEWNDSRAVDKLF | GGAAGVK | TFVLYDVQRQRYV | GHDRERA  |         |         |          |
| OXA-50-like_QJH86618.1_P.a.  | MRPLFSALLLL | SGHTQASEWNDSRAVDKLF | GGAAGVK | TFVLYDVQRQRYV | GHDRERA  |         |         |          |
| OXA-50-like_QKK88642.1_P.a.  | MRPLFSALLLL | SGHTQASEWNDSRAVDKLF | GGAAGVK | TFVLYDVQRQRYV | GHDRERA  |         |         |          |
| OXA-50-like_QKR30875.1_P.a.  | MRPLFSALLLL | SGHTQASEWNDSRAVDKLF | GGAAGVK | TFVLYDVQRQRYV | GHDRERA  |         |         |          |
| OXA-50-like_QKR36250.1_P.a.  | MRPLFSALLLL | SGHTQASEWNDSRAVDKLF | GGAAGVK | TFVLYDVQRQRYV | GHDRERA  |         |         |          |

OXA-50-like subfamily

[illegible]

4JF4 Beta-lactamase

*acc*

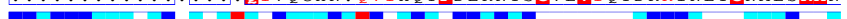



# OXA-50-like subfamily

|                             | 60     | 70   | 80     | 90        | 100    | 110   |
|-----------------------------|--------|------|--------|-----------|--------|-------|
|                             | η2     | α3   | TT     | η3        | α4     |       |
|                             | η2     | α3   | TT     | η3        | α4     |       |
| OXA-50-like_QQW22444.1.P.a. | TRFVPA | STYK | ANSLIG | STGAVRSAD | EVLPGG | KPQRF |
| OXA-50-like_QGQ00241.1.P.a. | TRFVPA | STYK | ANSLIG | STGAVRSAD | EVLPGG | KPQRF |
| OXA-50-like_QQW19268.1.P.a. | TRFVPA | STYK | ANSLIG | STGAVRSAD | EVLPGG | KPQRF |
| OXA-50-like_QQW06309.1.P.a. | TRFVPA | STYK | ANSLIG | STGAVRSAD | EVLPGG | KPQRF |
| OXA-50-like_QQV61463.1.P.a. | TRFVPA | STYK | ANSLIG | STGAVRSAD | EVLPGG | KPQRF |
| OXA-50-like_QPP39331.1.P.a. | TRFVPA | STYK | ANSLIG | STGAVRSAD | EVLPGG | KPQRF |
| OXA-50-like_QNE62162.1.P.a. | TRFVPA | STYK | ANSLIG | STGAVRSAD | EVLPGG | KPQRF |
| OXA-50-like_QLF44164.1.P.a. | TRFVPA | STYK | ANSLIG | STGAVRSAD | EVLPGG | KPQRF |
| OXA-50-like_QLF18710.1.P.a. | TRFVPA | STYK | ANSLIG | STGAVRSAD | EVLPGG | KPQRF |
| OXA-50-like_QEK46239.1.P.a. | TRFVPA | STYK | ANSLIG | STGAVRSAD | EVLPGG | KPQRF |
| OXA-50-like_QJA41232.1.P.a. | TRFVPA | STYK | ANSLIG | STGAVRSAD | EVLPGG | KPQRF |
| OXA-50-like_AYZ58090.1.P.a. | TRFVPA | STYK | ANSLIG | STGAVRSAD | EVLPGG | KPQRF |
| OXA-50-like_QDR20381.1.P.a. | TRFVPA | STYK | ANSLIG | STGAVRSAD | EVLPGG | KPQRF |
| OXA-50-like_AYW69566.1.P.a. | TRFVPA | STYK | ANSLIG | STGAVRSAD | EVLPGG | KPQRF |
| OXA-50-like_AYZ45913.1.P.a. | TRFVPA | STYK | ANSLIG | STGAVRSAD | EVLPGG | KPQRF |
| OXA-50-like_AYK26584.1.P.a. | TRFVPA | STYK | ANSLIG | STGAVRSAD | EVLPGG | KPQRF |
| OXA-50-like_ASM88695.1.P.a. | TRFVPA | STYK | ANSLIG | STGAVRSAD | EVLPGG | KPQRF |
| OXA-50-like_AUA80490.1.P.a. | TRFVPA | STYK | ANSLIG | STGAVRSAD | EVLPGG | KPQRF |
| OXA-50-like_AUB05120.1.P.a. | TRFVPA | STYK | ANSLIG | STGAVRSAD | EVLPGG | KPQRF |
| OXA-50-like_AVR86641.1.P.a. | TRFVPA | STYK | ANSLIG | STGAVRSAD | EVLPGG | KPQRF |
| OXA-50-like_AXS75147.1.P.a. | TRFVPA | STYK | ANSLIG | STGAVRSAD | EVLPGG | KPQRF |
| OXA-50-like_ALS13221.1.P.a. | TRFVPA | STYK | ANSLIG | STGAVRSAD | EVLPGG | KPQRF |
| OXA-50-like_ALY73377.1.P.a. | TRFVPA | STYK | ANSLIG | STGAVRSAD | EVLPGG | KPQRF |
| OXA-50-like_ANA70339.1.P.a. | TRFVPA | STYK | ANSLIG | STGAVRSAD | EVLPGG | KPQRF |
| OXA-50-like_APB68390.1.P.a. | TRFVPA | STYK | ANSLIG | STGAVRSAD | EVLPGG | KPQRF |
| OXA-50-like_ARI94830.1.P.a. | TRFVPA | STYK | ANSLIG | STGAVRSAD | EVLPGG | KPQRF |
| OXA-50-like_ARJ01367.1.P.a. | TRFVPA | STYK | ANSLIG | STGAVRSAD | EVLPGG | KPQRF |
| OXA-50-like_ASA19039.1.P.a. | TRFVPA | STYK | ANSLIG | STGAVRSAD | EVLPGG | KPQRF |
| OXA-50-like_AUA74232.1.P.a. | TRFVPA | STYK | ANSLIG | STGAVRSAD | EVLPGG | KPQRF |
| OXA-50-like_QCC69374.1.P.a. | TRFVPA | STYK | ANSLIG | STGAVRSAD | EVLPGG | KPQRF |
| OXA-50-like_ATH06157.1.P.a. | TRFVPA | STYK | ANSLIG | STGAVRSAD | EVLPGG | KPQRF |
| OXA-50-like_AZZ14888.1.P.a. | TRFVPA | STYK | ANSLIG | STGAVRSAD | EVLPGG | KPQRF |
| OXA-50-like_VDK95206.1.P.a. | TRFVPA | STYK | ANSLIG | STGAVRSAD | EVLPGG | KPQRF |
| OXA-50-like_VDL11569.1.P.a. | TRFVPA | STYK | ANSLIG | STGAVRSAD | EVLPGG | KPQRF |
| OXA-50-like_VDL54838.1.P.a. | TRFVPA | STYK | ANSLIG | STGAVRSAD | EVLPGG | KPQRF |
| OXA-50-like_VDL56340.1.P.a. | TRFVPA | STYK | ANSLIG | STGAVRSAD | EVLPGG | KPQRF |
| OXA-50-like_VDL57163.1.P.a. | TRFVPA | STYK | ANSLIG | STGAVRSAD | EVLPGG | KPQRF |
| OXA-50-like_ALZ29437.1.P.a. | TRFVPA | STYK | ANSLIG | STGAVRSAD | EVLPGG | KPQRF |
| OXA-50-like_AON10100.1.P.a. | TRFVPA | STYK | ANSLIG | STGAVRSAD | EVLPGG | KPQRF |
| OXA-50-like_AON16083.1.P.a. | TRFVPA | STYK | ANSLIG | STGAVRSAD | EVLPGG | KPQRF |
| OXA-50-like_AON22092.1.P.a. | TRFVPA | STYK | ANSLIG | STGAVRSAD | EVLPGG | KPQRF |
| OXA-50-like_AON28079.1.P.a. | TRFVPA | STYK | ANSLIG | STGAVRSAD | EVLPGG | KPQRF |
| OXA-50-like_AON34087.1.P.a. | TRFVPA | STYK | ANSLIG | STGAVRSAD | EVLPGG | KPQRF |
| OXA-50-like_AON40072.1.P.a. | TRFVPA | STYK | ANSLIG | STGAVRSAD | EVLPGG | KPQRF |
| OXA-50-like_AON46078.1.P.a. | TRFVPA | STYK | ANSLIG | STGAVRSAD | EVLPGG | KPQRF |
| OXA-50-like_AON52080.1.P.a. | TRFVPA | STYK | ANSLIG | STGAVRSAD | EVLPGG | KPQRF |
| OXA-50-like_ARG47835.1.P.a. | TRFVPA | STYK | ANSLIG | STGAVRSAD | EVLPGG | KPQRF |
| OXA-50-like_ASP05026.1.P.a. | TRFVPA | STYK | ANSLIG | STGAVRSAD | EVLPGG | KPQRF |
| OXA-50-like_ASP13070.1.P.a. | TRFVPA | STYK | ANSLIG | STGAVRSAD | EVLPGG | KPQRF |
| OXA-50-like_AVE36468.1.P.a. | TRFVPA | STYK | ANSLIG | STGAVRSAD | EVLPGG | KPQRF |
| OXA-50-like_AXL80491.1.P.a. | TRFVPA | STYK | ANSLIG | STGAVRSAD | EVLPGG | KPQRF |
| OXA-50-like_QDR05681.1.P.a. | TRFVPA | STYK | ANSLIG | STGAVRSAD | EVLPGG | KPQRF |
| OXA-50-like_QGJ36847.1.P.a. | TRFVPA | STYK | ANSLIG | STGAVRSAD | EVLPGG | KPQRF |
| OXA-50-like_QKG35875.1.P.a. | TRFVPA | STYK | ANSLIG | STGAVRSAD | EVLPGG | KPQRF |
| OXA-50-like_QKR24763.1.P.a. | TRFVPA | STYK | ANSLIG | STGAVRSAD | EVLPGG | KPQRF |
| OXA-50-like_QQO64022.1.P.a. | TRFVPA | STYK | ANSLIG | STGAVRSAD | EVLPGG | KPQRF |
| OXA-50-like_QQD36200.1.P.a. | TRFVPA | STYK | ANSLIG | STGAVRSAD | EVLPGG | KPQRF |
| OXA-50-like_AON75377.1.P.a. | TRFVPA | STYK | ANSLIG | STGAVRSAD | EVLPGG | KPQRF |
| OXA-50-like_QDY03768.1.P.a. | TRFVPA | STYK | ANSLIG | STGAVRSAD | EVLPGG | KPQRF |
| OXA-50-like_QPP46609.1.P.a. | TRFVPA | STYK | ANSLIG | STGAVRSAD | EVLPGG | KPQRF |
| OXA-50-like_QIZ29678.1.P.a. | TRFVPA | STYK | ANSLIG | STGAVRSAD | EVLPGG | KPQRF |
| OXA-50-like_QKR77815.1.P.a. | TRFVPA | STYK | ANSLIG | STGAVRSAD | EVLPGG | KPQRF |
| OXA-50-like_AMA40693.1.P.a. | TRFVPA | STYK | ANSLIG | STGAVRSAD | EVLPGG | KPQRF |
| OXA-50-like_QKE99620.1.P.a. | TRFVPA | STYK | ANSLIG | STGAVRSAD | EVLPGG | KPQRF |
| OXA-50-like_AVZ37799.1.P.a. | TRFVPA | STYK | ANSLIG | STGAVRSAD | EVLPGG | KPQRF |
| OXA-50-like_ASA32790.1.P.a. | TRFVPA | STYK | ANSLIG | STGAVRSAD | EVLPGG | KPQRF |
| OXA-50-like_ASD07216.1.P.a. | TRFVPA | STYK | ANSLIG | STGAVRSAD | EVLPGG | KPQRF |
| OXA-50-like_VDL31009.1.P.a. | TRFVPA | STYK | ANSLIG | STGAVRSAD | EVLPGG | KPQRF |
| OXA-50-like_VDL53067.1.P.a. | TRFVPA | STYK | ANSLIG | STGAVRSAD | EVLPGG | KPQRF |
| OXA-50-like_AYF72086.1.P.a. | TRFVPA | STYK | ANSLIG | STGAVRSAD | EVLPGG | KPQRF |
| OXA-50-like_AYQ83944.1.P.a. | TRFVPA | STYK | ANSLIG | STGAVRSAD | EVLPGG | KPQRF |
| OXA-50-like_AYR15974.1.P.a. | TRFVPA | STYK | ANSLIG | STGAVRSAD | EVLPGG | KPQRF |
| OXA-50-like_AZN03541.1.P.a. | TRFVPA | STYK | ANSLIG | STGAVRSAD | EVLPGG | KPQRF |
| OXA-50-like_AZN09267.1.P.a. | TRFVPA | STYK | ANSLIG | STGAVRSAD | EVLPGG | KPQRF |
| OXA-50-like_AZN16304.1.P.a. | TRFVPA | STYK | ANSLIG | STGAVRSAD | EVLPGG | KPQRF |
| OXA-50-like_AZN49449.1.P.a. | TRFVPA | STYK | ANSLIG | STGAVRSAD | EVLPGG | KPQRF |
| OXA-50-like_AZN54830.1.P.a. | TRFVPA | STYK | ANSLIG | STGAVRSAD | EVLPGG | KPQRF |
| OXA-50-like_AZN61319.1.P.a. | TRFVPA | STYK | ANSLIG | STGAVRSAD | EVLPGG | KPQRF |
| OXA-50-like_QPZ71933.1.P.a. | TRFVPA | STYK | ANSLIG | STGAVRSAD | EVLPGG | KPQRF |
| OXA-50-like_QQM09528.1.P.a. | TRFVPA | STYK | ANSLIG | STGAVRSAD | EVLPGG | KPQRF |
| OXA-50-like_AVN44779.1.P.a. | TRFVPA | STYK | ANSLIG | STGAVRSAD | EVLPGG | KPQRF |
| OXA-50-like_QKR65469.1.P.a. | TRFVPA | STYK | ANSLIG | STGAVRSAD | EVLPGG | KPQRF |
| OXA-50-like_AYW63307.1.P.a. | TRFVPA | STYK | ANSLIG | STGAVRSAD | EVLPGG | KPQRF |
| OXA-50-like_QPZ65977.1.P.a. | TRFVPA | STYK | ANSLIG | STGAVRSAD | EVLPGG | KPQRF |
| OXA-50-like_QHF92313.1.P.a. | TRFVPA | STYK | ANSLIG | STGAVRSAD | EVLPGG | KPQRF |
| OXA-50-like_AZM83163.1.P.a. | TRFVPA | STYK | ANSLIG | STGAVRSAD | EVLPGG | KPQRF |
| OXA-50-like_ALY58484.1.P.a. | TRFVPA | STYK | ANSLIG | STGAVRSAD | EVLPGG | KPQRF |
| OXA-50-like_AHA19368.1.P.a. | TRFVPA | STYK | ANSLIG | STGAVRSAD | EVLPGG | KPQRF |
| OXA-50-like_ALE51523.1.P.a. | TRFVPA | STYK | ANSLIG | STGAVRSAD | EVLPGG | KPQRF |
| OXA-50-like_ALY50692.1.P.a. | TRFVPA | STYK | ANSLIG | STGAVRSAD | EVLPGG | KPQRF |
| OXA-50-like_ALY86245.1.P.a. | TRFVPA | STYK | ANSLIG | STGAVRSAD | EVLPGG | KPQRF |
| OXA-50-like_ALZ22498.1.P.a. | TRFVPA | STYK | ANSLIG | STGAVRSAD | EVLPGG | KPQRF |
| OXA-50-like_AOP60986.1.P.a. | TRFVPA | STYK | ANSLIG | STGAVRSAD | EVLPGG | KPQRF |
| OXA-50-like_ASD00726.1.P.a. | TRFVPA | STYK | ANSLIG | STGAVRSAD | EVLPGG | KPQRF |
| OXA-50-like_AXR31931.1.P.a. | TRFVPA | STYK | ANSLIG | STGAVRSAD | EVLPGG | KPQRF |
| OXA-50-like_AYW76172.1.P.a. | TRFVPA | STYK | ANSLIG | STGAVRSAD | EVLPGG | KPQRF |
| OXA-50-like_QAS76324.1.P.a. | TRFVPA | STYK | ANSLIG | STGAVRSAD | EVLPGG | KPQRF |
| OXA-50-like_QDD38928.1.P.a. | TRFVPA | STYK | ANSLIG | STGAVRSAD | EVLPGG | KPQRF |
| OXA-50-like_QES85928.1.P.a. | TRFVPA | STYK | ANSLIG | STGAVRSAD | EVLPGG | KPQRF |
| OXA-50-like_QJH86618.1.P.a. | TRFVPA | STYK | ANSLIG | STGAVRSAD | EVLPGG | KPQRF |
| OXA-50-like_QKR88642.1.P.a. | TRFVPA | STYK | ANSLIG | STGAVRSAD | EVLPGG | KPQRF |
| OXA-50-like_QKR30875.1.P.a. | TRFVPA | STYK | ANSLIG | STGAVRSAD | EVLPGG | KPQRF |
| OXA-50-like_QKR36250.1.P.a. | TRFVPA | STYK | ANSLIG | STGAVRSAD | EVLPGG | KPQRF |

[illegible]

***acc***



[illegible]



OXA-50-like subfamily

OXA-50-like\_QK542441.1 P.a.  
OXA-50-like\_QPP27676.1 P.a.  
OXA-50-like\_QPV54155.1 P.a.  
OXA-50-like\_QPZ84995.1 P.a.  
OXA-50-like\_ANP59968.1 P.a.  
OXA-50-like\_QGQ06905.1 P.a.  
OXA-50-like\_AXR14368.1 P.a.  
OXA-50-like\_ALP57413.1 P.a.  
OXA-50-like\_QKR41777.1 P.a.  
OXA-50-like\_ALY36156.1 P.a.  
OXA-50-like\_ALY52550.1 P.a.  
OXA-50-like\_ANT07822.1 P.a.  
OXA-50-like\_AWS88163.1 P.a.  
OXA-50-like\_AXM29478.1 P.a.  
OXA-50-like\_QCB08854.1 P.a.  
OXA-50-like\_QDD49249.1 P.a.  
OXA-50-like\_QDR11871.1 P.a.  
OXA-50-like\_QKP84324.1 P.a.  
OXA-50-like\_QKR71283.1 P.a.  
OXA-50-like\_QLA53973.1 P.a.  
OXA-50-like\_QLD71620.1 P.a.  
OXA-50-like\_QLD73935.1 P.a.  
OXA-50-like\_QLD78684.1 P.a.  
OXA-50-like\_QLF37576.1 P.a.  
OXA-50-like\_AWT32452.1 P.a.  
OXA-50-like\_AXZ92060.1 P.a.  
OXA-50-like\_QIT197759.1 P.a.  
OXA-50-like\_QOB13519.1 P.a.  
OXA-50-like\_QPN23057.1 P.a.  
OXA-50-like\_QDR14302.1 P.a.  
OXA-50-like\_ALZ16475.1 P.a.  
OXA-50-like\_QKF04533.1 P.a.  
OXA-50-like\_QNO22317.1 P.a.  
OXA-50-like\_QQW12925.1 P.a.  
OXA-50-like\_AY281447.1 P.a.  
OXA-50-like\_QK116662.1 P.a.  
OXA-50-like\_QQW00026.1 P.a.  
OXA-50-like\_ALV75159.1 P.a.  
OXA-50-like\_ALY89963.1 P.a.  
OXA-50-like\_ALY96872.1 P.a.  
OXA-50-like\_AMX88486.1 P.a.  
OXA-50-like\_ARC82831.1 P.a.  
OXA-50-like\_ASD14027.1 P.a.  
OXA-50-like\_AY275988.1 P.a.  
OXA-50-like\_QF261919.1 P.a.  
OXA-50-like\_QKF90385.1 P.a.  
OXA-50-like\_QKR47436.1 P.a.  
OXA-50-like\_QKR53224.1 P.a.  
OXA-50-like\_QKR59118.1 P.a.  
OXA-50-like\_QLF25267.1 P.a.  
OXA-50-like\_QPP21637.1 P.a.  
OXA-50-like\_QQA85373.1 P.a.  
OXA-50-like\_QRG72678.1 P.a.  
OXA-50-like\_AYY40220.1 P.a.  
OXA-50-like\_ALZ28576.1 P.a.  
OXA-50-like\_QNQ04301.1 P.a.  
OXA-50-like\_ALZ94285.1 P.a.  
OXA-50-like\_AMU04106.1 P.a.  
OXA-50-like\_AOT37986.1 P.a.  
OXA-50-like\_ASD20357.1 P.a.  
OXA-50-like\_AVZ22774.1 P.a.  
OXA-50-like\_AXC20842.1 P.a.  
OXA-50-like\_AYN84711.1 P.a.  
OXA-50-like\_CRZ33166.1 P.a.  
OXA-50-like\_QBF65101.1 P.a.  
OXA-50-like\_QEF81401.1 P.a.  
OXA-50-like\_QEF87414.1 P.a.  
OXA-50-like\_QEF93418.1 P.a.  
OXA-50-like\_QGM44151.1 P.a.  
OXA-50-like\_QHT63098.1 P.a.  
OXA-50-like\_QIB85902.1 P.a.  
OXA-50-like\_QKR06746.1 P.a.  
OXA-50-like\_QKR13035.1 P.a.  
OXA-50-like\_QKR18855.1 P.a.  
OXA-50-like\_QKR83750.1 P.a.  
OXA-50-like\_QLF31591.1 P.a.  
OXA-50-like\_VDL04843.1 P.a.  
OXA-50-like\_QCP80115.1 P.a.  
OXA-50-like\_QEK88934.1 P.a.  
OXA-50-like\_ALU47404.1 P.a.  
OXA-50-like\_APC75958.1 P.a.  
OXA-50-like\_QPZ59753.1 P.a.  
OXA-50-like\_QFZ03142.1 P.a.  
OXA-50-like\_QGG01915.1 P.a.  
OXA-50-like\_AUA86524.1 P.a.  
OXA-50-like\_AUA92615.1 P.a.  
4JF4 Beta-lactamase

***acc***

## OXA-50-like subfamily

|                             | 180      | 190    | 200    | 210    | 220  | 230    |
|-----------------------------|----------|--------|--------|--------|------|--------|
|                             | α8       | β3     | β4     | β5     | β6   | β7     |
|                             | α8       | β3     | β4     | β5     | β6   | β7     |
| OXA-50-like_QQW22444.1_P.a. | PAPVQSTV | RAMTLL | ESGPGW | ELHGGT | GCFC | DTPELG |
| OXA-50-like_QGQ00241.1_P.a. | PAPVQSTV | RAMTLL | ESGPGW | ELHGGT | GCFC | DTPELG |
| OXA-50-like_QQW19268.1_P.a. | PAPVQSTV | RAMTLL | ESGPGW | ELHGGT | GCFC | DTPELG |
| OXA-50-like_QQW06309.1_P.a. | PAPVQSTV | RAMTLL | ESGPGW | ELHGGT | GCFC | DTPELG |
| OXA-50-like_QQV61463.1_P.a. | PAPVQSTV | RAMTLL | ESGPGW | ELHGGT | GCFC | DTPELG |
| OXA-50-like_QPP39331.1_P.a. | PAPVQSTV | RAMTLL | ESGPGW | ELHGGT | GCFC | DTPELG |
| OXA-50-like_QNE62162.1_P.a. | PAPVQSTV | RAMTLL | ESGPGW | ELHGGT | GCFC | DTPELG |
| OXA-50-like_QLF44164.1_P.a. | PAPVQSTV | RAMTLL | ESGPGW | ELHGGT | GCFC | DTPELG |
| OXA-50-like_QLF18710.1_P.a. | PAPVQSTV | RAMTLL | ESGPGW | ELHGGT | GCFC | DTPELG |
| OXA-50-like_QEK46239.1_P.a. | PAPVQSTV | RAMTLL | ESGPGW | ELHGGT | GCFC | DTPELG |
| OXA-50-like_QJA1232.1_P.a.  | PAPVQSTV | RAMTLL | ESGPGW | ELHGGT | GCFC | DTPELG |
| OXA-50-like_AYZ58090.1_P.a. | PAPVQSTV | RAMTLL | ESGPGW | ELHGGT | GCFC | DTPELG |
| OXA-50-like_QDR20381.1_P.a. | PAPVQSTV | RAMTLL | ESGPGW | ELHGGT | GCFC | DTPELG |
| OXA-50-like_AYW69566.1_P.a. | PAPVQSTV | RAMTLL | ESGPGW | ELHGGT | GCFC | DTPELG |
| OXA-50-like_AYZ45913.1_P.a. | PAPVQSTV | RAMTLL | ESGPGW | ELHGGT | GCFC | DTPELG |
| OXA-50-like_AYK26584.1_P.a. | PAPVQSTV | RAMTLL | ESGPGW | ELHGGT | GCFC | DTPELG |
| OXA-50-like_ASM88695.1_P.a. | PAPVQSTV | RAMTLL | ESGPGW | ELHGGT | GCFC | DTPELG |
| OXA-50-like_AUA80490.1_P.a. | PAPVQSTV | RAMTLL | ESGPGW | ELHGGT | GCFC | DTPELG |
| OXA-50-like_AUB05120.1_P.a. | PAPVQSTV | RAMTLL | ESGPGW | ELHGGT | GCFC | DTPELG |
| OXA-50-like_AVR86641.1_P.a. | PAPVQSTV | RAMTLL | ESGPGW | ELHGGT | GCFC | DTPELG |
| OXA-50-like_AXS75147.1_P.a. | PAPVQSTV | RAMTLL | ESGPGW | ELHGGT | GCFC | DTPELG |
| OXA-50-like_ALS13221.1_P.a. | PAPVQSTV | RAMTLL | ESGPGW | ELHGGT | GCFC | DTPELG |
| OXA-50-like_ALY73377.1_P.a. | PAPVQSTV | RAMTLL | ESGPGW | ELHGGT | GCFC | DTPELG |
| OXA-50-like_ANA70339.1_P.a. | PAPVQSTV | RAMTLL | ESGPGW | ELHGGT | GCFC | DTPELG |
| OXA-50-like_APB68390.1_P.a. | PAPVQSTV | RAMTLL | ESGPGW | ELHGGT | GCFC | DTPELG |
| OXA-50-like_ARI94830.1_P.a. | PAPVQSTV | RAMTLL | ESGPGW | ELHGGT | GCFC | DTPELG |
| OXA-50-like_ARJ01367.1_P.a. | PAPVQSTV | RAMTLL | ESGPGW | ELHGGT | GCFC | DTPELG |
| OXA-50-like_ASA19039.1_P.a. | PAPVQSTV | RAMTLL | ESGPGW | ELHGGT | GCFC | DTPELG |
| OXA-50-like_AUA74232.1_P.a. | PAPVQSTV | RAMTLL | ESGPGW | ELHGGT | GCFC | DTPELG |
| OXA-50-like_QCC69374.1_P.a. | PAPVQSTV | RAMTLL | ESGPGW | ELHGGT | GCFC | DTPELG |
| OXA-50-like_ATH06157.1_P.a. | PAPVQSTV | RAMTLL | ESGPGW | ELHGGT | GCFC | DTPELG |
| OXA-50-like_AZZ14888.1_P.a. | PAPVQSTV | RAMTLL | ESGPGW | ELHGGT | GCFC | DTPELG |
| OXA-50-like_VDK95206.1_P.a. | PAPVQSTV | RAMTLL | ESGPGW | ELHGGT | GCFC | DTPELG |
| OXA-50-like_VDL11569.1_P.a. | PAPVQSTV | RAMTLL | ESGPGW | ELHGGT | GCFC | DTPELG |
| OXA-50-like_VDL54838.1_P.a. | PAPVQSTV | RAMTLL | ESGPGW | ELHGGT | GCFC | DTPELG |
| OXA-50-like_VDL56340.1_P.a. | PAPVQSTV | RAMTLL | ESGPGW | ELHGGT | GCFC | DTPELG |
| OXA-50-like_VDL57163.1_P.a. | PAPVQSTV | RAMTLL | ESGPGW | ELHGGT | GCFC | DTPELG |
| OXA-50-like_ALZ29437.1_P.a. | PAPVQSTV | RAMTLL | ESGPGW | ELHGGT | GCFC | DTPELG |
| OXA-50-like_AON10100.1_P.a. | PAPVQSTV | RAMTLL | ESGPGW | ELHGGT | GCFC | DTPELG |
| OXA-50-like_AON16083.1_P.a. | PAPVQSTV | RAMTLL | ESGPGW | ELHGGT | GCFC | DTPELG |
| OXA-50-like_AON22092.1_P.a. | PAPVQSTV | RAMTLL | ESGPGW | ELHGGT | GCFC | DTPELG |
| OXA-50-like_AON28079.1_P.a. | PAPVQSTV | RAMTLL | ESGPGW | ELHGGT | GCFC | DTPELG |
| OXA-50-like_AON34087.1_P.a. | PAPVQSTV | RAMTLL | ESGPGW | ELHGGT | GCFC | DTPELG |
| OXA-50-like_AON40072.1_P.a. | PAPVQSTV | RAMTLL | ESGPGW | ELHGGT | GCFC | DTPELG |
| OXA-50-like_AON46078.1_P.a. | PAPVQSTV | RAMTLL | ESGPGW | ELHGGT | GCFC | DTPELG |
| OXA-50-like_AON52080.1_P.a. | PAPVQSTV | RAMTLL | ESGPGW | ELHGGT | GCFC | DTPELG |
| OXA-50-like_ARG47835.1_P.a. | PAPVQSTV | RAMTLL | ESGPGW | ELHGGT | GCFC | DTPELG |
| OXA-50-like_ASP05026.1_P.a. | PAPVQSTV | RAMTLL | ESGPGW | ELHGGT | GCFC | DTPELG |
| OXA-50-like_ASP13070.1_P.a. | PAPVQSTV | RAMTLL | ESGPGW | ELHGGT | GCFC | DTPELG |
| OXA-50-like_AVE36468.1_P.a. | PAPVQSTV | RAMTLL | ESGPGW | ELHGGT | GCFC | DTPELG |
| OXA-50-like_AXL80491.1_P.a. | PAPVQSTV | RAMTLL | ESGPGW | ELHGGT | GCFC | DTPELG |
| OXA-50-like_QDR05681.1_P.a. | PAPVQSTV | RAMTLL | ESGPGW | ELHGGT | GCFC | DTPELG |
| OXA-50-like_QGJ36847.1_P.a. | PAPVQSTV | RAMTLL | ESGPGW | ELHGGT | GCFC | DTPELG |
| OXA-50-like_QRG35875.1_P.a. | PAPVQSTV | RAMTLL | ESGPGW | ELHGGT | GCFC | DTPELG |
| OXA-50-like_QXR24763.1_P.a. | PAPVQSTV | RAMTLL | ESGPGW | ELHGGT | GCFC | DTPELG |
| OXA-50-like_QQO64022.1_P.a. | PAPVQSTV | RAMTLL | ESGPGW | ELHGGT | GCFC | DTPELG |
| OXA-50-like_QQD36200.1_P.a. | PAPVQSTV | RAMTLL | ESGPGW | ELHGGT | GCFC | DTPELG |
| OXA-50-like_AON75377.1_P.a. | PAPVQSTV | RAMTLL | ESGPGW | ELHGGT | GCFC | DTPELG |
| OXA-50-like_QDY03768.1_P.a. | PAPVQSTV | RAMTLL | ESGPGW | ELHGGT | GCFC | DTPELG |
| OXA-50-like_QPP46609.1_P.a. | PAPVQSTV | RAMTLL | ESGPGW | ELHGGT | GCFC | DTPELG |
| OXA-50-like_QTZ29678.1_P.a. | PAPVQSTV | RAMTLL | ESGPGW | ELHGGT | GCFC | DTPELG |
| OXA-50-like_QXR77815.1_P.a. | PAPVQSTV | RAMTLL | ESGPGW | ELHGGT | GCFC | DTPELG |
| OXA-50-like_AMA40693.1_P.a. | PAPVQSTV | RAMTLL | ESGPGW | ELHGGT | GCFC | DTPELG |
| OXA-50-like_QKE99620.1_P.a. | PAPVQSTV | RAMTLL | ESGPGW | ELHGGT | GCFC | DTPELG |
| OXA-50-like_AYV37799.1_P.a. | PAPVQSTV | RAMTLL | ESGPGW | ELHGGT | GCFC | DTPELG |
| OXA-50-like_ASA32790.1_P.a. | PAPVQSTV | RAMTLL | ESGPGW | ELHGGT | GCFC | DTPELG |
| OXA-50-like_ASD07216.1_P.a. | PAPVQSTV | RAMTLL | ESGPGW | ELHGGT | GCFC | DTPELG |
| OXA-50-like_VDL31009.1_P.a. | PAPVQSTV | RAMTLL | ESGPGW | ELHGGT | GCFC | DTPELG |
| OXA-50-like_VDL53067.1_P.a. | PAPVQSTV | RAMTLL | ESGPGW | ELHGGT | GCFC | DTPELG |
| OXA-50-like_AYF72086.1_P.a. | PAPVQSTV | RAMTLL | ESGPGW | ELHGGT | GCFC | DTPELG |
| OXA-50-like_AYQ83944.1_P.a. | PAPVQSTV | RAMTLL | ESGPGW | ELHGGT | GCFC | DTPELG |
| OXA-50-like_AYR15974.1_P.a. | PAPVQSTV | RAMTLL | ESGPGW | ELHGGT | GCFC | DTPELG |
| OXA-50-like_AZN03541.1_P.a. | PAPVQSTV | RAMTLL | ESGPGW | ELHGGT | GCFC | DTPELG |
| OXA-50-like_AZN09267.1_P.a. | PAPVQSTV | RAMTLL | ESGPGW | ELHGGT | GCFC | DTPELG |
| OXA-50-like_AZN16304.1_P.a. | PAPVQSTV | RAMTLL | ESGPGW | ELHGGT | GCFC | DTPELG |
| OXA-50-like_AZN49449.1_P.a. | PAPVQSTV | RAMTLL | ESGPGW | ELHGGT | GCFC | DTPELG |
| OXA-50-like_AZN54830.1_P.a. | PAPVQSTV | RAMTLL | ESGPGW | ELHGGT | GCFC | DTPELG |
| OXA-50-like_AZN61319.1_P.a. | PAPVQSTV | RAMTLL | ESGPGW | ELHGGT | GCFC | DTPELG |
| OXA-50-like_QPZ71933.1_P.a. | PAPVQSTV | RAMTLL | ESGPGW | ELHGGT | GCFC | DTPELG |
| OXA-50-like_QQM09528.1_P.a. | PAPVQSTV | RAMTLL | ESGPGW | ELHGGT | GCFC | DTPELG |
| OXA-50-like_AVN44779.1_P.a. | PAPVQSTV | RAMTLL | ESGPGW | ELHGGT | GCFC | DTPELG |
| OXA-50-like_QKR65469.1_P.a. | PAPVQSTV | RAMTLL | ESGPGW | ELHGGT | GCFC | DTPELG |
| OXA-50-like_AYW63307.1_P.a. | PAPVQSTV | RAMTLL | ESGPGW | ELHGGT | GCFC | DTPELG |
| OXA-50-like_QPZ65977.1_P.a. | PAPVQSTV | RAMTLL | ESGPGW | ELHGGT | GCFC | DTPELG |
| OXA-50-like_QHF92313.1_P.a. | PAPVQSTV | RAMTLL | ESGPGW | ELHGGT | GCFC | DTPELG |
| OXA-50-like_AZM83163.1_P.a. | PAPVQSTV | RAMTLL | ESGPGW | ELHGGT | GCFC | DTPELG |
| OXA-50-like_ALY58484.1_P.a. | PAPVQSTV | RAMTLL | ESGPGW | ELHGGT | GCFC | DTPELG |
| OXA-50-like_AHA19368.1_P.a. | PAPVQSTV | RAMTLL | ESGPGW | ELHGGT | GCFC | DTPELG |
| OXA-50-like_ALE51523.1_P.a. | PAPVQSTV | RAMTLL | ESGPGW | ELHGGT | GCFC | DTPELG |
| OXA-50-like_ALY50692.1_P.a. | PAPVQSTV | RAMTLL | ESGPGW | ELHGGT | GCFC | DTPELG |
| OXA-50-like_ALY86245.1_P.a. | PAPVQSTV | RAMTLL | ESGPGW | ELHGGT | GCFC | DTPELG |
| OXA-50-like_ALZ22498.1_P.a. | PAPVQSTV | RAMTLL | ESGPGW | ELHGGT | GCFC | DTPELG |
| OXA-50-like_AOP60986.1_P.a. | PAPVQSTV | RAMTLL | ESGPGW | ELHGGT | GCFC | DTPELG |
| OXA-50-like_ASD00726.1_P.a. | PAPVQSTV | RAMTLL | ESGPGW | ELHGGT | GCFC | DTPELG |
| OXA-50-like_AXR31931.1_P.a. | PAPVQSTV | RAMTLL | ESGPGW | ELHGGT | GCFC | DTPELG |
| OXA-50-like_AYW76172.1_P.a. | PAPVQSTV | RAMTLL | ESGPGW | ELHGGT | GCFC | DTPELG |
| OXA-50-like_QAS76324.1_P.a. | PAPVQSTV | RAMTLL | ESGPGW | ELHGGT | GCFC | DTPELG |
| OXA-50-like_QDD38928.1_P.a. | PAPVQSTV | RAMTLL | ESGPGW | ELHGGT | GCFC | DTPELG |
| OXA-50-like_QES85928.1_P.a. | PAPVQSTV | RAMTLL | ESGPGW | ELHGGT | GCFC | DTPELG |
| OXA-50-like_QJH86618.1_P.a. | PAPVQSTV | RAMTLL | ESGPGW | ELHGGT | GCFC | DTPELG |
| OXA-50-like_QKR88642.1_P.a. | PAPVQSTV | RAMTLL | ESGPGW | ELHGGT | GCFC | DTPELG |
| OXA-50-like_QKR30875.1_P.a. | PAPVQSTV | RAMTLL | ESGPGW | ELHGGT | GCFC | DTPELG |
| OXA-50-like_QKR36250.1_P.a. | PAPVQSTV | RAMTLL | ESGPGW | ELHGGT | GCFC | DTPELG |



KT

4JF4\_Beta-lactamase

acc

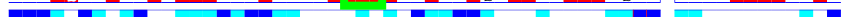



## OXA-50-like subfamily

|                             |                  |            |         |
|-----------------------------|------------------|------------|---------|
|                             |                  | $\alpha 9$ |         |
|                             | 0000000000000000 |            |         |
| 240                         | 250              | 260        |         |
| OXA-50-like_QQW22444.1_P.a. | GGEADIGKRV       | ELGKASL    | KALGILP |
| OXA-50-like_QGQ00241.1_P.a. | GGEADIGKRV       | ELGKASL    | KALGILP |
| OXA-50-like_QQW19268.1_P.a. | GGEADIGKRV       | ELGKASL    | KALGILP |
| OXA-50-like_QQW06309.1_P.a. | GGEADIGKRV       | ELGKASL    | KALGILP |
| OXA-50-like_QQV61463.1_P.a. | GGEADIGKRV       | ELGKASL    | KALGILP |
| OXA-50-like_QPP39331.1_P.a. | GGEADIGKRV       | ELGKASL    | KALGILP |
| OXA-50-like_QNE62162.1_P.a. | GGEADIGKRV       | ELGKASL    | KALGILP |
| OXA-50-like_QLF44164.1_P.a. | GGEADIGKRV       | ELGKASL    | KALGILP |
| OXA-50-like_QLF18710.1_P.a. | GGEADIGKRV       | ELGKASL    | KALGILP |
| OXA-50-like_QEK46239.1_P.a. | GGEADIGKRV       | ELGKASL    | KALGILP |
| OXA-50-like_QJA41232.1_P.a. | GGEADIGKRV       | ELGKASL    | KALGILP |
| OXA-50-like_AYZ58090.1_P.a. | GGEADIGKRV       | ELGKASL    | KALGILP |
| OXA-50-like_QDR20381.1_P.a. | GGEADIGKRV       | ELGKASL    | KALGILP |
| OXA-50-like_AYW69566.1_P.a. | GGEADIGKRV       | ELGKASL    | KALGILP |
| OXA-50-like_AYZ45913.1_P.a. | GGEADIGKRV       | ELGKASL    | KALGILP |
| OXA-50-like_AYK26584.1_P.a. | GGEADIGKRV       | ELGKASL    | KALGILP |
| OXA-50-like_ASM88695.1_P.a. | GGEADIGKRV       | ELGKASL    | KALGILP |
| OXA-50-like_AUA80490.1_P.a. | GGEADIGKRV       | ELGKASL    | KALGILP |
| OXA-50-like_AUB05120.1_P.a. | GGEADIGKRV       | ELGKASL    | KALGILP |
| OXA-50-like_AVR86641.1_P.a. | GGEADIGKRV       | ELGKASL    | KALGILP |
| OXA-50-like_AXS75147.1_P.a. | GGEADIGKRV       | ELGKASL    | KALGILP |
| OXA-50-like_ALS13221.1_P.a. | GGEADIGKRV       | ELGKASL    | KALGILP |
| OXA-50-like_ALY73377.1_P.a. | GGEADIGKRV       | ELGKASL    | KALGILP |
| OXA-50-like_ANA70339.1_P.a. | GGEADIGKRV       | ELGKASL    | KALGILP |
| OXA-50-like_APB68390.1_P.a. | GGEADIGKRV       | ELGKASL    | KALGILP |
| OXA-50-like_ARI94830.1_P.a. | GGEADIGKRV       | ELGKASL    | KALGILP |
| OXA-50-like_ARJ01367.1_P.a. | GGEADIGKRV       | ELGKASL    | KALGILP |
| OXA-50-like_ASA19039.1_P.a. | GGEADIGKRV       | ELGKASL    | KALGILP |
| OXA-50-like_AUA74232.1_P.a. | GGEADIGKRV       | ELGKASL    | KALGILP |
| OXA-50-like_QCC69374.1_P.a. | GGEADIGKRV       | ELGKASL    | KALGILP |
| OXA-50-like_ATH06157.1_P.a. | GGEADIGKRV       | ELGKASL    | KALGILP |
| OXA-50-like_AZZ14888.1_P.a. | GGEADIGKRV       | ELGKASL    | KALGILP |
| OXA-50-like_VDK95206.1_P.a. | GGEADIGKRV       | ELGKASL    | KALGILP |
| OXA-50-like_VDL11569.1_P.a. | GGEADIGKRV       | ELGKASL    | KALGILP |
| OXA-50-like_VDL54838.1_P.a. | GGEADIGKRV       | ELGKASL    | KALGILP |
| OXA-50-like_VDL56340.1_P.a. | GGEADIGKRV       | ELGKASL    | KALGILP |
| OXA-50-like_VDL57163.1_P.a. | GGEADIGKRV       | ELGKASL    | KALGILP |
| OXA-50-like_ALZ29437.1_P.a. | GGEADIGKRV       | ELGKASL    | KALGILP |
| OXA-50-like_AON10100.1_P.a. | GGEADIGKRV       | ELGKASL    | KALGILP |
| OXA-50-like_AON16083.1_P.a. | GGEADIGKRV       | ELGKASL    | KALGILP |
| OXA-50-like_AON22092.1_P.a. | GGEADIGKRV       | ELGKASL    | KALGILP |
| OXA-50-like_AON28079.1_P.a. | GGEADIGKRV       | ELGKASL    | KALGILP |
| OXA-50-like_AON34087.1_P.a. | GGEADIGKRV       | ELGKASL    | KALGILP |
| OXA-50-like_AON40072.1_P.a. | GGEADIGKRV       | ELGKASL    | KALGILP |
| OXA-50-like_AON46078.1_P.a. | GGEADIGKRV       | ELGKASL    | KALGILP |
| OXA-50-like_AON52080.1_P.a. | GGEADIGKRV       | ELGKASL    | KALGILP |
| OXA-50-like_ARG47835.1_P.a. | GGEADIGKRV       | ELGKASL    | KALGILP |
| OXA-50-like_ASP05026.1_P.a. | GGEADIGKRV       | ELGKASL    | KALGILP |
| OXA-50-like_ASP13070.1_P.a. | GGEADIGKRV       | ELGKASL    | KALGILP |
| OXA-50-like_AVE36468.1_P.a. | GGEADIGKRV       | ELGKASL    | KALGILP |
| OXA-50-like_AXL80491.1_P.a. | GGEADIGKRV       | ELGKASL    | KALGILP |
| OXA-50-like_QDR05681.1_P.a. | GGEADIGKRV       | ELGKASL    | KALGILP |
| OXA-50-like_QGJ36847.1_P.a. | GGEADIGKRV       | ELGKASL    | KALGILP |
| OXA-50-like_QKG35875.1_P.a. | GGEADIGKRV       | ELGKASL    | KALGILP |
| OXA-50-like_QXR24763.1_P.a. | GGEADIGKRV       | ELGKASL    | KALGILP |
| OXA-50-like_QOQ64022.1_P.a. | GGEADIGKRV       | ELGKASL    | KALGILP |
| OXA-50-like_QQD36200.1_P.a. | GGEADIGKRV       | ELGKASL    | KALGILP |
| OXA-50-like_AON75377.1_P.a. | GGEADIGKRV       | ELGKASL    | KALGILP |
| OXA-50-like_QDY03768.1_P.a. | GGEADIGKRV       | ELGKASL    | KALGILP |
| OXA-50-like_QPP46609.1_P.a. | GGEADIGKRV       | ELGKASL    | KALGILP |
| OXA-50-like_QTZ29678.1_P.a. | GGEADIGKRV       | ELGKASL    | KALGILP |
| OXA-50-like_QKR77815.1_P.a. | GGEADIGKRV       | ELGKASL    | KALGILP |
| OXA-50-like_AMA40693.1_P.a. | GGEADIGKRV       | ELGKASL    | KALGILP |
| OXA-50-like_QKE99620.1_P.a. | GGEADIGKRV       | ELGKASL    | KALGILP |
| OXA-50-like_AVZ37799.1_P.a. | GGEADIGKRV       | ELGKASL    | KALGILP |
| OXA-50-like_ASA32790.1_P.a. | GGEADIGKRV       | ELGKASL    | KALGILP |
| OXA-50-like_ASD07216.1_P.a. | GGEADIGKRV       | ELGKASL    | KALGILP |
| OXA-50-like_VDL31009.1_P.a. | GGEADIGKRV       | ELGKASL    | KALGILP |
| OXA-50-like_VDL53067.1_P.a. | GGEADIGKRV       | ELGKASL    | KALGILP |
| OXA-50-like_AYF72086.1_P.a. | GGEADIGKRV       | ELGKASL    | KALGILP |
| OXA-50-like_AYQ83944.1_P.a. | GGEADIGKRV       | ELGKASL    | KALGILP |
| OXA-50-like_AYR15974.1_P.a. | GGEADIGKRV       | ELGKASL    | KALGILP |
| OXA-50-like_AZN03541.1_P.a. | GGEADIGKRV       | ELGKASL    | KALGILP |
| OXA-50-like_AZN09267.1_P.a. | GGEADIGKRV       | ELGKASL    | KALGILP |
| OXA-50-like_AZN16304.1_P.a. | GGEADIGKRV       | ELGKASL    | KALGILP |
| OXA-50-like_AZN49449.1_P.a. | GGEADIGKRV       | ELGKASL    | KALGILP |
| OXA-50-like_AZN54830.1_P.a. | GGEADIGKRV       | ELGKASL    | KALGILP |
| OXA-50-like_AZN61319.1_P.a. | GGEADIGKRV       | ELGKASL    | KALGILP |
| OXA-50-like_QPZ71933.1_P.a. | GGEADIGKRV       | ELGKASL    | KALGILP |
| OXA-50-like_QQM09528.1_P.a. | GGEADIGKRV       | ELGKASL    | KALGILP |
| OXA-50-like_AVN44779.1_P.a. | GGEADIGKRV       | ELGKASL    | KALGILP |
| OXA-50-like_QKR65469.1_P.a. | GGEADIGKRV       | ELGKASL    | KALGILP |
| OXA-50-like_AYW63307.1_P.a. | GGEADIGKRV       | ELGKASL    | KALGILP |
| OXA-50-like_QPZ65977.1_P.a. | GGEADIGKRV       | ELGKASL    | KALGILP |
| OXA-50-like_QHF92313.1_P.a. | GGEADIGKRV       | ELGKASL    | KALGILP |
| OXA-50-like_AZM83163.1_P.a. | GGEADIGKRV       | ELGKASL    | KALGILP |
| OXA-50-like_ALY58484.1_P.a. | GGEADIGKRV       | ELGKASL    | KALGILP |
| OXA-50-like_AHA19368.1_P.a. | GGEADIGKRV       | ELGKASL    | KALGILP |
| OXA-50-like_ALE51523.1_P.a. | GGEADIGKRV       | ELGKASL    | KALGILP |
| OXA-50-like_ALY50692.1_P.a. | GGEADIGKRV       | ELGKASL    | KALGILP |
| OXA-50-like_ALY86245.1_P.a. | GGEADIGKRV       | ELGKASL    | KALGILP |
| OXA-50-like_ALZ22498.1_P.a. | GGEADIGKRV       | ELGKASL    | KALGILP |
| OXA-50-like_AOP60986.1_P.a. | GGEADIGKRV       | ELGKASL    | KALGILP |
| OXA-50-like_ASD00726.1_P.a. | GGEADIGKRV       | ELGKASL    | KALGILP |
| OXA-50-like_AXR31931.1_P.a. | GGEADIGKRV       | ELGKASL    | KALGILP |
| OXA-50-like_AYW76172.1_P.a. | GGEADIGKRV       | ELGKASL    | KALGILP |
| OXA-50-like_QAS76324.1_P.a. | GGEADIGKRV       | ELGKASL    | KALGILP |
| OXA-50-like_QDD38928.1_P.a. | GGEADIGKRV       | ELGKASL    | KALGILP |
| OXA-50-like_QES85928.1_P.a. | GGEADIGKRV       | ELGKASL    | KALGILP |
| OXA-50-like_QJH86618.1_P.a. | GGEADIGKRV       | ELGKASL    | KALGILP |
| OXA-50-like_QKK88642.1_P.a. | GGEADIGKRV       | ELGKASL    | KALGILP |
| OXA-50-like_QKR30875.1_P.a. | GGEADIGKRV       | ELGKASL    | KALGILP |
| OXA-50-like_QKR36250.1_P.a. | GGEADIGKRV       | ELGKASL    | KALGILP |

# OXA-50-like subfamily

OXA-50-like\_QKS42441.1 P.a. GGEADIGKRVELGKASLKALGILP  
OXA-50-like\_QPP27676.1 P.a. GGEADIGKRVELGKASLKALGILP  
OXA-50-like\_QPV54155.1 P.a. GGEADIGKRVELGKASLKALGILP  
OXA-50-like\_QPZ84995.1 P.a. GGEADIGKRVELGKASLKALGILP  
OXA-50-like\_ANP59968.1 P.a. GGEADIGKRVELGKASLKALGILP  
OXA-50-like\_QQ06905.1 P.a. GGEADIGKRVELGKASLKALGILP  
OXA-50-like\_AXR14368.1 P.a. GGEADIGKRVELGKASLKALGILP  
OXA-50-like\_ALP57413.1 P.a. GGEADIGKRVELGKASLKALGILP  
OXA-50-like\_QKR41777.1 P.a. GGEADIGKRVELGKASLKALGILP  
OXA-50-like\_ALY36156.1 P.a. GGEADIGKRVELGKASLKALGILP  
OXA-50-like\_ALY52550.1 P.a. GGEADIGKRVELGKASLKALGILP  
OXA-50-like\_ANI07822.1 P.a. GGEADIGKRVELGKASLKALGILP  
OXA-50-like\_AWS88163.1 P.a. GGEADIGKRVELGKASLKALGILP  
OXA-50-like\_AXN29478.1 P.a. GGEADIGKRVELGKASLKALGILP  
OXA-50-like\_QBC08854.1 P.a. GGEADIGKRVELGKASLKALGILP  
OXA-50-like\_QDD49249.1 P.a. GGEADIGKRVELGKASLKALGILP  
OXA-50-like\_QDR11871.1 P.a. GGEADIGKRVELGKASLKALGILP  
OXA-50-like\_QRP84324.1 P.a. GGEADIGKRVELGKASLKALGILP  
OXA-50-like\_QKR71283.1 P.a. GGEADIGKRVELGKASLKALGILP  
OXA-50-like\_QLA53973.1 P.a. GGEADIGKRVELGKASLKALGILP  
OXA-50-like\_QLD71620.1 P.a. GGEADIGKRVELGKASLKALGILP  
OXA-50-like\_QLD73935.1 P.a. GGEADIGKRVELGKASLKALGILP  
OXA-50-like\_QLD78684.1 P.a. GGEADIGKRVELGKASLKALGILP  
OXA-50-like\_QLF37576.1 P.a. GGEADIGKRVELGKASLKALGILP  
OXA-50-like\_AWT32452.1 P.a. GGEADIGKRVELGKASLKALGILP  
OXA-50-like\_AXZ92060.1 P.a. GGEADIGKRVELGKASLKALGILP  
OXA-50-like\_QII97759.1 P.a. GGEADIGKRVELGKASLKALGILP  
OXA-50-like\_QOE13519.1 P.a. GGEADIGKRVELGKASLKALGILP  
OXA-50-like\_QPN23057.1 P.a. GGEADIGKRVELGKASLKALGILP  
OXA-50-like\_QDR14302.1 P.a. GGEADIGKRVELGKASLKALGILP  
OXA-50-like\_ALZ16475.1 P.a. GGEADIGKRVELGKASLKALGILP  
OXA-50-like\_QKF04533.1 P.a. GGEADIGKRVELGKASLKALGILP  
OXA-50-like\_QNO22317.1 P.a. GGEADIGKRVELGKASLKALGILP  
OXA-50-like\_QQW12925.1 P.a. GGEADIGKRVELGKASLKALGILP  
OXA-50-like\_AYZ81447.1 P.a. GGEADIGKRVELGKASLKALGILP  
OXA-50-like\_QKL16662.1 P.a. GGEADIGKRVELGKASLKALGILP  
OXA-50-like\_QQW00026.1 P.a. GGEADIGKRVELGKASLKALGILP  
OXA-50-like\_ALV75159.1 P.a. GGEADIGKRVELGKASLKALGILP  
OXA-50-like\_ALY89963.1 P.a. GGEADIGKRVELGKASLKALGILP  
OXA-50-like\_QY96872.1 P.a. GGEADIGKRVELGKASLKALGILP  
OXA-50-like\_AMX88486.1 P.a. GGEADIGKRVELGKASLKALGILP  
OXA-50-like\_ARC82831.1 P.a. GGEADIGKRVELGKASLKALGILP  
OXA-50-like\_ASD14027.1 P.a. GGEADIGKRVELGKASLKALGILP  
OXA-50-like\_AYZ75988.1 P.a. GGEADIGKRVELGKASLKALGILP  
OXA-50-like\_QFZ61919.1 P.a. GGEADIGKRVELGKASLKALGILP  
OXA-50-like\_QKP90385.1 P.a. GGEADIGKRVELGKASLKALGILP  
OXA-50-like\_QKR47436.1 P.a. GGEADIGKRVELGKASLKALGILP  
OXA-50-like\_QKR53224.1 P.a. GGEADIGKRVELGKASLKALGILP  
OXA-50-like\_QHY59118.1 P.a. GGEADIGKRVELGKASLKALGILP  
OXA-50-like\_QLF25267.1 P.a. GGEADIGKRVELGKASLKALGILP  
OXA-50-like\_QPP21637.1 P.a. GGEADIGKRVELGKASLKALGILP  
OXA-50-like\_QQA85373.1 P.a. GGEADIGKRVELGKASLKALGILP  
OXA-50-like\_QRG72678.1 P.a. GGEADIGKRVELGKASLKALGILP  
OXA-50-like\_AY40220.1 P.a. GGEADIGKRVELGKASLKALGILP  
OXA-50-like\_ALZ28576.1 P.a. GGEADIGKRVELGKASLKALGILP  
OXA-50-like\_QNQ04301.1 P.a. GGEADIGKRVELGKASLKALGILP  
OXA-50-like\_ALZ94285.1 P.a. GGEADIGKRVELGKASLKALGILP  
OXA-50-like\_AMU04106.1 P.a. GGEADIGKRVELGKASLKALGILP  
OXA-50-like\_AOT37986.1 P.a. GGEADIGKRVELGKASLKALGILP  
OXA-50-like\_ASD20357.1 P.a. GGEADIGKRVELGKASLKALGILP  
OXA-50-like\_AVZ22774.1 P.a. GGEADIGKRVELGKASLKALGILP  
OXA-50-like\_AXC20842.1 P.a. GGEADIGKRVELGKASLKALGILP  
OXA-50-like\_AYN84711.1 P.a. GGEADIGKRVELGKASLKALGILP  
OXA-50-like\_CRZ33166.1 P.a. GGEADIGKRVELGKASLKALGILP  
OXA-50-like\_QBF65101.1 P.a. GGEADIGKRVELGKASLKALGILP  
OXA-50-like\_QEF81401.1 P.a. GGEADIGKRVELGKASLKALGILP  
OXA-50-like\_QEF87414.1 P.a. GGEADIGKRVELGKASLKALGILP  
OXA-50-like\_QEF93418.1 P.a. GGEADIGKRVELGKASLKALGILP  
OXA-50-like\_QGM44151.1 P.a. GGEADIGKRVELGKASLKALGILP  
OXA-50-like\_QHI63098.1 P.a. GGEADIGKRVELGKASLKALGILP  
OXA-50-like\_QIB85902.1 P.a. GGEADIGKRVELGKASLKALGILP  
OXA-50-like\_QKR06746.1 P.a. GGEADIGKRVELGKASLKALGILP  
OXA-50-like\_QKR13035.1 P.a. GGEADIGKRVELGKASLKALGILP  
OXA-50-like\_QKR18855.1 P.a. GGEADIGKRVELGKASLKALGILP  
OXA-50-like\_QKR83750.1 P.a. GGEADIGKRVELGKASLKALGILP  
OXA-50-like\_QLF31591.1 P.a. GGEADIGKRVELGKASLKALGILP  
OXA-50-like\_VDL04843.1 P.a. GGEADIGKRVELGKASLKALGILP  
OXA-50-like\_QCP80115.1 P.a. GGEADIGKRVELGKASLKALGILP  
OXA-50-like\_QEK88934.1 P.a. GGEADIGKRVELGKASLKALGILP  
OXA-50-like\_ALU47404.1 P.a. GGEADIGKRVELGKASLKALGILP  
OXA-50-like\_APC75958.1 P.a. GGEADIGKRVELGKASLKALGILP  
OXA-50-like\_QPZ59753.1 P.a. GGEADIGKRVELGKASLKALGILP  
OXA-50-like\_QFZ03142.1 P.a. GGEADIGKRVELGKASLKALGILP  
OXA-50-like\_QGG01915.1 P.a. GGEADIGKRVELGKASLKALGILP  
OXA-50-like\_AUA86524.1 P.a. GGEADIGKRVELSKASLKALGILP  
OXA-50-like\_AUA92615.1 P.a. GGEADIGKRVELSKASLKALGILP  
4JF4\_Beta-lactamase .SEMPASIRNELLMKSLKQLNII.

acc

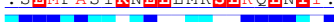

$$\alpha_1 \qquad \qquad \qquad \beta_1$$
[illegible]



OXA-51-like subfamily

OXA-51-like\_ARGO2295.1\_A.b  
 OXA-51-like\_ARG25110.1\_A.b  
 OXA-51-like\_AYCO1674.1\_A.b  
 OXA-51-like\_ATU49292.1\_A.b  
 OXA-51-like\_ATU52990.1\_A.b  
 OXA-51-like\_ATU56628.1\_A.b  
 OXA-51-like\_AZK38077.1\_A.b  
 OXA-51-like\_AZK41733.1\_A.b  
 OXA-51-like\_QAS39909.1\_A.b  
 OXA-51-like\_QAS33473.1\_A.b  
 OXA-51-like\_ACC56872.1\_A.b  
 OXA-51-like\_ADX91666.1\_A.b  
 OXA-51-like\_ADX92178.1\_A.b  
 OXA-51-like\_AGQ10228.1\_A.b  
 OXA-51-like\_ALX99780.1\_A.b  
 OXA-51-like\_AMC15222.1\_A.b  
 OXA-51-like\_ANB88975.1\_A.b  
 OXA-51-like\_AOX69607.1\_A.b  
 OXA-51-like\_AOX73369.1\_A.b  
 OXA-51-like\_AOX77482.1\_A.b  
 OXA-51-like\_AOX81661.1\_A.b  
 OXA-51-like\_AOX85074.1\_A.b  
 OXA-51-like\_AOX88942.1\_A.b  
 OXA-51-like\_AOX92779.1\_A.b  
 OXA-51-like\_AOX96637.1\_A.b  
 OXA-51-like\_APF43961.1\_A.b  
 OXA-51-like\_APJ23527.1\_A.b  
 OXA-51-like\_APM48724.1\_A.b  
 OXA-51-like\_APQ85553.1\_A.b  
 OXA-51-like\_APQ93188.1\_A.b  
 OXA-51-like\_AQU55455.1\_A.b  
 OXA-51-like\_ARF91818.1\_A.b  
 OXA-51-like\_ARF95229.1\_A.b  
 OXA-51-like\_ARG04169.1\_A.b  
 OXA-51-like\_ARG09260.1\_A.b  
 OXA-51-like\_ARG14122.1\_A.b  
 OXA-51-like\_ARG20812.1\_A.b  
 OXA-51-like\_ARG26815.1\_A.b  
 OXA-51-like\_ATR88137.1\_A.b  
 OXA-51-like\_AUG20293.1\_A.b  
 OXA-51-like\_AUG11400.1\_A.b  
 OXA-51-like\_AVE45033.1\_A.b  
 OXA-51-like\_AVE90526.1\_A.b  
 OXA-51-like\_AVO88307.1\_A.b  
 OXA-51-like\_AWO15631.1\_A.b  
 OXA-51-like\_AWW7737.1\_A.b  
 OXA-51-like\_AWW85353.1\_A.b  
 OXA-51-like\_AWX91373.1\_A.b  
 OXA-51-like\_AXX48901.1\_A.b  
 OXA-51-like\_AXX5862.1\_A.b  
 OXA-51-like\_QBA07478.1\_A.b  
 OXA-51-like\_QBB77223.1\_A.b  
 OXA-51-like\_QCH33275.1\_A.b  
 OXA-51-like\_QCP15970.1\_A.b  
 OXA-51-like\_QCP19079.1\_A.b  
 OXA-51-like\_QCP45479.1\_A.b  
 OXA-51-like\_QDR93660.1\_A.b  
 OXA-51-like\_QEY27958.1\_A.b  
 OXA-51-like\_QIX30833.1\_A.b  
 OXA-51-like\_QIX34674.1\_A.b  
 OXA-51-like\_QIX38631.1\_A.b  
 OXA-51-like\_QIX42205.1\_A.b  
 OXA-51-like\_QIX46166.1\_A.b  
 OXA-51-like\_QJG69125.1\_A.b  
 OXA-51-like\_QJG72958.1\_A.b  
 OXA-51-like\_QJG68231.1\_A.b  
 OXA-51-like\_QJG91989.1\_A.b  
 OXA-51-like\_QJG95953.1\_A.b  
 OXA-51-like\_QJG99403.1\_A.b  
 OXA-51-like\_QJH07093.1\_A.b  
 OXA-51-like\_QJH10219.1\_A.b  
 OXA-51-like\_QJH14483.1\_A.b  
 OXA-51-like\_QJH17776.1\_A.b  
 OXA-51-like\_QJP31173.1\_A.b  
 OXA-51-like\_QLA73304.1\_A.b  
 OXA-51-like\_QNV12531.1\_A.b  
 OXA-51-like\_QAS93855.1\_A.b  
 OXA-51-like\_QAT01315.1\_A.b  
 OXA-51-like\_QAS97806.1\_A.b  
 OXA-51-like\_QAT04873.1\_A.b  
 OXA-51-like\_QEB57116.1\_A.b  
 OXA-51-like\_ADX03652.1\_A.b  
 OXA-51-like\_QC082814.1\_A.b  
 OXA-51-like\_AJP841571.1\_A.b  
 OXA-51-like\_ATP87403.1\_A.b  
 OXA-51-like\_AKA33028.1\_A.b  
 OXA-51-like\_ALJ88113.1\_A.b  
 OXA-51-like\_ARG31555.1\_A.b  
 OXA-51-like\_ASF77094.1\_A.b  
 OXA-51-like\_AVN14185.1\_A.b  
 OXA-51-like\_AVN25165.1\_A.b  
 OXA-51-like\_AXB14467.1\_A.b  
 OXA-51-like\_QLG79253.1\_A.b  
 OXA-51-like\_QQB68144.1\_A.b  
 OXA-51-like\_SQ155469.1\_A.b  
 OXA-51-like\_QJH03197.1\_A.b  
 OXA-51-like\_QHB90233.1\_A.b  
 OXA-51-like\_BBR73296.1\_A.b

acc

## 4ZDX\_Beta-lactamase

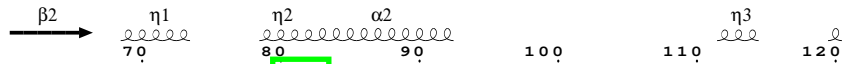

2DZX Beta-Lactamase  
 OXA-51-like QLB35675.1 A.b.  
 OXA-51-like AUT37227.1 A.b.  
 OXA-51-like QJF39460.1 A.b.  
 OXA-51-like QLI40100.1 A.b.  
 OXA-51-like ARG36573.1 A.b.  
 OXA-51-like ASO71619.1 A.b.  
 OXA-51-like AVP34890.1 A.b.  
 OXA-51-like QCR89674.1 A.b.  
 OXA-51-like QJH20957.1 A.b.  
 OXA-51-like QMS82274.1 A.b.  
 OXA-51-like QCT16238.1 A.b.  
 OXA-51-like AVF07049.1 A.b.  
 OXA-51-like AVF08444.1 A.b.  
 OXA-51-like QBR77846.1 A.b.  
 OXA-51-like QBR79997.1 A.b.  
 OXA-51-like ABO11944.2 A.b.  
 OXA-51-like AGH35408.1 A.b.  
 OXA-51-like BBT49379.1 A.b.  
 OXA-51-like QAB40708.1 A.b.  
 OXA-51-like QDQ60454.1 A.b.  
 OXA-51-like QJG23678.1 A.b.  
 OXA-51-like QLI36478.1 A.b.  
 OXA-51-like QNT82744.1 A.b.  
 OXA-51-like APX50552.1 A.b.  
 OXA-51-like QER37219.1 A.b.  
 OXA-51-like QLF06531.1 A.b.  
 OXA-51-like AQG06390.1 A.b.  
 OXA-51-like QCP28577.1 A.b.  
 OXA-51-like AIY37715.2 A.b.  
 OXA-51-like APO58838.2 A.b.  
 OXA-51-like AXK43643.1 A.b.  
 OXA-51-like QBY14110.1 A.b.  
 OXA-51-like QCP23393.1 A.b.  
 OXA-51-like QJG76604.1 A.b.  
 OXA-51-like QJG80512.1 A.b.  
 OXA-51-like QJG83258.1 A.b.  
 OXA-51-like QJF37521.1 A.b.  
 OXA-51-like ARG37991.1 A.b.  
 OXA-51-like ANM01331.1 A.b.  
 OXA-51-like ARN31023.1 A.b.  
 OXA-51-like QDM66466.1 A.b.  
 OXA-51-like QEY04089.1 A.b.  
 OXA-51-like QFQ05250.1 A.b.  
 OXA-51-like QGX51318.1 A.b.  
 OXA-51-like QPP12630.1 A.b.  
 OXA-51-like QNT83403.1 A.b.  
 OXA-51-like QJF14787.1 A.b.  
 OXA-51-like QJF32440.1 A.b.  
 OXA-51-like QJF35790.1 A.b.  
 OXA-51-like QLF10281.1 A.b.  
 OXA-51-like AYY52683.1 A.b.  
 OXA-51-like SCD15761.1 A.b.  
 OXA-51-like BAP66909.1 A.b.  
 OXA-51-like QCP30880.1 A.b.  
 OXA-51-like QER75560.1 A.b.  
 OXA-51-like QCO80718.1 A.b.  
 OXA-51-like QCD18717.1 A.b.  
 OXA-51-like QCD22484.1 A.b.  
 OXA-51-like QRN22730.1 A.b.  
 OXA-51-like QRN17816.1 A.b.  
 OXA-51-like QRN09142.1 A.b.  
 OXA-51-like QRN14361.1 A.b.  
 OXA-51-like AHB91645.1 A.b.  
 OXA-51-like QET176099.1 A.b.  
 OXA-51-like QBY88347.1 A.b.  
 OXA-51-like ANC35117.1 A.b.  
 OXA-51-like APJ19826.1 A.b.  
 OXA-51-like AVE55122.1 A.b.  
 OXA-51-like AVO92126.1 A.b.  
 OXA-51-like AXG84775.1 A.b.  
 OXA-51-like AXH40472.1 A.b.  
 OXA-51-like AYY89494.1 A.b.  
 OXA-51-like QFH45392.1 A.b.  
 OXA-51-like QFY69235.1 A.b.  
 OXA-51-like QJF27678.1 A.b.  
 OXA-51-like AML74598.1 A.b.  
 OXA-51-like AOP26964.1 A.b.  
 OXA-51-like AFU38004.1 A.b.  
 OXA-51-like AML67359.1 A.b.  
 OXA-51-like AML71041.1 A.b.  
 OXA-51-like AML63873.1 A.b.  
 OXA-51-like QKX74898.1 A.b.  
 OXA-51-like QFX70271.1 A.b.  
 OXA-51-like QEK67468.1 A.b.  
 OXA-51-like QEK74707.1 A.b.  
 OXA-51-like QEK71081.1 A.b.  
 OXA-51-like QFZ58831.1 A.b.  
 OXA-51-like QAS47153.1 A.b.  
 OXA-51-like QAS43533.1 A.b.  
 OXA-51-like QNV16375.1 A.b.  
 OXA-51-like QNV20321.1 A.b.  
 OXA-51-like QNV24005.1 A.b.  
 OXA-51-like QNV27835.1 A.b.  
 OXA-51-like QNV31585.1 A.b.  
 OXA-51-like QPN98293.1 A.b.  
 OXA-51-like QPO01798.1 A.b.  
 OXA-51-like QOD93954.1 A.b.  
 OXA-51-like QOD94685.1 A.b.  
 OXA-51-like QOD98482.1 A.b.  
 OXA-51-like QOE02276.1 A.b.  
 OXA-51-like SBS22256.1 A.b.  
 OXA-51-like AEP06182.1 A.b.  
 OXA-51-like QJG23678.1 A.b.  
 OXA-51-like QLI36478.1 A.b.  
 OXA-51-like QNT82744.1 A.b.  
 OXA-51-like APX50552.1 A.b.  
 OXA-51-like QER37219.1 A.b.  
 OXA-51-like QLF06531.1 A.b.  
 OXA-51-like AQG06390.1 A.b.  
 OXA-51-like QCP28577.1 A.b.  
 OXA-51-like AIY37715.2 A.b.  
 OXA-51-like APO58838.2 A.b.  
 OXA-51-like AXK43643.1 A.b.  
 OXA-51-like QBY14110.1 A.b.  
 OXA-51-like QCP23393.1 A.b.  
 OXA-51-like QJG76604.1 A.b.  
 OXA-51-like QJG80512.1 A.b.  
 OXA-51-like QJG83258.1 A.b.  
 OXA-51-like QJF37521.1 A.b.  
 OXA-51-like ARG37991.1 A.b.  
 OXA-51-like ANM01331.1 A.b.  
 OXA-51-like ARN31023.1 A.b.  
 OXA-51-like QDM66466.1 A.b.  
 OXA-51-like QEY04089.1 A.b.  
 OXA-51-like QFQ05250.1 A.b.  
 OXA-51-like QGX51318.1 A.b.  
 OXA-51-like QPP12630.1 A.b.  
 OXA-51-like QNT83403.1 A.b.  
 OXA-51-like QJF14787.1 A.b.  
 OXA-51-like QJF32440.1 A.b.  
 OXA-51-like QJF35790.1 A.b.  
 OXA-51-like QLF10281.1 A.b.  
 OXA-51-like AYY52683.1 A.b.  
 OXA-51-like SCD15761.1 A.b.  
 OXA-51-like BAP66909.1 A.b.  
 OXA-51-like QCP30880.1 A.b.  
 OXA-51-like QER75560.1 A.b.  
 OXA-51-like QCO80718.1 A.b.  
 OXA-51-like QCD18717.1 A.b.  
 OXA-51-like QCD22484.1 A.b.  
 OXA-51-like QRN22730.1 A.b.  
 OXA-51-like QRN17816.1 A.b.  
 OXA-51-like QRN09142.1 A.b.  
 OXA-51-like QRN14361.1 A.b.  
 OXA-51-like AHB91645.1 A.b.  
 OXA-51-like QET176099.1 A.b.  
 OXA-51-like QBY88347.1 A.b.  
 OXA-51-like ANC35117.1 A.b.  
 OXA-51-like APJ19826.1 A.b.  
 OXA-51-like AVE55122.1 A.b.  
 OXA-51-like AVO92126.1 A.b.  
 OXA-51-like AXG84775.1 A.b.  
 OXA-51-like AXH40472.1 A.b.  
 OXA-51-like AYY89494.1 A.b.  
 OXA-51-like QFH45392.1 A.b.  
 OXA-51-like QFY69235.1 A.b.  
 OXA-51-like QJF27678.1 A.b.  
 OXA-51-like AML74598.1 A.b.  
 OXA-51-like AOP26964.1 A.b.  
 OXA-51-like AFU38004.1 A.b.  
 OXA-51-like AML67359.1 A.b.  
 OXA-51-like AML71041.1 A.b.  
 OXA-51-like AML63873.1 A.b.  
 OXA-51-like QKX74898.1 A.b.  
 OXA-51-like QFX70271.1 A.b.  
 OXA-51-like QEK67468.1 A.b.  
 OXA-51-like QEK74707.1 A.b.  
 OXA-51-like QEK71081.1 A.b.  
 OXA-51-like QFZ58831.1 A.b.  
 OXA-51-like QAS47153.1 A.b.  
 OXA-51-like QAS43533.1 A.b.  
 OXA-51-like QNV16375.1 A.b.  
 OXA-51-like QNV20321.1 A.b.  
 OXA-51-like QNV24005.1 A.b.  
 OXA-51-like QNV27835.1 A.b.  
 OXA-51-like QNV31585.1 A.b.  
 OXA-51-like QPN98293.1 A.b.  
 OXA-51-like QPO01798.1 A.b.  
 OXA-51-like QOD93954.1 A.b.  
 OXA-51-like QOD94685.1 A.b.  
 OXA-51-like QOD98482.1 A.b.  
 OXA-51-like QOE02276.1 A.b.  
 OXA-51-like SBS22256.1 A.b.  
 OXA-



OXA-51-like subfamily

OXA-51-like\_ARGO2295.1\_A.b.  
OXA-51-like\_ARG20110.1\_A.b.  
OXA-51-like\_AYCO1674.1\_A.b.  
OXA-51-like\_ATU49292.1\_A.b.  
OXA-51-like\_ATU52990.1\_A.b.  
OXA-51-like\_ATU56628.1\_A.b.  
OXA-51-like\_AZK38077.1\_A.b.  
OXA-51-like\_AZK41733.1\_A.b.  
OXA-51-like\_QAS39909.1\_A.b.  
OXA-51-like\_QAS33473.1\_A.b.  
OXA-51-like\_ACC56872.1\_A.b.  
OXA-51-like\_ADX91666.1\_A.b.  
OXA-51-like\_ADX92178.1\_A.b.  
OXA-51-like\_AGQ10228.1\_A.b.  
OXA-51-like\_ALX99780.1\_A.b.  
OXA-51-like\_AMC15222.1\_A.b.  
OXA-51-like\_ANB88975.1\_A.b.  
OXA-51-like\_AOX69607.1\_A.b.  
OXA-51-like\_AOX73369.1\_A.b.  
OXA-51-like\_AOX77482.1\_A.b.  
OXA-51-like\_AOX81661.1\_A.b.  
OXA-51-like\_AOX85074.1\_A.b.  
OXA-51-like\_AOX88942.1\_A.b.  
OXA-51-like\_AOX92779.1\_A.b.  
OXA-51-like\_AOX96637.1\_A.b.  
OXA-51-like\_APF43967.1\_A.b.  
OXA-51-like\_APJ23521.1\_A.b.  
OXA-51-like\_APM48724.1\_A.b.  
OXA-51-like\_APQ85553.1\_A.b.  
OXA-51-like\_APQ93188.1\_A.b.  
OXA-51-like\_AQU55455.1\_A.b.  
OXA-51-like\_ARF91818.1\_A.b.  
OXA-51-like\_ARF95229.1\_A.b.  
OXA-51-like\_ARG04169.1\_A.b.  
OXA-51-like\_ARG09260.1\_A.b.  
OXA-51-like\_ARG14122.1\_A.b.  
OXA-51-like\_ARG20812.1\_A.b.  
OXA-51-like\_ARG26815.1\_A.b.  
OXA-51-like\_ATR88137.1\_A.b.  
OXA-51-like\_ATU22923.1\_A.b.  
OXA-51-like\_AUG11400.1\_A.b.  
OXA-51-like\_AVE45033.1\_A.b.  
OXA-51-like\_AVE90526.1\_A.b.  
OXA-51-like\_AVO88307.1\_A.b.  
OXA-51-like\_AWO15631.1\_A.b.  
OXA-51-like\_AWW77770.1\_A.b.  
OXA-51-like\_AWW85353.1\_A.b.  
OXA-51-like\_AXW91373.1\_A.b.  
OXA-51-like\_XXX48901.1\_A.b.  
OXA-51-like\_XXX55862.1\_A.b.  
OXA-51-like\_QBA07478.1\_A.b.  
OXA-51-like\_QBB77223.1\_A.b.  
OXA-51-like\_QCH33275.1\_A.b.  
OXA-51-like\_QCP15970.1\_A.b.  
OXA-51-like\_QCP19079.1\_A.b.  
OXA-51-like\_QCF45479.1\_A.b.  
OXA-51-like\_QDR93660.1\_A.b.  
OXA-51-like\_QEY27958.1\_A.b.  
OXA-51-like\_QIX30833.1\_A.b.  
OXA-51-like\_QIX34674.1\_A.b.  
OXA-51-like\_QIX38631.1\_A.b.  
OXA-51-like\_QIX42205.1\_A.b.  
OXA-51-like\_QIX46166.1\_A.b.  
OXA-51-like\_QJG69125.1\_A.b.  
OXA-51-like\_QJG72958.1\_A.b.  
OXA-51-like\_QJG88231.1\_A.b.  
OXA-51-like\_QJG91989.1\_A.b.  
OXA-51-like\_QJG95953.1\_A.b.  
OXA-51-like\_QJG99403.1\_A.b.  
OXA-51-like\_QJH07093.1\_A.b.  
OXA-51-like\_QJH10219.1\_A.b.  
OXA-51-like\_QJH14483.1\_A.b.  
OXA-51-like\_QJH17776.1\_A.b.  
OXA-51-like\_QJP31173.1\_A.b.  
OXA-51-like\_QLA74304.1\_A.b.  
OXA-51-like\_QNV12531.1\_A.b.  
OXA-51-like\_QAS93855.1\_A.b.  
OXA-51-like\_QAT01315.1\_A.b.  
OXA-51-like\_QAS97806.1\_A.b.  
OXA-51-like\_QAT04873.1\_A.b.  
OXA-51-like\_QEE57116.1\_A.b.  
OXA-51-like\_ADX03652.1\_A.b.  
OXA-51-like\_QOC082814.1\_A.b.  
OXA-51-like\_AJF81571.1\_A.b.  
OXA-51-like\_ATP87403.1\_A.b.  
OXA-51-like\_AKA32028.1\_A.b.  
OXA-51-like\_ALJ88113.1\_A.b.  
OXA-51-like\_ARG31555.1\_A.b.  
OXA-51-like\_ASF77094.1\_A.b.  
OXA-51-like\_AVN14185.1\_A.b.  
OXA-51-like\_AVN25165.1\_A.b.  
OXA-51-like\_AXB14667.1\_A.b.  
OXA-51-like\_QLG79253.1\_A.b.  
OXA-51-like\_QQB68144.1\_A.b.  
OXA-51-like\_SQT55469.1\_A.b.  
OXA-51-like\_QJH03197.1\_A.b.  
OXA-51-like\_QHB90233.1\_A.b.  
OXA-51-like\_BBR73296.1\_A.b.



OXA-51-like subfamily

| 4ZDX_Beta-lactamase         | α3    |   |   |   |   |   |   |   |   |   | α4         |   |   |   |   |   |   |   |   |   | α5         |   |   |   |   |   |   |   |   |   | α6   |   |   |   |   |   |   |   |   |   | α7     |   |   |   |   |   |   |   |   |   |   |   |   |   |   |   |   |   |   |
|-----------------------------|-------|---|---|---|---|---|---|---|---|---|------------|---|---|---|---|---|---|---|---|---|------------|---|---|---|---|---|---|---|---|---|------|---|---|---|---|---|---|---|---|---|--------|---|---|---|---|---|---|---|---|---|---|---|---|---|---|---|---|---|---|
|                             | 00000 |   |   |   |   |   |   |   |   |   | 0000000000 |   |   |   |   |   |   |   |   |   | 0000000000 |   |   |   |   |   |   |   |   |   | 0000 |   |   |   |   |   |   |   |   |   | 000000 |   |   |   |   |   |   |   |   |   |   |   |   |   |   |   |   |   |   |
|                             | 130   |   |   |   |   |   |   |   |   |   | 140        |   |   |   |   |   |   |   |   |   | 150        |   |   |   |   |   |   |   |   |   | 160  |   |   |   |   |   |   |   |   |   | 170    |   |   |   |   |   |   |   |   |   |   |   |   |   |   |   |   |   |   |
| 4ZDX_Beta-lactamase         | G     | D | A | M | K | A | S | A | I | P | V          | Y | Q | D | L | A | R | R | I | G | L          | E | L | M | S | K | E | V | K | R | V    | G | Y | G | N | A | D | I | G | T | Q      | V | D | N | F | W | L | V | G | P | L | K | I | T | P | Q | E | A | O |
| OXA-51-like_QLB35675.1.A.b. | G     | D | A | M | K | A | S | A | I | P | V          | Y | Q | D | L | A | R | R | I | G | L          | E | L | M | S | K | E | V | K | R | V    | G | Y | G | N | A | D | I | G | T | Q      | V | D | N | F | W | L | V | G | P | L | K | I | T | P | Q | E | A | O |
| OXA-51-like_AUT37227.1.A.b. | G     | D | A | M | K | A | S | A | I | P | V          | Y | Q | D | L | A | R | R | I | G | L          | E | L | M | S | K | E | V | K | R | V    | G | Y | G | N | A | D | I | G | T | Q      | V | D | N | F | W | L | V | G | P | L | K | I | T | P | Q | E | A | O |
| OXA-51-like_QJF39460.1.A.b. | G     | D | A | M | K | A | S | A | I | P | V          | Y | Q | D | L | A | R | R | I | G | L          | E | L | M | S | K | E | V | K | R | V    | G | Y | G | N | A | D | I | G | T | Q      | V | D | N | F | W | L | V | G | P | L | K | I | T | P | Q | E | A | O |
| OXA-51-like_QLI40100.1.A.b. | G     | D | A | M | K | A | S | A | I | P | V          | Y | Q | D | L | A | R | R | I | G | L          | E | L | M | S | K | E | V | K | R | V    | G | Y | G | N | A | D | I | G | T | Q      | V | D | N | F | W | L | V | G | P | L | K | I | T | P | Q | E | A | O |
| OXA-51-like_ARG36573.1.A.b. | G     | D | A | M | K | A | S | A | I | P | V          | Y | Q | D | L | A | R | R | I | G | L          | E | L | M | S | K | E | V | K | R | V    | G | Y | G | N | A | D | I | G | T | Q      | V | D | N | F | W | L | V | G | P | L | K | I | T | P | Q | E | A | O |
| OXA-51-like_AS071619.1.A.b. | G     | D | A | M | K | A | S | A | I | P | V          | Y | Q | D | L | A | R | R | I | G | L          | E | L | M | S | K | E | V | K | R | V    | G | Y | G | N | A | D | I | G | T | Q      | V | D | N | F | W | L | V | G | P | L | K | I | T | P | Q | E | A | O |
| OXA-51-like_AVF34890.1.A.b. | G     | D | A | M | K | A | S | A | I | P | V          | Y | Q | D | L | A | R | R | I | G | L          | E | L | M | S | K | E | V | K | R | V    | G | Y | G | N | A | D | I | G | T | Q      | V | D | N | F | W | L | V | G | P | L | K | I | T | P | Q | E | A | O |
| OXA-51-like_QCR8            |       |   |   |   |   |   |   |   |   |   |            |   |   |   |   |   |   |   |   |   |            |   |   |   |   |   |   |   |   |   |      |   |   |   |   |   |   |   |   |   |        |   |   |   |   |   |   |   |   |   |   |   |   |   |   |   |   |   |   |

## OXA-51-like subfamily

OXA-51-like ARG02295.1 A.b.  
OXA-51-like ARG25110.1 A.b.  
OXA-51-like AYC01674.1 A.b.  
OXA-51-like ATU49292.1 A.b.  
OXA-51-like ATU52990.1 A.b.  
OXA-51-like ATU56628.1 A.b.  
OXA-51-like AZK38077.1 A.b.  
OXA-51-like AZK41733.1 A.b.  
OXA-51-like QAS39909.1 A.b.  
OXA-51-like QAS33473.1 A.b.  
OXA-51-like ACC56872.1 A.b.  
OXA-51-like ADX91666.1 A.b.  
OXA-51-like ADX92178.1 A.b.  
OXA-51-like AGL00228.1 A.b.  
OXA-51-like ALX99780.1 A.b.  
OXA-51-like ANM15222.1 A.b.  
OXA-51-like ANB88975.1 A.b.  
OXA-51-like AOX69607.1 A.b.  
OXA-51-like AOX73369.1 A.b.  
OXA-51-like AOX77482.1 A.b.  
OXA-51-like AOX81661.1 A.b.  
OXA-51-like AOX85074.1 A.b.  
OXA-51-like AOX88942.1 A.b.  
OXA-51-like AOX92779.1 A.b.  
OXA-51-like AOX96637.1 A.b.  
OXA-51-like APF43961.1 A.b.  
OXA-51-like APJ23527.1 A.b.  
OXA-51-like APM48724.1 A.b.  
OXA-51-like APQ85553.1 A.b.  
OXA-51-like APQ93188.1 A.b.  
OXA-51-like AQU55545.1 A.b.  
OXA-51-like ARF91818.1 A.b.  
OXA-51-like ARF95229.1 A.b.  
OXA-51-like ARG04169.1 A.b.  
OXA-51-like ARG09260.1 A.b.  
OXA-51-like ARG14122.1 A.b.  
OXA-51-like ARG20812.1 A.b.  
OXA-51-like ARG26815.1 A.b.  
OXA-51-like ATR88137.1 A.b.  
OXA-51-like ATU22923.1 A.b.  
OXA-51-like AUG11400.1 A.b.  
OXA-51-like AVE45033.1 A.b.  
OXA-51-like AVE90526.1 A.b.  
OXA-51-like AV088307.1 A.b.  
OXA-51-like AWO15631.1 A.b.  
OXA-51-like AWW77770.1 A.b.  
OXA-51-like AWW85353.1 A.b.  
OXA-51-like AXW91373.1 A.b.  
OXA-51-like AXX48901.1 A.b.  
OXA-51-like AXX55862.1 A.b.  
OXA-51-like QBA07478.1 A.b.  
OXA-51-like QBB77223.1 A.b.  
OXA-51-like QCH33275.1 A.b.  
OXA-51-like QCP15970.1 A.b.  
OXA-51-like QCP19079.1 A.b.  
OXA-51-like QCP45479.1 A.b.  
OXA-51-like QDR93660.1 A.b.  
OXA-51-like QEY27958.1 A.b.  
OXA-51-like QIX30833.1 A.b.  
OXA-51-like QIX34674.1 A.b.  
OXA-51-like QIX38631.1 A.b.  
OXA-51-like QIX42205.1 A.b.  
OXA-51-like QIX46166.1 A.b.  
OXA-51-like QJG669125.1 A.b.  
OXA-51-like QJG72958.1 A.b.  
OXA-51-like QJG88231.1 A.b.  
OXA-51-like QJG91989.1 A.b.  
OXA-51-like QJG95593.1 A.b.  
OXA-51-like QJG99403.1 A.b.  
OXA-51-like QJH07093.1 A.b.  
OXA-51-like QJH10219.1 A.b.  
OXA-51-like QJH14483.1 A.b.  
OXA-51-like QJH17776.1 A.b.  
OXA-51-like QJP31173.1 A.b.  
OXA-51-like QLA73304.1 A.b.  
OXA-51-like QNV12531.1 A.b.  
OXA-51-like QAS93855.1 A.b.  
OXA-51-like QAT70131.1 A.b.  
OXA-51-like QAS97806.1 A.b.  
OXA-51-like QAT04873.1 A.b.  
OXA-51-like QEE57116.1 A.b.  
OXA-51-like ADX03652.1 A.b.  
OXA-51-like QC082814.1 A.b.  
OXA-51-like AJP81571.1 A.b.  
OXA-51-like ATP87403.1 A.b.  
OXA-51-like AKK32028.1 A.b.  
OXA-51-like ALJ88113.1 A.b.  
OXA-51-like ARG31555.1 A.b.  
OXA-51-like ASF77094.1 A.b.  
OXA-51-like AVN14185.1 A.b.  
OXA-51-like AVN25165.1 A.b.  
OXA-51-like AXB14467.1 A.b.  
OXA-51-like QLG79253.1 A.b.  
OXA-51-like QQB68144.1 A.b.  
OXA-51-like SQ155469.1 A.b.  
OXA-51-like QJH03197.1 A.b.  
OXA-51-like QHB90233.1 A.b.  
OXA-51-like BBR73296.1 A.b.

[illegible]

*acc*



## 4ZDX\_Beta-lactamase

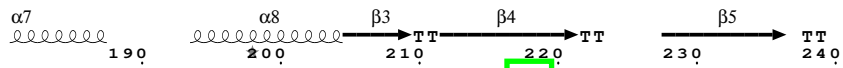

4ZDX\_Beta-lactamase

2ZDX Beta-Lactamase

|                         |      |               |      |       |                    |     |           |      |    |
|-------------------------|------|---------------|------|-------|--------------------|-----|-----------|------|----|
| OXA-51-like_QLB35675.1  | A.b. | FAYKLANKTLPFS | PKVD | EVQSM | LFIEEKNNGNKIYAKSGW | DVD | DPQVGWLTG | WVVP | QG |
| OXA-51-like_AUT37227.1  | A.b. | FAYKLANKTLPFS | PKVD | EVQSM | LFIEEKNNGNKIYAKSGW | DVD | DPQVGWLTG | WVVP | QG |
| OXA-51-like_QLF39460.1  | A.b. | FAYKLANKTLPFS | PKVD | EVQSM | LFIEEKNNGNKIYAKSGW | DVD | DPQVGWLTG | WVVP | QG |
| OXA-51-like_QJ40100.1   | A.b. | FAYKLANKTLPFS | PKVD | EVQSM | LFIEEKNNGNKIYAKSGW | DVD | DPQVGWLTG | WVVP | QG |
| OXA-51-like_ARG36573.1  | A.b. | FAYKLANKTLPFS | PKVD | EVQSM | LFIEEKNNGNKIYAKSGW | DVD | DPQVGWLTG | WVVP | QG |
| OXA-51-like_AS071619.1  | A.b. | FAYKLANKTLPFS | PKVD | EVQSM | LFIEEKNNGNKIYAKSGW | DVD | DPQVGWLTG | WVVP | QG |
| OXA-51-like_AVF34890.1  | A.b. | FAYKLANKTLPFS | PKVD | EVQSM | LFIEEKNNGNKIYAKSGW | DVD | DPQVGWLTG | WVVP | QG |
| OXA-51-like_QCR89674.1  | A.b. | FAYKLANKTLPFS | PKVD | EVQSM | LFIEEKNNGNKIYAKSGW | DVD | DPQVGWLTG | WVVP | QG |
| OXA-51-like_QJH20957.1  | A.b. | FAYKLANKTLPFS | PKVD | EVQSM | LFIEEKNNGNKIYAKSGW | DVD | DPQVGWLTG | WVVP | QG |
| OXA-51-like_QMS82274.1  | A.b. | FAYKLANKTLPFS | PKVD | EVQSM | LFIEEKNNGNKIYAKSGW | DVD | DPQVGWLTG | WVVP | QG |
| OXA-51-like_QCT16238.1  | A.b. | FAYKLANKTLPFS | PKVD | EVQSM | LFIEEKNNGNKIYAKSGW | DVD | DPQVGWLTG | WVVP | QG |
| OXA-51-like_AVF07049.1  | A.b. | FAYKLANKTLPFS | PKVD | EVQSM | LFIEEKNNGNKIYAKSGW | DVD | DPQVGWLTG | WVVP | QG |
| OXA-51-like_AYF08644.1  | A.b. | FAYKLANKTLPFS | PKVD | EVQSM | LFIEEKNNGNKIYAKSGW | DVD | DPQVGWLTG | WVVP | QG |
| OXA-51-like_QBR77846.1  | A.b. | FAYKLANKTLPFS | PKVD | EVQSM | LFIEEKNNGNKIYAKSGW | DVD | DPQVGWLTG | WVVP | QG |
| OXA-51-like_QBR79997.1  | A.b. | FAYKLANKTLPFS | PKVD | EVQSM | LFIEEKNNGNKIYAKSGW | DVD | DPQVGWLTG | WVVP | QG |
| OXA-51-like_ABO11944.2  | A.b. | FAYKLANKTLPFS | PKVD | EVQSM | LFIEEKNNGNKIYAKSGW | DVD | DPQVGWLTG | WVVP | QG |
| OXA-51-like_AGH35408.1  | A.b. | FAYKLANKTLPFS | PKVD | EVQSM | LFIEEKNNGNKIYAKSGW | DVD | DPQVGWLTG | WVVP | QG |
| OXA-51-like_BBT49379.1  | A.b. | FAYKLANKTLPFS | PKVD | EVQSM | LFIEEKNNGNKIYAKSGW | DVD | DPQVGWLTG | WVVP | QG |
| OXA-51-like_QAB40708.1  | A.b. | FAYKLANKTLPFS | PKVD | EVQSM | LFIEEKNNGNKIYAKSGW | DVD | DPQVGWLTG | WVVP | QG |
| OXA-51-like_QDQ60454.1  | A.b. | FAYKLANKTLPFS | PKVD | EVQSM | LFIEEKNNGNKIYAKSGW | DVD | DPQVGWLTG | WVVP | QG |
| OXA-51-like_QYQ23678.1  | A.b. | FAYKLANKTLPFS | PKVD | EVQSM | LFIEEKNNGNKIYAKSGW | DVD | DPQVGWLTG | WVVP | QG |
| OXA-51-like_QLI36478.1  | A.b. | FAYKLANKTLPFS | PKVD | EVQSM | LFIEEKNNGNKIYAKSGW | DVD | DPQVGWLTG | WVVP | QG |
| OXA-51-like_QNT82744.1  | A.b. | FAYKLANKTLPFS | PKVD | EVQSM | LFIEEKNNGNKIYAKSGW | DVD | DPQVGWLTG | WVVP | QG |
| OXA-51-like_APX50552.1  | A.b. | FAYKLANKTLPFS | PKVD | EVQSM | LFIEEKNNGNKIYAKSGW | DVD | DPQVGWLTG | WVVP | QG |
| OXA-51-like_QER37219.1  | A.b. | FAYKLANKTLPFS | PKVD | EVQSM | LFIEEKNNGNKIYAKSGW | DVD | DPQVGWLTG | WVVP | QG |
| OXA-51-like_QLF06531.1  | A.b. | FAYKLANKTLPFS | PKVD | EVQSM | LFIEEKNNGNKIYAKSGW | DVD | DPQVGWLTG | WVVP | QG |
| OXA-51-like_AQ066390.1  | A.b. | FAYKLANKTLPFS | PKVD | EVQSM | LFIEEKNNGNKIYAKSGW | DVD | DPQVGWLTG | WVVP | QG |
| OXA-51-like_QC28577.1   | A.b. | FAYKLANKTLPFS | PKVD | EVQSM | LFIEEKNNGNKIYAKSGW | DVD | DPQVGWLTG | WVVP | QG |
| OXA-51-like_AY37715.2   | A.b. | FAYKLANKTLPFS | PKVD | EVQSM | LFIEEKNNGNKIYAKSGW | DVD | DPQVGWLTG | WVVP | QG |
| OXA-51-like_API058838.1 | A.b. | FAYKLANKTLPFS | PKVD | EVQSM | LFIEEKNNGNKIYAKSGW | DVD | DPQVGWLTG | WVVP | QG |
| OXA-51-like_AXX43643.1  | A.b. | FAYKLANKTLPFS | PKVD | EVQSM | LFIEEKNNGNKIYAKSGW | DVD | DPQVGWLTG | WVVP | QG |
| OXA-51-like_QBY14110.1  | A.b. | FAYKLANKTLPFS | PKVD | EVQSM | LFIEEKNNGNKIYAKSGW | DVD | DPQVGWLTG | WVVP | QG |
| OXA-51-like_QCP23393.1  | A.b. | FAYKLANKTLPFS | PKVD | EVQSM | LFIEEKNNGNKIYAKSGW | DVD | DPQVGWLTG | WVVP | QG |
| OXA-51-like_QJG76604.1  | A.b. | FAYKLANKTLPFS | PKVD | EVQSM | LFIEEKNNGNKIYAKSGW | DVD | DPQVGWLTG | WVVP | QG |
| OXA-51-like_QUG80512.1  | A.b. | FAYKLANKTLPFS | PKVD | EVQSM | LFIEEKNNGNKIYAKSGW | DVD | DPQVGWLTG | WVVP | QG |
| OXA-51-like_QJG83258.1  | A.b. | FAYKLANKTLPFS | PKVD | EVQSM | LFIEEKNNGNKIYAKSGW | DVD | DPQVGWLTG | WVVP | QG |
| OXA-51-like_QJF37521.1  | A.b. | FAYKLANKTLPFS | PKVD | EVQSM | LFIEEKNNGNKIYAKSGW | DVD | DPQVGWLTG | WVVP | QG |
| OXA-51-like_ARG37991.1  | A.b. | FAYKLANKTLPFS | PKVD | EVQSM | LFIEEKNNGNKIYAKSGW | DVD | DPQVGWLTG | WVVP | QG |
| OXA-51-like_ANN01331.1  | A.b. | FAYKLANKTLPFS | PKVD | EVQSM | LFIEEKNNGNKIYAKSGW | DVD | DPQVGWLTG | WVVP | QG |
| OXA-51-like_ARN31023.1  | A.b. | FAYKLANKTLPFS | PKVD | EVQSM | LFIEEKNNGNKIYAKSGW | DVD | DPQVGWLTG | WVVP |    |



OXA-51-like subfamily

|                        |      |               |      |        |                 |     |        |          |        |
|------------------------|------|---------------|------|--------|-----------------|-----|--------|----------|--------|
| OXA-51-like ARG02295.1 | A.b. | FAYKLANKTLPFS | QKVD | DEVQSM | LFIEEKNGNKIYA   | KSG | WGVDVN | POVGWLTG | WVVPQG |
| OXA-51-like ARG25110.1 | A.b. | FAYKLANKTLPFS | QKVD | DEVQSM | LFIEEKNGNKIYA   | KSG | WGVDVN | POVGWLTG | WVVPQG |
| OXA-51-like AYCO1674.1 | A.b. | FAYKLANKTLPFS | QKVD | DEVQSM | LFIEEKNGNKIYA   | KSG | WGVDVN | POVGWLTG | WVVPQG |
| OXA-51-like ATU49292.1 | A.b. | FAYKLANKTLPFS | QKVD | DEVQSM | LFIEEKNGNKIYA   | KSG | WGVDVN | POVGWLTG | WVVPQG |
| OXA-51-like ATU52990.1 | A.b. | FAYKLANKTLPFS | QKVD | DEVQSM | LFIEEKNGNKIYA   | KSG | WGVDVN | POVGWLTG | WVVPQG |
| OXA-51-like ATU55628.1 | A.b. | FAYKLANKTLPFS | QKVD | DEVQSM | LFIEEKNGNKIYA   | KSG | WGVDVN | POVGWLTG | WVVPQG |
| OXA-51-like AZK38077.1 | A.b. | FAYKLANKTLPFS | QKVD | DEVQSM | LFIEEKNGNKIYA   | KSG | WGVDVN | POVGWLTG | WVVPQG |
| OXA-51-like AZK41733.1 | A.b. | FAYKLANKTLPFS | QKVD | DEVQSM | LFIEEKNGNKIYA   | KSG | WGVDVN | POVGWLTG | WVVPQG |
| OXA-51-like QAS39909.1 | A.b. | FAYKLANKTLPFS | QKVD | DEVQSM | LFIEEKNGNKIYA   | KSG | WGVDVN | POVGWLTG | WVVPQG |
| OXA-51-like QAS33473.1 | A.b. | FAYKLANKTLPFS | QKVD | DEVQSM | LFIEEKNGNKIYA   | KSG | WGVDVN | POVGWLTG | WVVPQG |
| OXA-51-like ACC56872.1 | A.b. | FAYKLANKTLPFS | QKVD | DEVQSM | LFIEEKNGNKIYA   | KSG | WGVDVN | POVGWLTG | WVVPQG |
| OXA-51-like ADX91666.1 | A.b. | FAYKLANKTLPFS | QKVD | DEVQSM | LFIEEKNGNKIYA   | KSG | WGVDVN | POVGWLTG | WVVPQG |
| OXA-51-like ADX92178.1 | A.b. | FAYKLANKTLPFS | QKVD | DEVQSM | LFIEEKNGNKIYA   | KSG | WGVDVN | POVGWLTG | WVVPQG |
| OXA-51-like AGQ10228.1 | A.b. | FAYKLANKTLPFS | QKVD | DEVQSM | LFIEEKNGNKIYA   | KSG | WGVDVN | POVGWLTG | WVVPQG |
| OXA-51-like ALX99780.1 | A.b. | FAYKLANKTLPFS | QKVD | DEVQSM | LFIEEKNGNKIYA   | KSG | WGVDVN | POVGWLTG | WVVPQG |
| OXA-51-like ALX51222.1 | A.b. | FAYKLANKTLPFS | QKVD | DEVQSM | LFIEEKNGNKIYA   | KSG | WGVDVN | POVGWLTG | WVVPQG |
| OXA-51-like ANB88975.1 | A.b. | FAYKLANKTLPFS | QKVD | DEVQSM | LFIEEKNGNKIYA   | KSG | WGVDVN | POVGWLTG | WVVPQG |
| OXA-51-like AOX69607.1 | A.b. | FAYKLANKTLPFS | QKVD | DEVQSM | LFIEEKNGNKIYA   | KSG | WGVDVN | POVGWLTG | WVVPQG |
| OXA-51-like AOX73369.1 | A.b. | FAYKLANKTLPFS | QKVD | DEVQSM | LFIEEKNGNKIYA   | KSG | WGVDVN | POVGWLTG | WVVPQG |
| OXA-51-like AOX77482.1 | A.b. | FAYKLANKTLPFS | QKVD | DEVQSM | LFIEEKNGNKIYA   | KSG | WGVDVN | POVGWLTG | WVVPQG |
| OXA-51-like AOX81661.1 | A.b. | FAYKLANKTLPFS | QKVD | DEVQSM | LFIEEKNGNKIYA   | KSG | WGVDVN | POVGWLTG | WVVPQG |
| OXA-51-like AOX85074.1 | A.b. | FAYKLANKTLPFS | QKVD | DEVQSM | LFIEEKNGNKIYA   | KSG | WGVDVN | POVGWLTG | WVVPQG |
| OXA-51-like AOX88942.1 | A.b. | FAYKLANKTLPFS | QKVD | DEVQSM | LFIEEKNGNKIYA   | KSG | WGVDVN | POVGWLTG | WVVPQG |
| OXA-51-like AOX92779.1 | A.b. | FAYKLANKTLPFS | QKVD | DEVQSM | LFIEEKNGNKIYA   | KSG | WGVDVN | POVGWLTG | WVVPQG |
| OXA-51-like AOX96637.1 | A.b. | FAYKLANKTLPFS | QKVD | DEVQSM | LFIEEKNGNKIYA   | KSG | WGVDVN | POVGWLTG | WVVPQG |
| OXA-51-like APF43961.1 | A.b. | FAYKLANKTLPFS | QKVD | DEVQSM | LFIEEKNGNKIYA   | KSG | WGVDVN | POVGWLTG | WVVPQG |
| OXA-51-like APJ23527.1 | A.b. | FAYKLANKTLPFS | QKVD | DEVQSM | LFIEEKNGNKIYA   | KSG | WGVDVN | POVGWLTG | WVVPQG |
| OXA-51-like APM48724.1 | A.b. | FAYKLANKTLPFS | QKVD | DEVQSM | LFIEEKNGNKIYA   | KSG | WGVDVN | POVGWLTG | WVVPQG |
| OXA-51-like APQ85553.1 | A.b. | FAYKLANKTLPFS | QKVD | DEVQSM | LFIEEKNGNKIYA   | KSG | WGVDVN | POVGWLTG | WVVPQG |
| OXA-51-like APQ93188.1 | A.b. | FAYKLANKTLPFS | QKVD | DEVQSM | LFIEEKNGNKIYA   | KSG | WGVDVN | POVGWLTG | WVVPQG |
| OXA-51-like AQU55455.1 | A.b. | FAYKLANKTLPFS | QKVD | DEVQSM | LFIEEKNGNKIYA   | KSG | WGVDVN | POVGWLTG | WVVPQG |
| OXA-51-like ARF91818.1 | A.b. | FAYKLANKTLPFS | QKVD | DEVQSM | LFIEEKNGNKIYA   | KSG | WGVDVN | POVGWLTG | WVVPQG |
| OXA-51-like ARF95229.1 | A.b. | FAYKLANKTLPFS | QKVD | DEVQSM | LFIEEKNGNKIYA   | KSG | WGVDVN | POVGWLTG | WVVPQG |
| OXA-51-like ARG04169.1 | A.b. | FAYKLANKTLPFS | QKVD | DEVQSM | LFIEEKNGNKIYA   | KSG | WGVDVN | POVGWLTG | WVVPQG |
| OXA-51-like ARG09260.1 | A.b. | FAYKLANKTLPFS | QKVD | DEVQSM | LFIEEKNGNKIYA   | KSG | WGVDVN | POVGWLTG | WVVPQG |
| OXA-51-like ARG14122.1 | A.b. | FAYKLANKTLPFS | QKVD | DEVQSM | LFIEEKNGNKIYA   | KSG | WGVDVN | POVGWLTG | WVVPQG |
| OXA-51-like ARG20812.1 | A.b. | FAYKLANKTLPFS | QKVD | DEVQSM | LFIEEKNGNKIYA   | KSG | WGVDVN | POVGWLTG | WVVPQG |
| OXA-51-like ARG26815.1 | A.b. | FAYKLANKTLPFS | QKVD | DEVQSM | LFIEEKNGNKIYA   | KSG | WGVDVN | POVGWLTG | WVVPQG |
| OXA-51-like ATR88137.1 | A.b. | FAYKLANKTLPFS | QKVD | DEVQSM | LFIEEKNGNKIYA   | KSG | WGVDVN | POVGWLTG | WVVPQG |
| OXA-51-like ATU22923.1 | A.b. | FAYKLANKTLPFS | QKVD | DEVQSM | LFIEEKNGNKIYA   | KSG | WGVDVN | POVGWLTG | WVVPQG |
| OXA-51-like AUG11400.1 | A.b. | FAYKLANKTLPFS | QKVD | DEVQSM | LFIEEKNGNKIYA</ |     |        |          |        |

acc

OXA-51-like subfamily

4ZDX\_Beta-lactamase

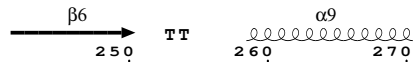

4ZDX\_Beta-lactamase

OXA-51-like QLB35675.1 1 A b  
OXA-51-like AUT37227 1 A b  
OXA-51-like QJF39460 1 A b  
OXA-51-like QL140100 1 A b  
OXA-51-like ARG36573 1 A b  
OXA-51-like ASO71619 1 A b  
OXA-51-like AVP34890 1 A b  
OXA-51-like QCR89674 1 A b  
OXA-51-like QJH20957 1 A b  
OXA-51-like QMS82274 1 A b  
OXA-51-like QCT16238 1 A b  
OXA-51-like AVF07049 1 A b  
OXA-51-like AVF08644 1 A b  
OXA-51-like QBR77846 1 A b  
OXA-51-like QBR79997 1 A b  
OXA-51-like ABO11944 2 A b  
OXA-51-like ABG35408 1 A b  
OXA-51-like BBT49379 1 A b  
OXA-51-like QAB40708 1 A b  
OXA-51-like QDQ60454 1 A b  
OXA-51-like QKY23678 1 A b  
OXA-51-like QLI36478 1 A b  
OXA-51-like QNT82744 1 A b  
OXA-51-like APX50552 1 A b  
OXA-51-like QER37219 1 A b  
OXA-51-like QLF06531 1 A b  
OXA-51-like AGQ06390 1 A b  
OXA-51-like QCP28577 1 A b  
OXA-51-like AIY37715 2 A b  
OXA-51-like APO58833 1 A b  
OXA-51-like APX48643 1 A b  
OXA-51-like QBY14110 1 A b  
OXA-51-like QCP23393 1 A b  
OXA-51-like QJG76604 1 A b  
OXA-51-like QJG80512 1 A b  
OXA-51-like QJG83258 1 A b  
OXA-51-like QJF37521 1 A b  
OXA-51-like ARG37991 1 A b  
OXA-51-like ANM01331 1 A b  
OXA-51-like ARN31023 1 A b  
OXA-51-like QDM66466 1 A b  
OXA-51-like QEY04089 1 A b  
OXA-51-like QFQ05250 1 A b  
OXA-51-like QGX51318 1 A b  
OXA-51-like QPP12630 1 A b  
OXA-51-like QNT83403 1 A b  
OXA-51-like QPF14787 1 A b  
OXA-51-like QJF32440 1 A b  
OXA-51-like QJF35790 1 A b  
OXA-51-like QLF10281 1 A b  
OXA-51-like AYY52683 1 A b  
OXA-51-like SCD15761 1 A b  
OXA-51-like BAP66909 1 A b  
OXA-51-like QCP30880 1 A b  
OXA-51-like QRF75560 1 A b  
OXA-51-like QC080718 1 A b  
OXA-51-like QCD18717 1 A b  
OXA-51-like QCD22484 1 A b  
OXA-51-like QRN22730 1 A b  
OXA-51-like QRN17816 1 A b  
OXA-51-like QRN09142 1 A b  
OXA-51-like QRN14361 1 A b  
OXA-51-like AHB91645 1 A b  
OXA-51-like QE176099 1 A b  
OXA-51-like QBY88347 1 A b  
OXA-51-like ANC35117 1 A b  
OXA-51-like APV19826 1 A b  
OXA-51-like AVE55122 1 A b  
OXA-51-like AV092126 1 A b  
OXA-51-like AEG84775 1 A b  
OXA-51-like AXX40472 1 A b  
OXA-51-like AYY89494 1 A b  
OXA-51-like QFH45392 1 A b  
OXA-51-like QFY69235 1 A b  
OXA-51-like QJF27678 1 A b  
OXA-51-like AML74598 1 A b  
OXA-51-like AOP62964 1 A b  
OXA-51-like AFU38004 1 A b  
OXA-51-like AML67359 1 A b  
OXA-51-like AML71041 1 A b  
OXA-51-like AML63873 1 A b  
OXA-51-like QKR74898 1 A b  
OXA-51-like QFX70271 1 A b  
OXA-51-like QE6K7468 1 A b  
OXA-51-like QEK74707 1 A b  
OXA-51-like QEK71081 1 A b  
OXA-51-like QFZ58831 1 A b  
OXA-51-like QAS47153 1 A b  
OXA-51-like QAS43533 1 A b  
OXA-51-like QNV16375 1 A b  
OXA-51-like QNV20321 1 A b  
OXA-51-like QNV24005 1 A b  
OXA-51-like QNV27835 1 A b  
OXA-51-like QNV31585 1 A b  
OXA-51-like QPN98293 1 A b  
OXA-51-like QPO01798 1 A b  
OXA-51-like QDQ93954 1 A b  
OXA-51-like QDQ94685 1 A b  
OXA-51-like QDQ98482 1 A b  
OXA-51-like QQB02276 1 A b  
OXA-51-like SBS22256 1 A b  
OXA-51-like AEP06182 1 A b

[illegible]

OXA-51-like subfamily

|                        |     |                |          |                |
|------------------------|-----|----------------|----------|----------------|
| OXA-51-like_ARG02295.1 | A.b | NIVAFSLNLEMKKG | IPSSVRKE | TYKKSLEQLGIL   |
| OXA-51-like_ARG25110.1 | A.b | NIVAFSLNLEMKKG | IPSSVRKE | TYKKSLEQLGIL   |
| OXA-51-like_AYC01674.1 | A.b | NIVAFSLNLEMKKG | IPSSVRKE | TYKKSLEQLGIL   |
| OXA-51-like_ATU49292.1 | A.b | NIVAFSLNLEMKKG | IPSSVRKE | TYKKSLEQLGIL   |
| OXA-51-like_ATU52990.1 | A.b | NIVAFSLNLEMKKG | IPSSVRKE | TYKKSLEQLGIL   |
| OXA-51-like_ATU56628.1 | A.b | NIVAFSLNLEMKKG | IPSSVRKE | TYKKSLEQLGIL   |
| OXA-51-like_AZK38077.1 | A.b | NIVAFSLNLEMKKG | IPSSVRKE | TYKKSLEQLGIL   |
| OXA-51-like_AZK41733.1 | A.b | NIVAFSLNLEMKKG | IPSSVRKE | TYKKSLEQLGIL   |
| OXA-51-like_QAS39909.1 | A.b | NIVAFSLNLEMKKG | IPSSVRKE | TYKKSLEQLGIL   |
| OXA-51-like_QAS33473.1 | A.b | NIVAFSLNLEMKKG | IPSSVRKE | TYKKSLEQLGIL   |
| OXA-51-like_ACC56872.1 | A.b | NIVAFSLNLEMKKG | IPSSVRKE | TYKKSLEQLGIL   |
| OXA-51-like_ADX91666.1 | A.b | NIVAFSLNLEMKKG | IPSSVRKE | TYKKSLEQLGIL   |
| OXA-51-like_ADX92178.1 | A.b | NIVAFSLNLEMKKG | IPSSVRKE | TYKKSLEQLGIL   |
| OXA-51-like_AQO10228.1 | A.b | NIVAFSLNLEMKKG | IPSSVRKE | TYKKSLEQLGIL   |
| OXA-51-like_ALX99780.1 | A.b | NIVAFSLNLEMKKG | IPSSVRKE | TYKKSLEQLGIL   |
| OXA-51-like_AMC15222.1 | A.b | NIVAFSLNLEMKKG | IPSSVRKE | TYKKSLEQLGIL   |
| OXA-51-like_ANB89875.1 | A.b | NIVAFSLNLEMKKG | IPSSVRKE | TYKKSLEQLGIL   |
| OXA-51-like_AOX69607.1 | A.b | NIVAFSLNLEMKKG | IPSSVRKE | TYKKSLEQLGIL   |
| OXA-51-like_AOX73369.1 | A.b | NIVAFSLNLEMKKG | IPSSVRKE | TYKKSLEQLGIL   |
| OXA-51-like_AOX77482.1 | A.b | NIVAFSLNLEMKKG | IPSSVRKE | TYKKSLEQLGIL   |
| OXA-51-like_AOX81661.1 | A.b | NIVAFSLNLEMKKG | IPSSVRKE | TYKKSLEQLGIL   |
| OXA-51-like_AOX85074.1 | A.b | NIVAFSLNLEMKKG | IPSSVRKE | TYKKSLEQLGIL   |
| OXA-51-like_AOX88942.1 | A.b | NIVAFSLNLEMKKG | IPSSVRKE | TYKKSLEQLGIL   |
| OXA-51-like_AOX92779.1 | A.b | NIVAFSLNLEMKKG | IPSSVRKE | TYKKSLEQLGIL   |
| OXA-51-like_AOX96637.1 | A.b | NIVAFSLNLEMKKG | IPSSVRKE | TYKKSLEQLGIL   |
| OXA-51-like_APF43961.1 | A.b | NIVAFSLNLEMKKG | IPSSVRKE | TYKKSLEQLGIL   |
| OXA-51-like_APJ23527.1 | A.b | NIVAFSLNLEMKKG | IPSSVRKE | TYKKSLEQLGIL   |
| OXA-51-like_APM48724.1 | A.b | NIVAFSLNLEMKKG | IPSSVRKE | TYKKSLEQLGIL   |
| OXA-51-like_APQ85553.1 | A.b | NIVAFSLNLEMKKG | IPSSVRKE | TYKKSLEQLGIL   |
| OXA-51-like_APQ93188.1 | A.b | NIVAFSLNLEMKKG | IPSSVRKE | TYKKSLEQLGIL   |
| OXA-51-like_AQU55455.1 | A.b | NIVAFSLNLEMKKG | IPSSVRKE | TYKKSLEQLGIL   |
| OXA-51-like_ARF91818.1 | A.b | NIVAFSLNLEMKKG | IPSSVRKE | TYKKSLEQLGIL   |
| OXA-51-like_ARF95229.1 | A.b | NIVAFSLNLEMKKG | IPSSVRKE | TYKKSLEQLGIL   |
| OXA-51-like_ARG04169.1 | A.b | NIVAFSLNLEMKKG | IPSSVRKE | TYKKSLEQLGIL   |
| OXA-51-like_ARG09260.1 | A.b | NIVAFSLNLEMKKG | IPSSVRKE | TYKKSLEQLGIL   |
| OXA-51-like_ARG14122.1 | A.b | NIVAFSLNLEMKKG | IPSSVRKE | TYKKSLEQLGIL   |
| OXA-51-like_ARG20812.1 | A.b | NIVAFSLNLEMKKG | IPSSVRKE | TYKKSLEQLGIL   |
| OXA-51-like_ARG26815.1 | A.b | NIVAFSLNLEMKKG | IPSSVRKE | TYKKSLEQLGIL   |
| OXA-51-like_ATR88137.1 | A.b | NIVAFSLNLEMKKG | IPSSVRKE | TYKKSLEQLGIL   |
| OXA-51-like_ATU22923.1 | A.b | NIVAFSLNLEMKKG | IPSSVRKE | TYKKSLEQLGIL   |
| OXA-51-like_AUG11400.1 | A.b | NIVAFSLNLEMKKG | IPSSVRKE | TYKKSLEQLGIL   |
| OXA-51-like_AVE45033.1 | A.b | NIVAFSLNLEMKKG | IPSSVRKE | TYKKSLEQLGIL   |
| OXA-51-like_AVE90526.1 | A.b | NIVAFSLNLEMKKG | IPSSVRKE | TYKKSLEQLGIL   |
| OXA-51-like_AVO88307.1 | A.b | NIVAFSLNLEMKKG | IPSSVRKE | TYKKSLEQLGIL   |
| OXA-51-like_AWO15631.1 | A.b | NIVAFSLNLEMKKG | IPSSVRKE | TYKKSLEQLGIL   |
| OXA-51-like_AWW77770.1 | A.b | NIVAFSLNLEMKKG | IPSSVRKE | TYKKSLEQLGIL   |
| OXA-51-like_AWW85353.1 | A.b | NIVAFSLNLEMKKG | IPSSVRKE | TYKKSLEQLGIL   |
| OXA-51-like_AXW91373.1 | A.b | NIVAFSLNLEMKKG | IPSSVRKE | TYKKSLEQLGIL   |
| OXA-51-like_AXX48901.1 | A.b | NIVAFSLNLEMKKG | IPSSVRKE | TYKKSLEQLGIL   |
| OXA-51-like_AXX55862.1 | A.b | NIVAFSLNLEMKKG | IPSSVRKE | TYKKSLEQLGIL   |
| OXA-51-like_QBA07478.1 | A.b | NIVAFSLNLEMKKG | IPSSVRKE | TYKKSLEQLGIL   |
| OXA-51-like_QBB77223.1 | A.b | NIVAFSLNLEMKKG | IPSSVRKE | TYKKSLEQLGIL   |
| OXA-51-like_QCH33275.1 | A.b | NIVAFSLNLEMKKG | IPSSVRKE | TYKKSLEQLGIL   |
| OXA-51-like_QCP15970.1 | A.b | NIVAFSLNLEMKKG | IPSSVRKE | TYKKSLEQLGIL   |
| OXA-51-like_QCP19079.1 | A.b | NIVAFSLNLEMKKG | IPSSVRKE | TYKKSLEQLGIL   |
| OXA-51-like_QCP45479.1 | A.b | NIVAFSLNLEMKKG | IPSSVRKE | TYKKSLEQLGIL   |
| OXA-51-like_QDR93660.1 | A.b | NIVAFSLNLEMKKG | IPSSVRKE | TYKKSLEQLGIL   |
| OXA-51-like_QEY27958.1 | A.b | NIVAFSLNLEMKKG | IPSSVRKE | TYKKSLEQLGIL   |
| OXA-51-like_QIX30833.1 | A.b | NIVAFSLNLEMKKG | IPSSVRKE | TYKKSLEQLGIL   |
| OXA-51-like_QIX34674.1 | A.b | NIVAFSLNLEMKKG | IPSSVRKE | TYKKSLEQLGIL   |
| OXA-51-like_QIX38631.1 | A.b | NIVAFSLNLEMKKG | IPSSVRKE | TYKKSLEQLGIL   |
| OXA-51-like_QIX42205.1 | A.b | NIVAFSLNLEMKKG | IPSSVRKE | TYKKSLEQLGIL   |
| OXA-51-like_QTX46166.1 | A.b | NIVAFSLNLEMKKG | IPSSVRKE | TYKKSLEQLGIL   |
| OXA-51-like_QJG69125.1 | A.b | NIVAFSLNLEMKKG | IPSSVRKE | TYKKSLEQLGIL   |
| OXA-51-like_QJG72958.1 | A.b | NIVAFSLNLEMKKG | IPSSVRKE | TYKKSLEQLGIL</ |

*acc*



# OXA-58-like subfamily

4OH0\_OXA-58-like\_A.b.

4OH0\_OXA-58-like\_A.b.  
OXA-58-like\_ANC38777.1 A.b.  
OXA-58-like\_AXW92580.1 A.b.  
OXA-58-like\_AVE88633.1 A.b.  
OXA-58-like\_AVN12783.1 A.b.  
OXA-58-like\_QBY16302.1 A.b.  
OXA-58-like\_QMS84120.1 A.b.  
OXA-58-like\_QJP39652.1 A.b.  
OXA-58-like\_QJF29755.1 A.b.  
OXA-58-like\_QOJ62286.1 A.b.  
OXA-58-like\_QNB01599.1 A.b.  
OXA-58-like\_QBY91612.1 A.b.  
OXA-58-like\_QFH47329.1 A.b.  
OXA-58-like\_AXB17680.1 A.b.

acc

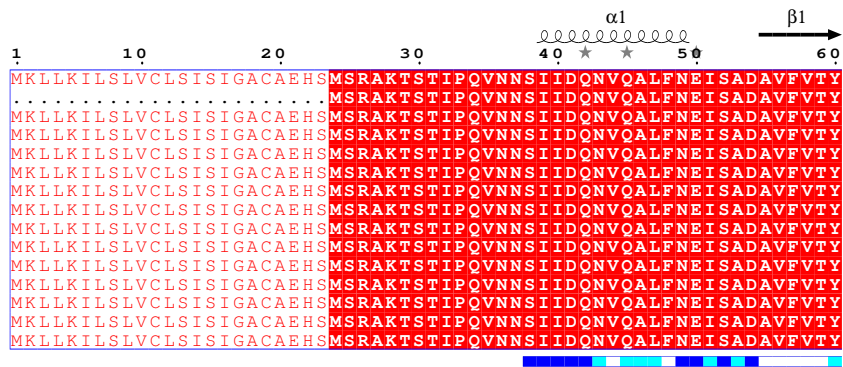

4OH0\_OXA-58-like\_A.b.

4OH0\_OXA-58-like\_A.b.  
OXA-58-like\_ANC38777.1 A.b.  
OXA-58-like\_AXW92580.1 A.b.  
OXA-58-like\_AVE88633.1 A.b.  
OXA-58-like\_AVN12783.1 A.b.  
OXA-58-like\_QBY16302.1 A.b.  
OXA-58-like\_QMS84120.1 A.b.  
OXA-58-like\_QJP39652.1 A.b.  
OXA-58-like\_QJF29755.1 A.b.  
OXA-58-like\_QOJ62286.1 A.b.  
OXA-58-like\_QNB01599.1 A.b.  
OXA-58-like\_QBY91612.1 A.b.  
OXA-58-like\_QJF41203.1 A.b.  
OXA-58-like\_QFH47329.1 A.b.  
OXA-58-like\_AXB17680.1 A.b.

acc

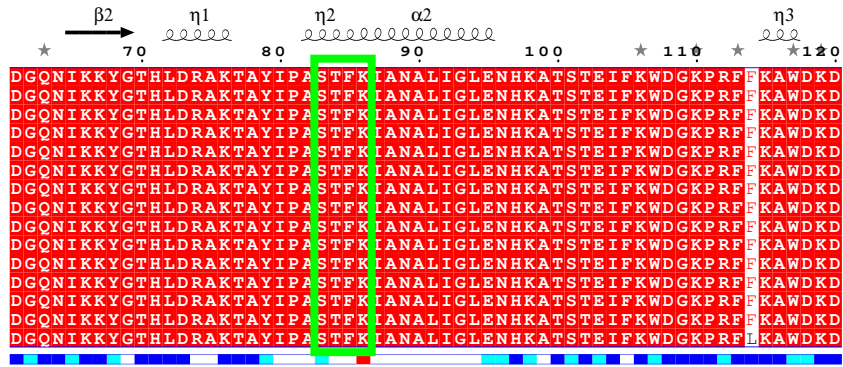

4OH0\_OXA-58-like\_A.b.

4OH0\_OXA-58-like\_A.b.  
OXA-58-like\_ANC38777.1 A.b.  
OXA-58-like\_AXW92580.1 A.b.  
OXA-58-like\_AVE88633.1 A.b.  
OXA-58-like\_AVN12783.1 A.b.  
OXA-58-like\_QBY16302.1 A.b.  
OXA-58-like\_QMS84120.1 A.b.  
OXA-58-like\_QJP39652.1 A.b.  
OXA-58-like\_QJF29755.1 A.b.  
OXA-58-like\_QOJ62286.1 A.b.  
OXA-58-like\_QNB01599.1 A.b.  
OXA-58-like\_QBY91612.1 A.b.  
OXA-58-like\_QJF41203.1 A.b.  
OXA-58-like\_QFH47329.1 A.b.  
OXA-58-like\_AXB17680.1 A.b.

acc

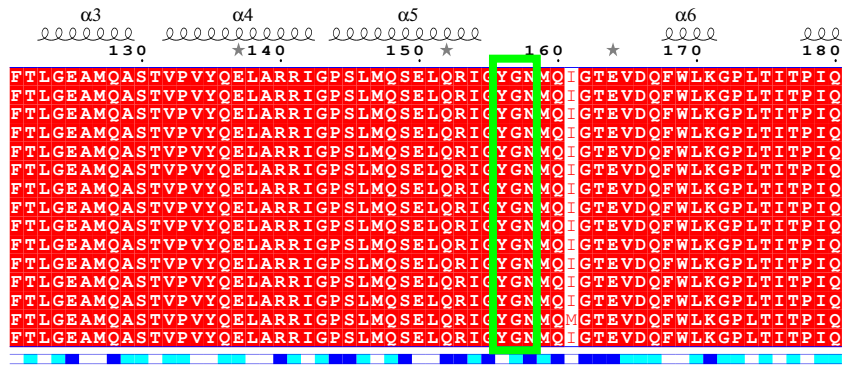

4OH0\_OXA-58-like\_A.b.

4OH0\_OXA-58-like\_A.b.  
OXA-58-like\_ANC38777.1 A.b.  
OXA-58-like\_AXW92580.1 A.b.  
OXA-58-like\_AVE88633.1 A.b.  
OXA-58-like\_AVN12783.1 A.b.  
OXA-58-like\_QBY16302.1 A.b.  
OXA-58-like\_QMS84120.1 A.b.  
OXA-58-like\_QJP39652.1 A.b.  
OXA-58-like\_QJF29755.1 A.b.  
OXA-58-like\_QOJ62286.1 A.b.  
OXA-58-like\_QNB01599.1 A.b.  
OXA-58-like\_QBY91612.1 A.b.  
OXA-58-like\_QJF41203.1 A.b.  
OXA-58-like\_QFH47329.1 A.b.  
OXA-58-like\_AXB17680.1 A.b.

acc

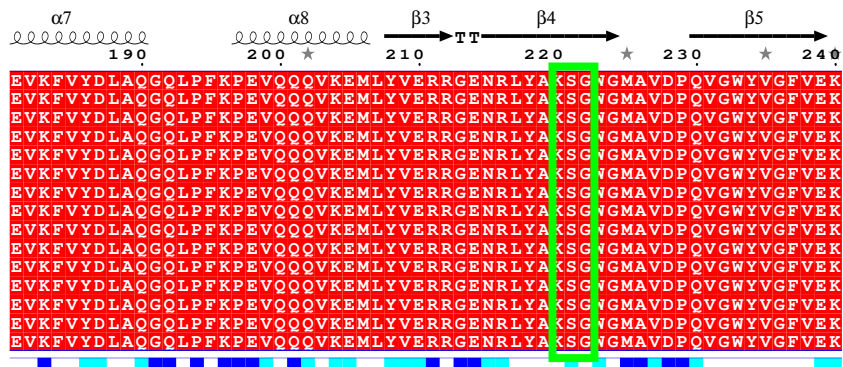

4OH0\_OXA-58-like\_A.b.

4OH0\_OXA-58-like\_A.b.  
OXA-58-like\_ANC38777.1 A.b.  
OXA-58-like\_AXW92580.1 A.b.  
OXA-58-like\_AVE88633.1 A.b.  
OXA-58-like\_AVN12783.1 A.b.  
OXA-58-like\_QBY16302.1 A.b.  
OXA-58-like\_QMS84120.1 A.b.  
OXA-58-like\_QJP39652.1 A.b.  
OXA-58-like\_QJF29755.1 A.b.  
OXA-58-like\_QOJ62286.1 A.b.  
OXA-58-like\_QNB01599.1 A.b.  
OXA-58-like\_QBY91612.1 A.b.  
OXA-58-like\_QJF41203.1 A.b.  
OXA-58-like\_QFH47329.1 A.b.  
OXA-58-like\_AXB17680.1 A.b.

acc

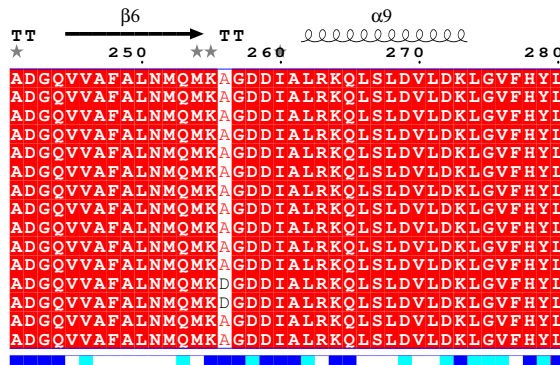

# OXA-134-like subfamily

OXA-134-like\_AZK43007.1\_A.b.

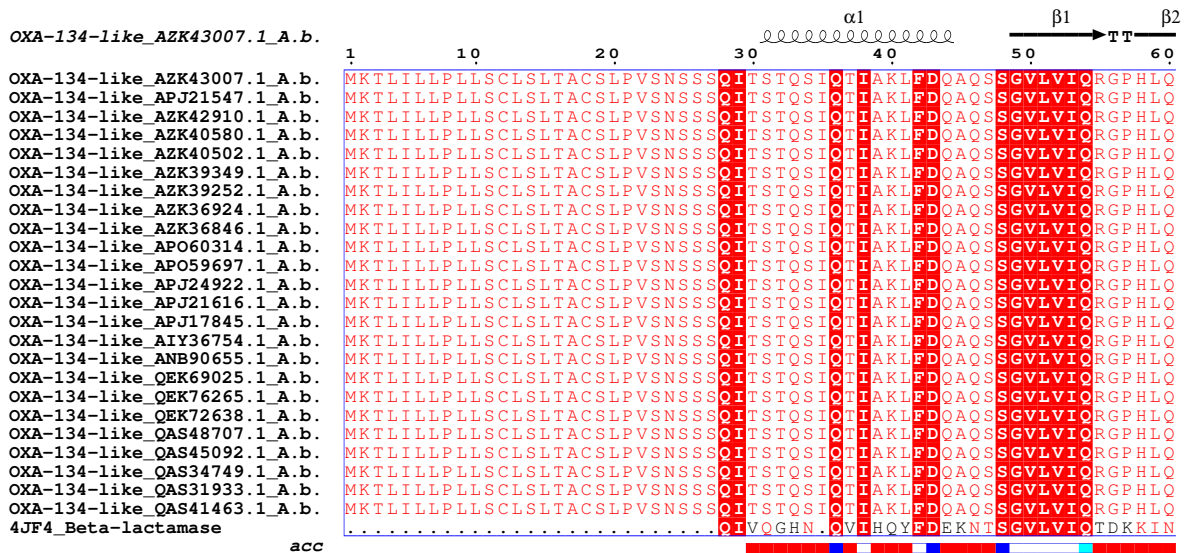

OXA-134-like\_AZK43007.1\_A.b.

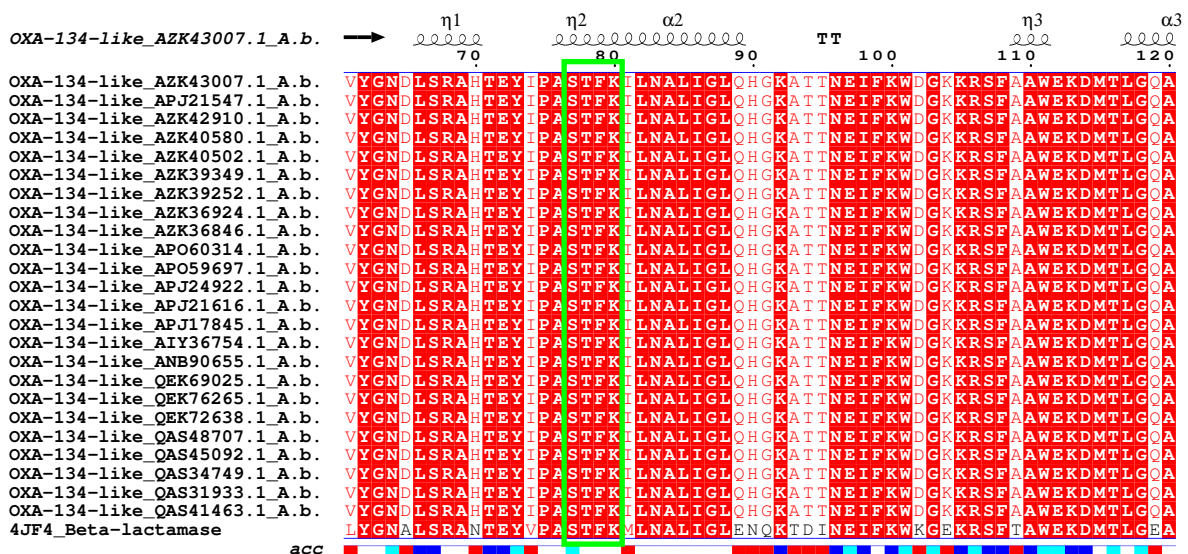

OXA-134-like\_AZK43007.1\_A.b.

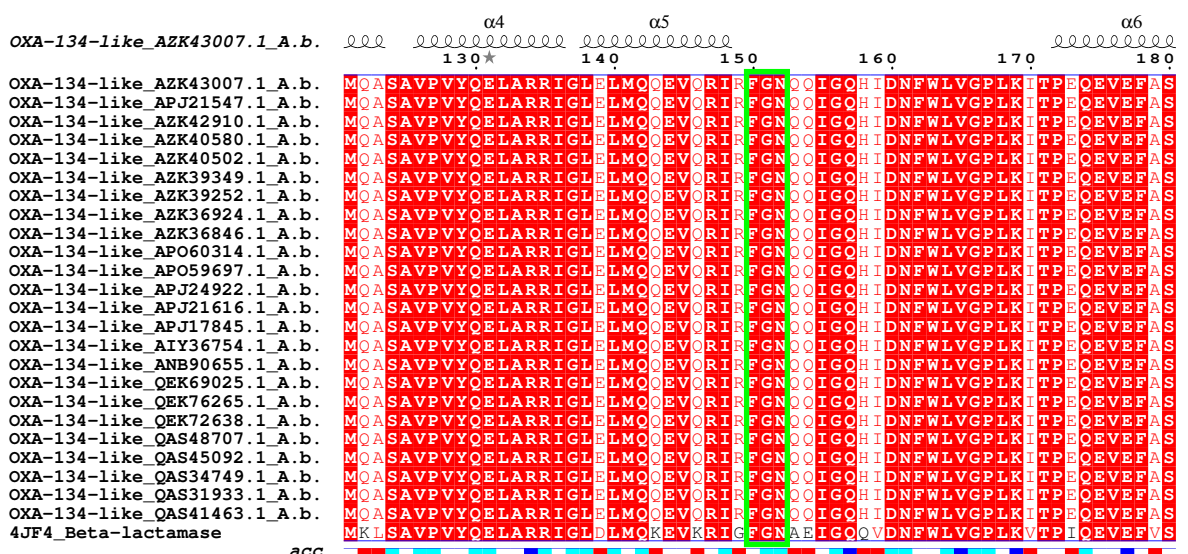

# OXA-134-like subfamily

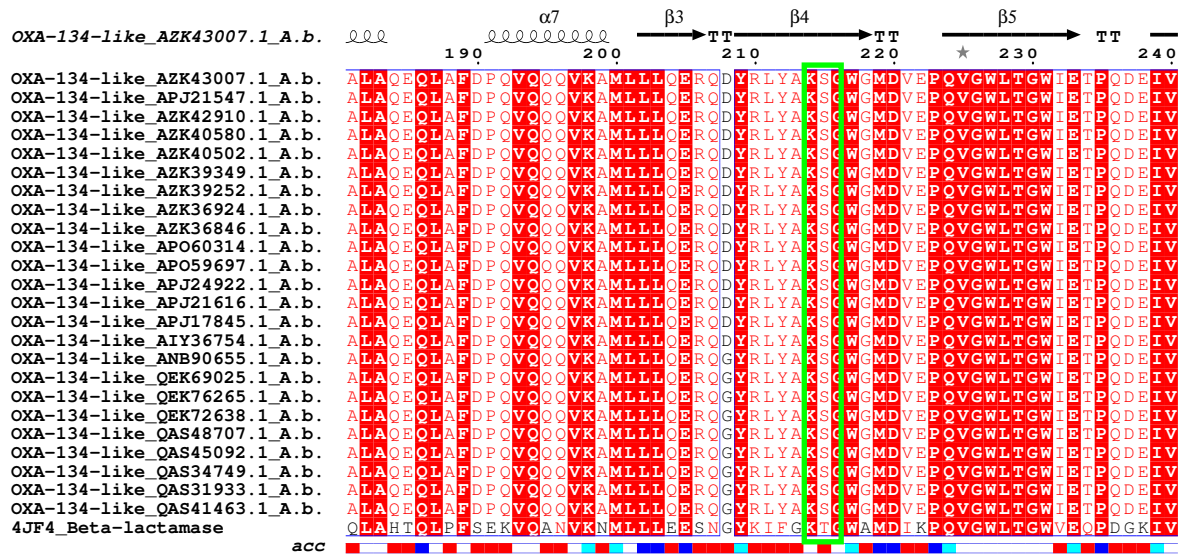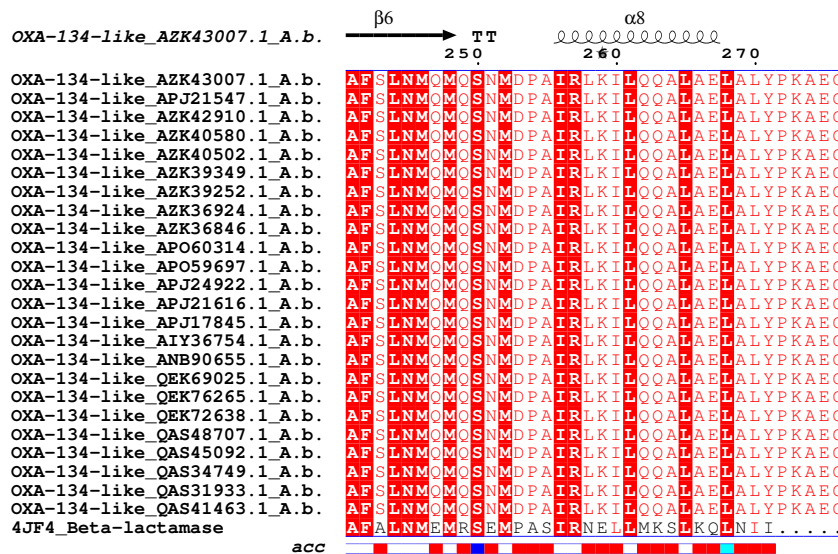



# OXA-213-like subfamily

4ZDX\_1\_Beta-lactamase

4ZDX\_1\_Beta-lactamase

OXA-213-like\_QLF06531.1\_A.b.

OXA-213-like\_QNB02485.1\_A.b.

acc

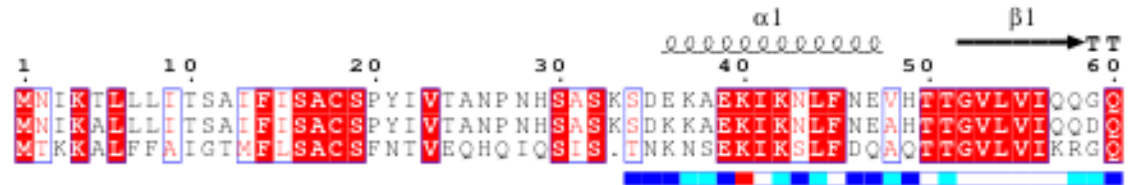

4ZDX\_1\_Beta-lactamase

4ZDX\_1\_Beta-lactamase

OXA-213-like\_QLF06531.1\_A.b.

OXA-213-like\_QNB02485.1\_A.b.

acc

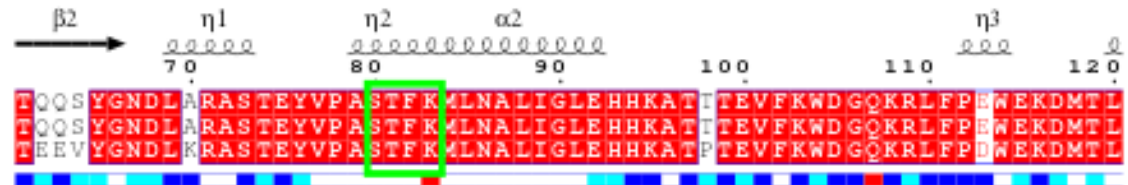

4ZDX\_1\_Beta-lactamase

4ZDX\_1\_Beta-lactamase

OXA-213-like\_QLF06531.1\_A.b.

OXA-213-like\_QNB02485.1\_A.b.

acc

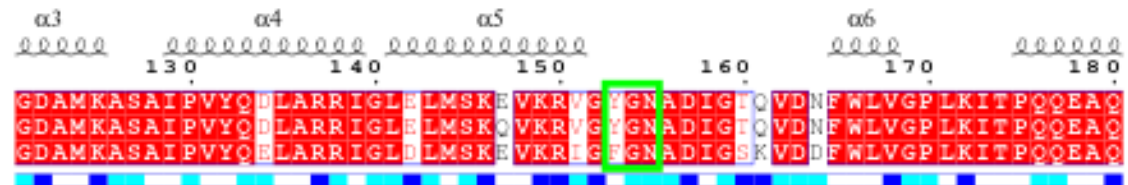

4ZDX\_1\_Beta-lactamase

4ZDX\_1\_Beta-lactamase

OXA-213-like\_QLF06531.1\_A.b.

OXA-213-like\_QNB02485.1\_A.b.

acc

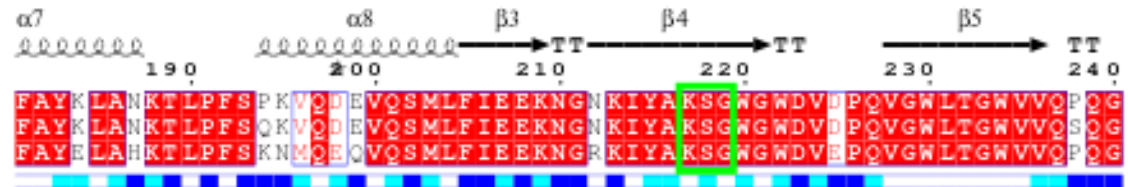

4ZDX\_1\_Beta-lactamase

4ZDX\_1\_Beta-lactamase

OXA-213-like\_QLF06531.1\_A.b.

OXA-213-like\_QNB02485.1\_A.b.

acc

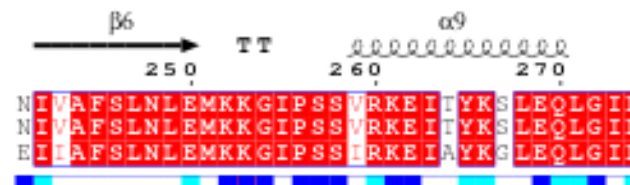

$\beta_1 \rightarrow \eta_1 \alpha_1$  (30) (40)  $\beta_2 \rightarrow$  (50)  $\beta_3 \rightarrow \alpha_2$  (60)

OXA-48-like\_QRC22072.1\_K.p.  
OXA-48-like\_ASG42064.1\_E.spp.  
OXA-48-like\_QRC13711.1\_K.p.  
OXA-48-like\_VAY01821.1\_K.p.  
OXA-48-like\_VAX91950.1\_K.p.  
OXA-48-like\_VAX91959.1\_K.p.  
OXA-48-like\_PXP62592.1\_K.p.  
OXA-48-like\_QOU38957.1\_K.p.  
OXA-48-like\_QOT97232.1\_K.p.  
OXA-48-like\_QL133314.1\_K.p.  
OXA-48-like\_QLT27956.1\_K.p.  
OXA-48-like\_QLT22474.1\_K.p.  
OXA-48-like\_QLC16065.1\_K.p.  
OXA-48-like\_QLC05848.1\_K.p.  
OXA-48-like\_QLC00099.1\_K.p.  
OXA-48-like\_QLB94822.1\_K.p.  
OXA-48-like\_QLB89481.1\_K.p.  
OXA-48-like\_QLB84144.1\_K.p.  
OXA-48-like\_QLB78805.1\_K.p.  
OXA-48-like\_QLB73478.1\_K.p.  
OXA-48-like\_QI273388.1\_K.p.  
OXA-48-like\_QI17785.1\_K.p.  
OXA-48-like\_QND07059.1\_K.p.  
OXA-48-like\_QET21519.1\_K.p.  
OXA-48-like\_QCS89961.1\_K.p.  
OXA-48-like\_QCT00720.1\_K.p.  
OXA-48-like\_QDF35925.1\_K.p.  
OXA-48-like\_AZJ02288.1\_K.p.  
OXA-48-like\_AZJ07598.1\_K.p.  
OXA-48-like\_AZS22630.1\_K.p.  
OXA-48-like\_AXS22834.1\_K.p.  
OXA-48-like\_AXR54472.1\_K.p.  
OXA-48-like\_AWR57773.1\_K.p.  
OXA-48-like\_ART03415.1\_K.p.  
OXA-48-like\_ART03346.1\_K.p.  
OXA-48-like\_APQ28988.1\_K.p.  
OXA-48-like\_APP73786.1\_K.p.  
OXA-48-like\_APP67917.1\_K.p.  
OXA-48-like\_APP56266.1\_K.p.  
OXA-48-like\_APP50376.1\_K.p.  
OXA-48-like\_APP44504.1\_K.p.  
OXA-48-like\_APP38728.1\_K.p.  
OXA-48-like\_APM79240.1\_K.p.  
OXA-48-like\_APM37588.1\_K.p.  
OXA-48-like\_APM67987.1\_K.p.  
OXA-48-like\_APM62354.1\_K.p.  
OXA-48-like\_APM47124.1\_K.p.  
OXA-48-like\_APG80363.1\_K.p.  
OXA-48-like\_AOF13070.1\_K.p.  
OXA-48-like\_QPQ02212.1\_K.p.  
OXA-48-like\_PPQ02194.1\_K.p.  
OXA-48-like\_QI134285.1\_K.p.  
OXA-48-like\_QI1J09605.1\_K.p.  
OXA-48-like\_QIR58822.1\_K.p.  
5OE0\_1\_Beta-lactamase  
OXA-48-like\_ANE69785.1\_K.p.  
OXA-48-like\_ANE71804.1\_K.p.  
OXA-48-like\_ANE72730.1\_K.p.  
OXA-48-like\_AOA98603.1\_K.p.  
OXA-48-like\_CEP69754.1\_K.p.  
OXA-48-like\_CEP70686.1\_K.p.  
OXA-48-like\_CEP72746.1\_K.p.  
OXA-48-like\_ATX28768.1\_K.p.  
OXA-48-like\_ATX29640.1\_K.p.  
OXA-48-like\_AV014768.1\_K.p.  
OXA-48-like\_AV015618.1\_K.p.  
OXA-48-like\_AWD00385.1\_K.p.  
OXA-48-like\_AWD98100.1\_K.p.  
OXA-48-like\_AWS85277.1\_K.p.  
OXA-48-like\_OEG84876.1\_K.p.  
OXA-48-like\_QIR47572.1\_K.p.  
OXA-48-like\_QIR53202.1\_K.p.  
OXA-48-like\_QO50577.1\_K.p.  
OXA-48-like\_BB098227.1\_K.p.  
OXA-48-like\_BB099129.1\_K.p.  
OXA-48-like\_QDE47101.1\_E.spp.  
OXA-48-like\_OIG86783.1\_K.p.  
OXA-48-like\_ALH88756.1\_K.p.  
OXA-48-like\_AOF02466.1\_K.p.  
OXA-48-like\_AOT26616.1\_K.p.  
OXA-48-like\_AZB79861.1\_K.p.  
OXA-48-like\_AZV17592.1\_K.p.  
OXA-48-like\_QBG05392.1\_K.p.  
OXA-48-like\_QBH46740.1\_K.p.  
OXA-48-like\_QBG61269.1\_K.p.  
OXA-48-like\_QLF61798.1\_K.p.  
OXA-48-like\_QLF61822.1\_K.p.

|   |    |    |    |    |    |    |   |   |   |   |   |   |   |   |   |   |   |   |   |   |   |   |   |   |   |   |   |   |   |   |   |   |   |   |   |   |   |   |   |   |   |   |   |   |   |   |   |   |   |   |   |   |   |   |   |   |   |
|---|----|----|----|----|----|----|---|---|---|---|---|---|---|---|---|---|---|---|---|---|---|---|---|---|---|---|---|---|---|---|---|---|---|---|---|---|---|---|---|---|---|---|---|---|---|---|---|---|---|---|---|---|---|---|---|---|---|
|   | 10 | 20 | 30 | 40 | 50 | 60 |   |   |   |   |   |   |   |   |   |   |   |   |   |   |   |   |   |   |   |   |   |   |   |   |   |   |   |   |   |   |   |   |   |   |   |   |   |   |   |   |   |   |   |   |   |   |   |   |   |   |   |
| M | R  | V  | L  | A  | S  | A  | V | F | L | V | A | S | I | G | M | P | A | V | A | K | E | W | Q | E | N | K | S | W | N | A | H | F | T | E | H | K | S | Q | G | V | V | V | L | W | N | E | N | K | O | O | G | F | T | N | N | L | K |
| M | R  | V  | L  | A  | S  | A  | V | F | L | V | A | S | I | G | M | P | A | V | A | K | E | W | Q | E | N | K | S | W | N | A | H | F | T | E | H | K | S | Q | G | V | V | V | L | W | N | E | N | K | O | O | G | F | T | N | N | L | K |
| M | R  | V  | L  | A  | S  | A  | V | F | L | V | A | S | I | G | M | P | A | V | A | K | E | W | Q | E | N | K | S | W | N | A | H | F | T | E | H | K | S | Q | G | V | V | V | L | W | N | E | N | K | O | O | G | F | T | N | N | L | K |
| M | R  | V  | L  | A  | S  | A  | V | F | L | V | A | S | I | G | M | P | A | V | A | K | E | W | Q | E | N | K | S | W | N | A | H | F | T | E | H | K | S | Q | G | V | V | V | L | W | N | E | N | K | O | O | G | F | T | N | N | L | K |
| M | R  | V  | L  | A  | S  | A  | V | F | L | V | A | S | I | G | M | P | A | V | A | K | E | W | Q | E | N | K | S | W | N | A | H | F | T | E | H | K | S | Q | G | V | V | V | L | W | N | E | N | K | O | O | G | F | T | N | N | L | K |
| M | R  | V  | L  | A  | S  | A  | V | F | L | V | A | S | I | G | M | P | A | V | A | K | E | W | Q | E | N | K | S | W | N | A | H | F | T | E | H | K | S | Q | G | V | V | V | L | W | N | E | N | K | O | O | G | F | T | N | N | L | K |
| M | R  | V  | L  | A  | S  | A  | V | F | L | V | A | S | I | G | M | P | A | V | A | K | E | W | Q | E | N | K | S | W | N | A | H | F | T | E | H | K | S | Q | G | V | V | V | L | W | N | E | N | K | O | O | G | F | T | N | N | L | K |
| M | R  | V  | L  | A  | S  | A  | V | F | L | V | A | S | I | G | M | P | A | V | A | K | E | W | Q | E | N | K | S | W | N | A | H | F | T | E | H | K | S | Q | G | V | V | V | L | W | N | E | N | K | O | O | G | F | T | N | N | L | K |
| M | R  | V  | L  | A  | S  | A  | V | F | L | V | A | S | I | G | M | P | A | V | A | K | E | W | Q | E | N | K | S | W | N | A | H | F | T | E | H | K | S | Q | G | V | V | V | L | W | N | E | N | K | O | O | G | F | T | N | N | L | K |
| M | R  | V  | L  | A  | S  | A  | V | F | L | V | A | S | I | G | M | P | A | V | A | K | E | W | Q | E | N | K | S | W | N | A | H | F | T | E | H | K | S | Q | G | V | V | V | L | W | N | E | N | K | O | O | G | F | T | N | N | L | K |
| M | R  | V  | L  | A  | S  | A  | V | F | L | V | A | S | I | G | M | P | A | V | A | K | E | W | Q | E | N | K | S | W | N | A | H | F | T | E | H | K | S | Q | G | V | V | V | L | W | N | E | N | K | O | O | G | F | T | N | N | L | K |
| M | R  | V  | L  | A  | S  | A  | V | F | L | V | A | S | I | G | M | P | A | V | A | K | E | W | Q | E | N | K | S | W | N | A | H | F | T | E | H | K | S | Q | G | V | V | V | L | W | N | E | N | K | O | O | G | F | T | N | N | L | K |
| M | R  | V  | L  | A  | S  | A  | V | F | L | V | A | S | I | G | M | P | A | V | A | K | E | W | Q | E | N | K | S | W | N | A | H | F | T | E | H | K | S | Q | G | V | V | V | L | W | N | E | N | K | O | O | G | F | T | N | N | L | K |
| M | R  | V  | L  | A  | S  | A  | V | F | L | V | A | S | I | G | M | P | A | V | A | K | E | W | Q | E | N | K | S | W | N |   |   |   |   |   |   |   |   |   |   |   |   |   |   |   |   |   |   |   |   |   |   |   |   |   |   |   |   |

*acc*

## OXA-48-like subfamily

| OXA-48-like_QRC22072.1_K.p.   | η2     | α3    | TT    | η3    | α4    |
|-------------------------------|--------|-------|-------|-------|-------|
|                               | 70     | 80    | 90    | 100   | 110   |
| OXA-48-like_QRC22072.1_K.p.   | RANQAF | LPAST | FFKIP | NSLIA | LDLGV |
| OXA-48-like_ASG42064.1_E.spp. | RANQAF | LPAST | FFKIP | NSLIA | LDLGV |
| OXA-48-like_QRC13711.1_K.p.   | RANQAF | LPAST | FFKIP | NSLIA | LDLGV |
| OXA-48-like_VAX01821.1_K.p.   | RANQAF | LPAST | FFKIP | NSLIA | LDLGV |
| OXA-48-like_VAX91950.1_K.p.   | RANQAF | LPAST | FFKIP | NSLIA | LDLGV |
| OXA-48-like_VAX91959.1_K.p.   | RANQAF | LPAST | FFKIP | NSLIA | LDLGV |
| OXA-48-like_QPP62592.1_K.p.   | RANQAF | LPAST | FFKIP | NSLIA | LDLGV |
| OXA-48-like_QOU38957.1_K.p.   | RANQAF | LPAST | FFKIP | NSLIA | LDLGV |
| OXA-48-like_QOT97232.1_K.p.   | RANQAF | LPAST | FFKIP | NSLIA | LDLGV |
| OXA-48-like_QLI33314.1_K.p.   | RANQAF | LPAST | FFKIP | NSLIA | LDLGV |
| OXA-48-like_QLI27956.1_K.p.   | RANQAF | LPAST | FFKIP | NSLIA | LDLGV |
| OXA-48-like_QLI22474.1_K.p.   | RANQAF | LPAST | FFKIP | NSLIA | LDLGV |
| OXA-48-like_QLC16065.1_K.p.   | RANQAF | LPAST | FFKIP | NSLIA | LDLGV |
| OXA-48-like_QLC05384.1_K.p.   | RANQAF | LPAST | FFKIP | NSLIA | LDLGV |
| OXA-48-like_QLC00099.1_K.p.   | RANQAF | LPAST | FFKIP | NSLIA | LDLGV |
| OXA-48-like_QLB94822.1_K.p.   | RANQAF | LPAST | FFKIP | NSLIA | LDLGV |
| OXA-48-like_QLB89481.1_K.p.   | RANQAF | LPAST | FFKIP | NSLIA | LDLGV |
| OXA-48-like_QLB84144.1_K.p.   | RANQAF | LPAST | FFKIP | NSLIA | LDLGV |
| OXA-48-like_QLB78805.1_K.p.   | RANQAF | LPAST | FFKIP | NSLIA | LDLGV |
| OXA-48-like_QLB73478.1_K.p.   | RANQAF | LPAST | FFKIP | NSLIA | LDLGV |
| OXA-48-like_QI23388.1_K.p.    | RANQAF | LPAST | FFKIP | NSLIA | LDLGV |
| OXA-48-like_QI17785.1_K.p.    | RANQAF | LPAST | FFKIP | NSLIA | LDLGV |
| OXA-48-like_QND07059.1_K.p.   | RANQAF | LPAST | FFKIP | NSLIA | LDLGV |
| OXA-48-like_QET12150.1_K.p.   | RANQAF | LPAST | FFKIP | NSLIA | LDLGV |
| OXA-48-like_QCS89961.1_K.p.   | RANQAF | LPAST | FFKIP | NSLIA | LDLGV |
| OXA-48-like_QCT00720.1_K.p.   | RANQAF | LPAST | FFKIP | NSLIA | LDLGV |
| OXA-48-like_QDF35925.1_K.p.   | RANQAF | LPAST | FFKIP | NSLIA | LDLGV |
| OXA-48-like_AZJ02288.1_K.p.   | RANQAF | LPAST | FFKIP | NSLIA | LDLGV |
| OXA-48-like_AZJ07598.1_K.p.   | RANQAF | LPAST | FFKIP | NSLIA | LDLGV |
| OXA-48-like_AZJ24690.1_K.p.   | RANQAF | LPAST | FFKIP | NSLIA | LDLGV |
| OXA-48-like_AXS22834.1_K.p.   | RANQAF | LPAST | FFKIP | NSLIA | LDLGV |
| OXA-48-like_AXR54472.1_K.p.   | RANQAF | LPAST | FFKIP | NSLIA | LDLGV |
| OXA-48-like_AWR57773.1_K.p.   | RANQAF | LPAST | FFKIP | NSLIA | LDLGV |
| OXA-48-like_ART03415.1_K.p.   | RANQAF | LPAST | FFKIP | NSLIA | LDLGV |
| OXA-48-like_ART03346.1_K.p.   | RANQAF | LPAST | FFKIP | NSLIA | LDLGV |
| OXA-48-like_APQ28988.1_K.p.   | RANQAF | LPAST | FFKIP | NSLIA | LDLGV |
| OXA-48-like_APP73786.1_K.p.   | RANQAF | LPAST | FFKIP | NSLIA | LDLGV |
| OXA-48-like_APP67917.1_K.p.   | RANQAF | LPAST | FFKIP | NSLIA | LDLGV |
| OXA-48-like_APP56266.1_K.p.   | RANQAF | LPAST | FFKIP | NSLIA | LDLGV |
| OXA-48-like_APP50376.1_K.p.   | RANQAF | LPAST | FFKIP | NSLIA | LDLGV |
| OXA-48-like_APP44504.1_K.p.   | RANQAF | LPAST | FFKIP | NSLIA | LDLGV |
| OXA-48-like_APP38728.1_K.p.   | RANQAF | LPAST | FFKIP | NSLIA | LDLGV |
| OXA-48-like_APM79240.1_K.p.   | RANQAF | LPAST | FFKIP | NSLIA | LDLGV |
| OXA-48-like_APM73588.1_K.p.   | RANQAF | LPAST | FFKIP | NSLIA | LDLGV |
| OXA-48-like_APM67987.1_K.p.   | RANQAF | LPAST | FFKIP | NSLIA | LDLGV |
| OXA-48-like_APM62354.1_K.p.   | RANQAF | LPAST | FFKIP | NSLIA | LDLGV |
| OXA-48-like_APM47124.1_K.p.   | RANQAF | LPAST | FFKIP | NSLIA | LDLGV |
| OXA-48-like_APG80363.1_K.p.   | RANQAF | LPAST | FFKIP | NSLIA | LDLGV |
| OXA-48-like_AOF13070.1_K.p.   | RANQAF | LPAST | FFKIP | NSLIA | LDLGV |
| OXA-48-like_QPQ02212.1_K.p.   | RANQAF | LPAST | FFKIP | NSLIA | LDLGV |
| OXA-48-like_QPQ02194.1_K.p.   | RANQAF | LPAST | FFKIP | NSLIA | LDLGV |
| OXA-48-like_QI34285.1_K.p.    | RANQAF | LPAST | FFKIP | NSLIA | LDLGV |
| OXA-48-like_QI309605.1_K.p.   | RANQAF | LPAST | FFKIP | NSLIA | LDLGV |
| OXA-48-like_QIR58822.1_K.p.   | RANQAF | LPAST | FFKIP | NSLIA | LDLGV |
| 50E0.1_Beta-lactamase         | RANQAF | LPAST | FFKIP | NSLIA | LDLGV |
| OXA-48-like_ANE69785.1_K.p.   | RANQAF | LPAST | FFKIP | NSLIA | LDLGV |
| OXA-48-like_ANE71804.1_K.p.   | RANQAF | LPAST | FFKIP | NSLIA | LDLGV |
| OXA-48-like_ANE72730.1_K.p.   | RANQAF | LPAST | FFKIP | NSLIA | LDLGV |
| OXA-48-like_AOA98603.1_K.p.   | RANQAF | LPAST | FFKIP | NSLIA | LDLGV |
| OXA-48-like_CEP69754.1_K.p.   | RANQAF | LPAST | FFKIP | NSLIA | LDLGV |
| OXA-48-like_CEP70686.1_K.p.   | RANQAF | LPAST | FFKIP | NSLIA | LDLGV |
| OXA-48-like_CEP72746.1_K.p.   | RANQAF | LPAST | FFKIP | NSLIA | LDLGV |
| OXA-48-like_ATX28768.1_K.p.   | RANQAF | LPAST | FFKIP | NSLIA | LDLGV |
| OXA-48-like_ATX29640.1_K.p.   | RANQAF | LPAST | FFKIP | NSLIA | LDLGV |
| OXA-48-like_AVO14768.1_K.p.   | RANQAF | LPAST | FFKIP | NSLIA | LDLGV |
| OXA-48-like_AVO15618.1_K.p.   | RANQAF | LPAST | FFKIP | NSLIA | LDLGV |
| OXA-48-like_AWD00385.1_K.p.   | RANQAF | LPAST | FFKIP | NSLIA | LDLGV |
| OXA-48-like_AWD98100.1_K.p.   | RANQAF | LPAST | FFKIP | NSLIA | LDLGV |
| OXA-48-like_AWS85277.1_K.p.   | RANQAF | LPAST | FFKIP | NSLIA | LDLGV |
| OXA-48-like_QEG84876.1_K.p.   | RANQAF | LPAST | FFKIP | NSLIA | LDLGV |
| OXA-48-like_QIR47572.1_K.p.   | RANQAF | LPAST | FFKIP | NSLIA | LDLGV |
| OXA-48-like_QIR53202.1_K.p.   | RANQAF | LPAST | FFKIP | NSLIA | LDLGV |
| OXA-48-like_QQ050577.1_K.p.   | RANQAF | LPAST | FFKIP | NSLIA | LDLGV |
| OXA-48-like_BB098227.1_K.p.   | RANQAF | LPAST | FFKIP | NSLIA | LDLGV |
| OXA-48-like_BB099129.1_K.p.   | RANQAF | LPAST | FFKIP | NSLIA | LDLGV |
| OXA-48-like_QDE47101.1_E.spp. | RANQAF | LPAST | FFKIP | NSLIA | LDLGV |
| OXA-48-like_AIG86783.1_K.p.   | RANQAF | LPAST | FFKIP | NSLIA | LDLGV |
| OXA-48-like_ALH88756.1_K.p.   | RANQAF | LPAST | FFKIP | NSLIA | LDLGV |
| OXA-48-like_AOF02466.1_K.p.   | RANQAF | LPAST | FFKIP | NSLIA | LDLGV |
| OXA-48-like_ATQ26616.1_K.p.   | RANQAF | LPAST | FFKIP | NSLIA | LDLGV |
| OXA-48-like_AZB79861.1_K.p.   | RANQAF | LPAST | FFKIP | NSLIA | LDLGV |
| OXA-48-like_AZV17592.1_K.p.   | RANQAF | LPAST | FFKIP | NSLIA | LDLGV |
| OXA-48-like_QBG05392.1_K.p.   | RANQAF | LPAST | FFKIP | NSLIA | LDLGV |
| OXA-48-like_QBH46740.1_K.p.   | RANQAF | LPAST | FFKIP | NSLIA | LDLGV |
| OXA-48-like_QBH61269.1_K.p.   | RANQAF | LPAST | FFKIP | NSLIA | LDLGV |
| OXA-48-like_QLF61798.1_K.p.   | RANQAF | LPAST | FFKIP | NSLIA | LDLGV |
| OXA-48-like_QLF61822.1_K.p.   | RANQAF | LPAST | FFKIP | NSLIA | LDLGV |

acc



## OXA-198-like subfamily

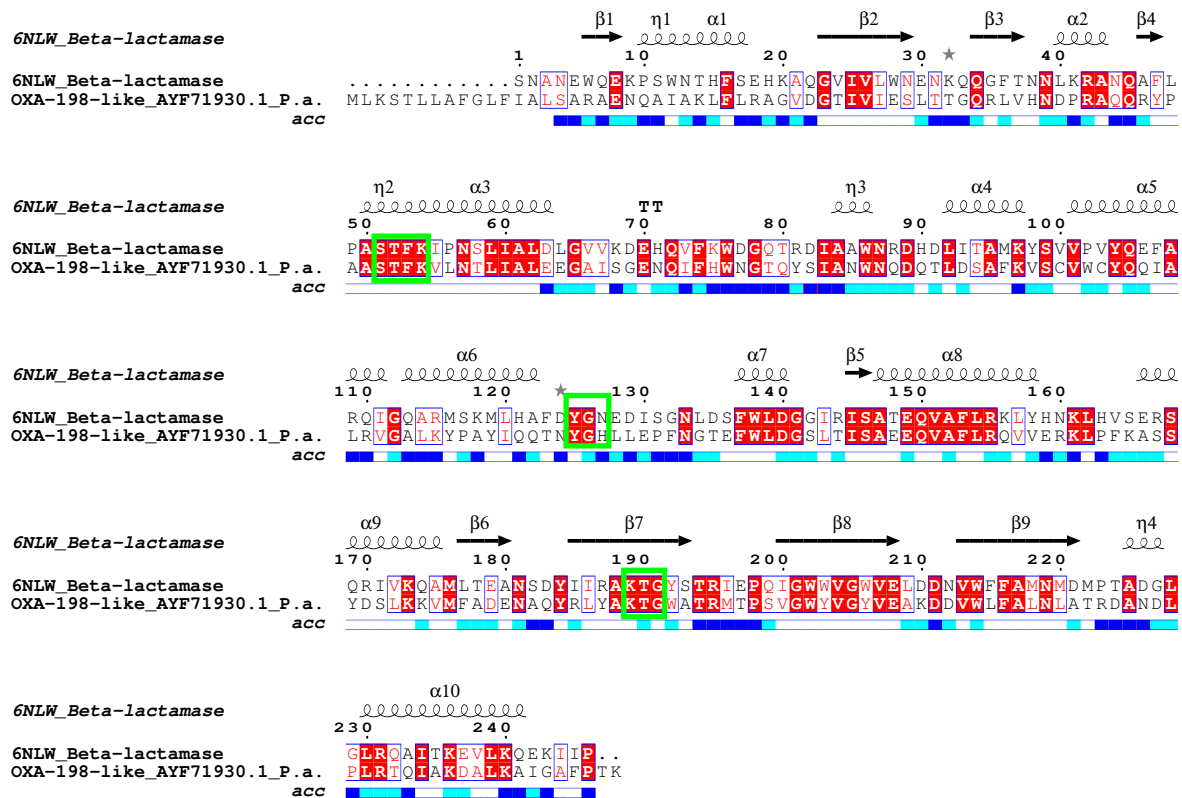

OXA-48-like subfamily

[illegible]

***acc***

OXA-48-like subfamily

*OXA-48-like\_QRC22072.1\_K.p.*

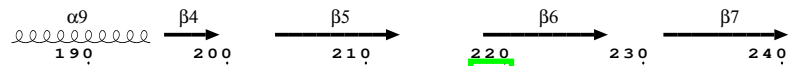

OXA-48-like\_QRC22072.1\_K.p.  
OXA-48-like\_ASG42064.1\_E.spp.  
OXA-48-like\_QRC13711.1\_K.p.  
OXA-48-like\_VAY01821.1\_K.p.  
OXA-48-like\_VAX91950.1\_K.p.  
OXA-48-like\_VAX91959.1\_K.p.  
OXA-48-like\_QPU62592.1\_K.p.  
OXA-48-like\_QOU38957.1\_K.p.  
OXA-48-like\_QOT97232.1\_K.p.  
OXA-48-like\_QLI133314.1\_K.p.  
OXA-48-like\_QLI27956.1\_K.p.  
OXA-48-like\_QLI22474.1\_K.p.  
OXA-48-like\_QLC16065.1\_K.p.  
OXA-48-like\_QLC05384.1\_K.p.  
OXA-48-like\_QLC00099.1\_K.p.  
OXA-48-like\_QLB94822.1\_K.p.  
OXA-48-like\_QLB89481.1\_K.p.  
OXA-48-like\_QLB84144.1\_K.p.  
OXA-48-like\_QLB78805.1\_K.p.  
OXA-48-like\_QLB73478.1\_K.p.  
OXA-48-like\_QIJ23388.1\_K.p.  
OXA-48-like\_QIJ17785.1\_K.p.  
OXA-48-like\_QND70559.1\_K.p.  
OXA-48-like\_QET12159.1\_K.p.  
OXA-48-like\_QCS89961.1\_K.p.  
OXA-48-like\_QCT00720.1\_K.p.  
OXA-48-like\_QDF35925.1\_K.p.  
OXA-48-like\_AZJ02288.1\_K.p.  
OXA-48-like\_AZJ07598.1\_K.p.  
OXA-48-like\_AXS22469.1\_K.p.  
OXA-48-like\_AXS22834.1\_K.p.  
OXA-48-like\_AXR54472.1\_K.p.  
OXA-48-like\_AWR57773.1\_K.p.  
OXA-48-like\_ART03415.1\_K.p.  
OXA-48-like\_ART03346.1\_K.p.  
OXA-48-like\_APQ28988.1\_K.p.  
OXA-48-like\_APP73786.1\_K.p.  
OXA-48-like\_APP67917.1\_K.p.  
OXA-48-like\_APP56266.1\_K.p.  
OXA-48-like\_APP50376.1\_K.p.  
OXA-48-like\_APP44504.1\_K.p.  
OXA-48-like\_APP38728.1\_K.p.  
OXA-48-like\_APM79240.1\_K.p.  
OXA-48-like\_APM73588.1\_K.p.  
OXA-48-like\_APM67987.1\_K.p.  
OXA-48-like\_APM62354.1\_K.p.  
OXA-48-like\_APM47124.1\_K.p.  
OXA-48-like\_APG80363.1\_K.p.  
OXA-48-like\_AOF13070.1\_K.p.  
OXA-48-like\_OPQ02212.1\_K.p.  
OXA-48-like\_OPQ02194.1\_K.p.  
OXA-48-like\_QIJ34285.1\_K.p.  
OXA-48-like\_QIJ09605.1\_K.p.  
OXA-48-like\_QIR58822.1\_K.p.  
5OE0\_1\_Beta-lactamase  
OXA-48-like\_ANE69785.1\_K.p.  
OXA-48-like\_ANE71804.1\_K.p.  
OXA-48-like\_ANE72730.1\_K.p.  
OXA-48-like\_AOA98603.1\_K.p.  
OXA-48-like\_CEP69754.1\_K.p.  
OXA-48-like\_CEP70896.1\_K.p.  
OXA-48-like\_CEP72746.1\_K.p.  
OXA-48-like\_CXT28768.1\_K.p.  
OXA-48-like\_ATX29640.1\_K.p.  
OXA-48-like\_AVO14768.1\_K.p.  
OXA-48-like\_AVO15618.1\_K.p.  
OXA-48-like\_AWD00385.1\_K.p.  
OXA-48-like\_AWD98100.1\_K.p.  
OXA-48-like\_AWS85277.1\_K.p.  
OXA-48-like\_QEG84876.1\_K.p.  
OXA-48-like\_QIR47572.1\_K.p.  
OXA-48-like\_QIR53202.1\_K.p.  
OXA-48-like\_QO50577.1\_K.p.  
OXA-48-like\_BBO98227.1\_K.p.  
OXA-48-like\_BBO99129.1\_K.p.  
OXA-48-like\_QDE47101.1\_E.spp.  
OXA-48-like\_ALG86783.1\_K.p.  
OXA-48-like\_ALH88756.1\_K.p.  
OXA-48-like\_AOF02466.1\_K.p.  
OXA-48-like\_AOT26616.1\_K.p.  
OXA-48-like\_AZB79861.1\_K.p.  
OXA-48-like\_AZV17592.1\_K.p.  
OXA-48-like\_QBG05392.1\_K.p.  
OXA-48-like\_QBH46740.1\_K.p.  
OXA-48-like\_QBH61269.1\_K.p.  
OXA-48-like\_OLF61798.1\_K.p.  
OXA-48-like\_OLF61822.1\_K.p.

[illegible]

acc



## OXA-48-like subfamily

|                               | η4                         | α10 |
|-------------------------------|----------------------------|-----|
| OXA-48-like_QRC22072.1_K.p.   | 222                        | 260 |
| OXA-48-like_QRC22072.1_K.p.   | MPTSDGGLGRLQAITKEVLKQEKIIP |     |
| OXA-48-like_ASG42064.1_E.spp. | MPTSDGGLGRLQAITKEVLKQEKIIP |     |
| OXA-48-like_QRC13711.1_K.p.   | MPTSDGGLGRLQAITKEVLKQEKIIP |     |
| OXA-48-like_VAY01821.1_K.p.   | MPTSDGGLGRLQAITKEVLKQEKIIP |     |
| OXA-48-like_VAX91950.1_K.p.   | MPTSDGGLGRLQAITKEVLKQEKIIP |     |
| OXA-48-like_VAX91959.1_K.p.   | MPTSDGGLGRLQAITKEVLKQEKIIP |     |
| OXA-48-like_QPP62592.1_K.p.   | MPTSDGGLGRLQAITKEVLKQEKIIP |     |
| OXA-48-like_QOU38957.1_K.p.   | MPTSDGGLGRLQAITKEVLKQEKIIP |     |
| OXA-48-like_QOT97232.1_K.p.   | MPTSDGGLGRLQAITKEVLKQEKIIP |     |
| OXA-48-like_QLI33314.1_K.p.   | MPTSDGGLGRLQAITKEVLKQEKIIP |     |
| OXA-48-like_QLI27956.1_K.p.   | MPTSDGGLGRLQAITKEVLKQEKIIP |     |
| OXA-48-like_QLI22474.1_K.p.   | MPTSDGGLGRLQAITKEVLKQEKIIP |     |
| OXA-48-like_QLC16065.1_K.p.   | MPTSDGGLGRLQAITKEVLKQEKIIP |     |
| OXA-48-like_QLC05384.1_K.p.   | MPTSDGGLGRLQAITKEVLKQEKIIP |     |
| OXA-48-like_QLC00099.1_K.p.   | MPTSDGGLGRLQAITKEVLKQEKIIP |     |
| OXA-48-like_QLB94822.1_K.p.   | MPTSDGGLGRLQAITKEVLKQEKIIP |     |
| OXA-48-like_QLB89481.1_K.p.   | MPTSDGGLGRLQAITKEVLKQEKIIP |     |
| OXA-48-like_QLB84144.1_K.p.   | MPTSDGGLGRLQAITKEVLKQEKIIP |     |
| OXA-48-like_QLB78805.1_K.p.   | MPTSDGGLGRLQAITKEVLKQEKIIP |     |
| OXA-48-like_QLB73478.1_K.p.   | MPTSDGGLGRLQAITKEVLKQEKIIP |     |
| OXA-48-like_QLI23388.1_K.p.   | MPTSDGGLGRLQAITKEVLKQEKIIP |     |
| OXA-48-like_QLI17785.1_K.p.   | MPTSDGGLGRLQAITKEVLKQEKIIP |     |
| OXA-48-like_QND07059.1_K.p.   | MPTSDGGLGRLQAITKEVLKQEKIIP |     |
| OXA-48-like_QET12150.1_K.p.   | MPTSDGGLGRLQAITKEVLKQEKIIP |     |
| OXA-48-like_QCS89961.1_K.p.   | MPTSDGGLGRLQAITKEVLKQEKIIP |     |
| OXA-48-like_QCT00720.1_K.p.   | MPTSDGGLGRLQAITKEVLKQEKIIP |     |
| OXA-48-like_QDF35925.1_K.p.   | MPTSDGGLGRLQAITKEVLKQEKIIP |     |
| OXA-48-like_AZJ02288.1_K.p.   | MPTSDGGLGRLQAITKEVLKQEKIIP |     |
| OXA-48-like_AZJ07598.1_K.p.   | MPTSDGGLGRLQAITKEVLKQEKIIP |     |
| OXA-48-like_AXZ224690.1_K.p.  | MPTSDGGLGRLQAITKEVLKQEKIIP |     |
| OXA-48-like_AXS22834.1_K.p.   | MPTSDGGLGRLQAITKEVLKQEKIIP |     |
| OXA-48-like_AXR54472.1_K.p.   | MPTSDGGLGRLQAITKEVLKQEKIIP |     |
| OXA-48-like_AWR57773.1_K.p.   | MPTSDGGLGRLQAITKEVLKQEKIIP |     |
| OXA-48-like_ART03415.1_K.p.   | MPTSDGGLGRLQAITKEVLKQEKIIP |     |
| OXA-48-like_ART03346.1_K.p.   | MPTSDGGLGRLQAITKEVLKQEKIIP |     |
| OXA-48-like_APQ28988.1_K.p.   | MPTSDGGLGRLQAITKEVLKQEKIIP |     |
| OXA-48-like_APP73786.1_K.p.   | MPTSDGGLGRLQAITKEVLKQEKIIP |     |
| OXA-48-like_APP67917.1_K.p.   | MPTSDGGLGRLQAITKEVLKQEKIIP |     |
| OXA-48-like_APP56266.1_K.p.   | MPTSDGGLGRLQAITKEVLKQEKIIP |     |
| OXA-48-like_APP50376.1_K.p.   | MPTSDGGLGRLQAITKEVLKQEKIIP |     |
| OXA-48-like_APP44504.1_K.p.   | MPTSDGGLGRLQAITKEVLKQEKIIP |     |
| OXA-48-like_APM38728.1_K.p.   | MPTSDGGLGRLQAITKEVLKQEKIIP |     |
| OXA-48-like_APM79240.1_K.p.   | MPTSDGGLGRLQAITKEVLKQEKIIP |     |
| OXA-48-like_APM73588.1_K.p.   | MPTSDGGLGRLQAITKEVLKQEKIIP |     |
| OXA-48-like_APM67987.1_K.p.   | MPTSDGGLGRLQAITKEVLKQEKIIP |     |
| OXA-48-like_APM62354.1_K.p.   | MPTSDGGLGRLQAITKEVLKQEKIIP |     |
| OXA-48-like_APM47124.1_K.p.   | MPTSDGGLGRLQAITKEVLKQEKIIP |     |
| OXA-48-like_APG80363.1_K.p.   | MPTSDGGLGRLQAITKEVLKQEKIIP |     |
| OXA-48-like_AOR13070.1_K.p.   | MPTSDGGLGRLQAITKEVLKQEKIIP |     |
| OXA-48-like_QPQ02212.1_K.p.   | MPTSDGGLGRLQAITKEVLKQEKIIP |     |
| OXA-48-like_QPQ02194.1_K.p.   | MPTSDGGLGRLQAITKEVLKQEKIIP |     |
| OXA-48-like_QLI34285.1_K.p.   | MPTSDGGLGRLQAITKEVLKQEKIIP |     |
| OXA-48-like_QLI09605.1_K.p.   | MPTSDGGLGRLQAITKEVLKQEKIIP |     |
| OXA-48-like_QIR58822.1_K.p.   | MPTSDGGLGRLQAITKEVLKQEKIIP |     |
| 50E0.1_Beta-lactamase         | MPTSDGGLGRLQAITKEVLKQEKIIP |     |
| OXA-48-like_ANE69785.1_K.p.   | MPTSDGGLGRLQAITKEVLKQEKIIP |     |
| OXA-48-like_ANE71804.1_K.p.   | MPTSDGGLGRLQAITKEVLKQEKIIP |     |
| OXA-48-like_ANE72730.1_K.p.   | MPTSDGGLGRLQAITKEVLKQEKIIP |     |
| OXA-48-like_AOA98603.1_K.p.   | MPTSDGGLGRLQAITKEVLKQEKIIP |     |
| OXA-48-like_CEP69754.1_K.p.   | MPTSDGGLGRLQAITKEVLKQEKIIP |     |
| OXA-48-like_CEP70686.1_K.p.   | MPTSDGGLGRLQAITKEVLKQEKIIP |     |
| OXA-48-like_CEP72746.1_K.p.   | MPTSDGGLGRLQAITKEVLKQEKIIP |     |
| OXA-48-like_ATX28768.1_K.p.   | MPTSDGGLGRLQAITKEVLKQEKIIP |     |
| OXA-48-like_ATX29640.1_K.p.   | MPTSDGGLGRLQAITKEVLKQEKIIP |     |
| OXA-48-like_AVO14768.1_K.p.   | MPTSDGGLGRLQAITKEVLKQEKIIP |     |
| OXA-48-like_AVO15618.1_K.p.   | MPTSDGGLGRLQAITKEVLKQEKIIP |     |
| OXA-48-like_AWD00385.1_K.p.   | MPTSDGGLGRLQAITKEVLKQEKIIP |     |
| OXA-48-like_AWD98100.1_K.p.   | MPTSDGGLGRLQAITKEVLKQEKIIP |     |
| OXA-48-like_AWS85277.1_K.p.   | MPTSDGGLGRLQAITKEVLKQEKIIP |     |
| OXA-48-like_QEG84876.1_K.p.   | MPTSDGGLGRLQAITKEVLKQEKIIP |     |
| OXA-48-like_QIR47572.1_K.p.   | MPTSDGGLGRLQAITKEVLKQEKIIP |     |
| OXA-48-like_QIR53202.1_K.p.   | MPTSDGGLGRLQAITKEVLKQEKIIP |     |
| OXA-48-like_QOQ50577.1_K.p.   | MPTSDGGLGRLQAITKEVLKQEKIIP |     |
| OXA-48-like_BBO98227.1_K.p.   | MPTSDGGLGRLQAITKEVLKQEKIIP |     |
| OXA-48-like_BBO99129.1_K.p.   | MPTSDGGLGRLQAITKEVLKQEKIIP |     |
| OXA-48-like_QDE47101.1_E.spp. | MPTSDGGLGRLQAITKEVLKQEKIIP |     |
| OXA-48-like_AIG86783.1_K.p.   | MPTSDGGLGRLQAITKEVLKQEKIIP |     |
| OXA-48-like_ALH88756.1_K.p.   | MPTSDGGLGRLQAITKEVLKQEKIIP |     |
| OXA-48-like_AOF02466.1_K.p.   | MPTSDGGLGRLQAITKEVLKQEKIIP |     |
| OXA-48-like_ATQ26616.1_K.p.   | MPTSDGGLGRLQAITKEVLKQEKIIP |     |
| OXA-48-like_AZB79861.1_K.p.   | MPTSDGGLGRLQAITKEVLKQEKIIP |     |
| OXA-48-like_AZV17592.1_K.p.   | MPTSDGGLGRLQAITKEVLKQEKIIP |     |
| OXA-48-like_QBG05392.1_K.p.   | MPTSDGGLGRLQAITKEVLKQEKIIP |     |
| OXA-48-like_QBH46740.1_K.p.   | MPTSDGGLGRLQAITKEVLKQEKIIP |     |
| OXA-48-like_QBH61269.1_K.p.   | MPTSDGGLGRLQAITKEVLKQEKIIP |     |
| OXA-48-like_QLF61798.1_K.p.   | MPTSDGGLGRLQAITKEVLKQEKIIP |     |
| OXA-48-like_QLF61822.1_K.p.   | MPTSDGGLGRLQAITKEVLKQEKIIP |     |

acc
